# Supplementary material for: Rh(i)-Catalyzed [3+2] annulation reactions of cyclopropenones with amides
Source: Royal Society of Chemistry journal article supplement (doi:10.1039/c9cc02397f), 2019-01-01
Supplement: c9cc02397f1.pdf [file c9cc02397f1.pdf]

## Supplementary Information

### Rh(I)-Catalyzed [3+2] Annulation Reactions of Cyclopropenones with Amides

Akira Haito and Naoto Chatani\*

*Department of Applied Chemistry, Faculty of Engineering, Osaka University,*

*Suita, Osaka 565-0871, Japan*

[chatani@chem.eng.osaka-u.ac.jp](mailto:chatani@chem.eng.osaka-u.ac.jp)

#### Contents

|                                                                                   |                |
|-----------------------------------------------------------------------------------|----------------|
| <b>I. General Information</b>                                                     | <b>S2</b>      |
| <b>II. Materials</b>                                                              | <b>S2</b>      |
| <b>III. General Procedure for Annulation of Amides with Cyclopropenones</b>       | <b>S2-S3</b>   |
| <b>IV. Optimization of Reaction Conditions Using Aliphatic Amides</b>             | <b>S3-S4</b>   |
| <b>V. Time Course for the Annulation of Aliphatic Amides with Cyclopropenones</b> | <b>S4</b>      |
| <b>VI. Re-Optimization of Reaction Conditions Using Aromatic Amides</b>           | <b>S5</b>      |
| <b>VII. Spectroscopic Data for [3+2] Annulation Products</b>                      | <b>S6-18</b>   |
| <b>VIII. X-ray structure and data of compound 3h-Z</b>                            | <b>S19-21</b>  |
| <b>IX. Copies of <sup>1</sup>H and <sup>13</sup>C NMR Spectra</b>                 | <b>S21-S89</b> |
| <b>X. References</b>                                                              | <b>S90</b>     |

## I. General Information.

<sup>1</sup>H NMR and <sup>13</sup>C NMR spectra were recorded on JEOL ECZS-400YH or JEOL ECS-400 spectrometers in CDCl<sub>3</sub> with tetramethylsilane as the internal standard. Data are reported as follows: chemical shift in ppm, multiplicity (s = singlet, d = doublet, t = triplet, q = quartet, bs = broad singlet, and m = multiplet), coupling constant (Hz), and integration. Infrared spectra (IR) were obtained using a JASCO FT/IR-4000; absorptions are reported in reciprocal centimeters with the following relative intensities: s (strong), m (medium), or w (weak). High resolution mass spectra (HRMS) were obtained on a JEOL JMS-T100LP instrument. Melting points were determined using a Stanford Research Systems apparatus. Column chromatography was performed with SiO<sub>2</sub> (Silicycle SiliaFlash F60 (230-400 mesh)). *E/Z* isomers were separated by Shimadzu Prominence HPLC System, equipped with a Phenomenex Luna Silica (2) (5 μm) column, and some compounds were purified by JAI LC-5060 (GPC) equipped with two JAIGEL-HR columns connected in series.

## II. Materials.

Toluene (Kanto Chemical) was purified by passage through activated alumina and under a positive pressure of N<sub>2</sub>. Diphenylcyclopropenone (Wako), 2-PhC<sub>6</sub>H<sub>4</sub>COOH (TCI) were purchased from the commercial suppliers, and used as received. [Rh(OAc)(cod)]<sub>2</sub>,<sup>1</sup> **1a**,<sup>2</sup> **1b**,<sup>3</sup> **1c**,<sup>4</sup> **1d**,<sup>2</sup> **1e**,<sup>2</sup> **1g**,<sup>5</sup> **1h**,<sup>6</sup> **1i**,<sup>7</sup> **1p**,<sup>8</sup> **1q**,<sup>7</sup> **1s**,<sup>9</sup> bis(4-methoxyphenyl)cyclopropenone,<sup>10</sup> bis(4-chlorophenyl)cyclopropenone,<sup>10</sup> diethylcyclopropenone,<sup>11</sup> bicyclo[5.1.0]oct-1(7)-en-8-one,<sup>12</sup> *N*-(quinolin-8-yl)pentanamide,<sup>13</sup> and 4-methyl-*N*-(quinolin-8-yl)benzamide<sup>14</sup> were prepared by the previously reported literature procedure. **1f**,<sup>5</sup> **1r**,<sup>7</sup> **1t**,<sup>9</sup> were prepared from respectively 3-methoxypropanoic acid (Wako), 4-nitrobenzoic acid (TCI) and 2-isopropylbenzoic acid (TCI) according to the literature procedure.

## III. General Procedure for the Annulation of Amides with Cyclopropenone

(i) For aliphatic amides.

[Rh(OAc)(cod)]<sub>2</sub> (8.1 mg, 0.015 mmol), *N*-(pyridin-2-ylmethyl)pentanamide (**1a**) (57.7 mg, 0.3 mmol), diphenylcyclopropenone (123.7 mg, 0.6 mmol), 2-phenylbenzoic acid (118.8 mg, 0.6 mmol) and toluene (2 mL) were placed in a 50-mL stainless steel autoclave. After charging the autoclave with 10 atm of carbon monoxide three times, it was pressurized to 1 atm. The autoclave was heated in an oil bath at 140 °C for 12 h and was then allowed to cool to room temperature. After filtering the mixture through a celite pad and washing with EtOAc, the filtrate was concentrated in vacuo. The residue was purified by column chromatography on silica gel (eluent: hexane/EtOAc= 1/1) and HPLC to afford (*Z*)-5-butyldiene-3,4-diphenyl-*N*-(pyridin-2-ylmethyl)-1,5-dihydro-2*H*-pyrrol-2-one (**3a-Z**) (46.2 mg, 41%) as a pale yellow oil and (*E*)-5-butyldiene-3,4-diphenyl-*N*-(pyridin-2-ylmethyl)-1,5-dihydro-2*H*-pyrrol-2-one (**3a-E**) (30.0 mg, 30%) as a pale yellow oil.

(ii) For aromatic amides.

[Rh(OAc)(cod)]<sub>2</sub> (16.2 mg, 0.03 mmol), *N*-(pyridin-2-ylmethyl)benzamide (**1i**) (63.7 mg, 0.3 mmol), Diphenylcyclopropenone (77.3 mg, 0.375 mmol) and toluene (2 mL) were placed in a 50-mL stainless steel autoclave. After charging the autoclave with 10 atm of carbon monoxide three times, it was pressurized to 1 atm. The autoclave was heated in an oil bath at 140 °C for 1 h and was then allowed to cool to room temperature. After filtering the mixture through a celite pad and washing with EtOAc, the filtrate was concentrated in vacuo. The residue was purified by column chromatography on silica gel (eluent: hexane/EtOAc= 1/1) to afford 5-hydroxy-3,4,5-triphenyl-*N*-(pyridin-2-ylmethyl)-1,5-dihydro-2*H*-pyrrol-2-one (**3i**) (90.4 mg, 72%) as a white solid.

#### IV. Optimization of Reaction Conditions Using Aliphatic Amides (Table S1)

| entry |                                                                                     | notes                                                                                                                                                                                                                                                                    | NMR yields (%) |           |    | entry |                                                                                      | notes | NMR yields (%) |           |    |
|-------|-------------------------------------------------------------------------------------|--------------------------------------------------------------------------------------------------------------------------------------------------------------------------------------------------------------------------------------------------------------------------|----------------|-----------|----|-------|--------------------------------------------------------------------------------------|-------|----------------|-----------|----|
|       |                                                                                     |                                                                                                                                                                                                                                                                          | <b>2a</b>      | <b>3a</b> | SM |       |                                                                                      |       | <b>2a</b>      | <b>3a</b> | SM |
|       |                                                                                     | 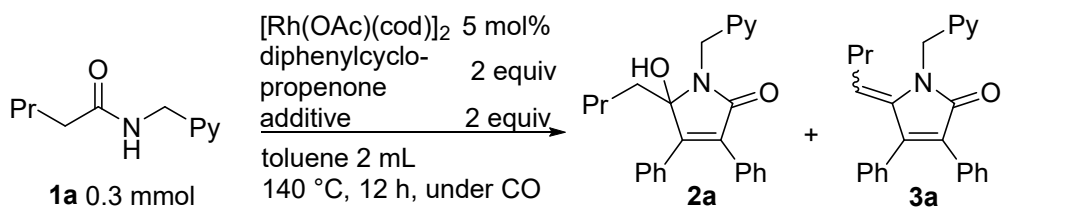<br><b>1a</b> 0.3 mmol<br>[Rh(OAc)(cod)] <sub>2</sub> 5 mol%<br>diphenylcyclopropenone 2 equiv<br>additive 2 equiv<br>toluene 2 mL<br>140 °C, 12 h, under CO<br><b>2a</b> + <b>3a</b> |                |           |    |       |                                                                                      |       |                |           |    |
| 1     | -                                                                                   |                                                                                                                                                                                                                                                                          | 56             | 18        | 0  | 8     |  | 5     | 72             | 0         |    |
| 2     | cat. Rh(CO)Cl(PPh <sub>3</sub> ) <sub>2</sub>                                       |                                                                                                                                                                                                                                                                          | 0              | 0         | 64 | 9     |  | 0     | 75             | 0         |    |
| 3     | Na <sub>2</sub> CO <sub>3</sub>                                                     |                                                                                                                                                                                                                                                                          | 85             | 14        | 0  | 10    | " under N <sub>2</sub>                                                               | 0     | 61             | 0         |    |
| 4     | PivOH                                                                               |                                                                                                                                                                                                                                                                          | 26             | 31        | 0  | 11    | " 130 °C                                                                             | 8     | 50             | 17        |    |
| 5     |  |                                                                                                                                                                                                                                                                          | 13             | 65        | 0  | 12    | " w/o Rh                                                                             | 0     | 0              | 83        |    |
| 6     |  |                                                                                                                                                                                                                                                                          | 10             | 70        | 0  | 13    |  | 0     | 82             | 0         |    |
| 7     |  |                                                                                                                                                                                                                                                                          | 0              | 62        | 0  |       |                                                                                      |       |                |           |    |

The reaction of diphenylcyclopropenone with *N*-(pyridin-2-ylmethyl)pentanamide (**1a**) in the presence of [Rh(OAc)(cod)]<sub>2</sub> in toluene at 140 °C under an atmosphere of CO gave a mixture of **2a** in 56% yield and **3a** in 18% yield (entry 1). Using Na<sub>2</sub>CO<sub>3</sub> (2 equiv) as an additive gave **2a** as the major product in 85% yield and **3a** in 14% yield (entry 3). In sharp contrast, **3a** was the major product when carboxylic acids were used as additives (entry 4-9). Using 2,6-dimethylbenzoic acid, **3a** was produced as the sole product in the reaction (entry 9). When the reaction was carried out in an atmosphere of N<sub>2</sub>,

a slightly lower product yield was obtained compared to the use of a CO atmosphere (entry 10), probably because of the decomposition of diphenylcyclopropenone to diphenylacetylene and CO. No reaction took place when the reaction was carried out in the absence of a rhodium catalyst (entry 12). After screening a series of carboxylic acids, 2-phenylbenzoic acid was found to be the additive of choice (entry 13).

#### V. Time Course for the Annulation of Aliphatic Amides with Cyclopropenone (Scheme S1)

An examination of the time course for the reaction indicated that **1a** had completely reacted after 1 h and that **2a** was rapidly formed (74% yield after 30 min). During the course of the reaction, the yield of **2a** gradually decreased, the yield of **3a** gradually increased and **2a** had completely disappeared after 12 h.

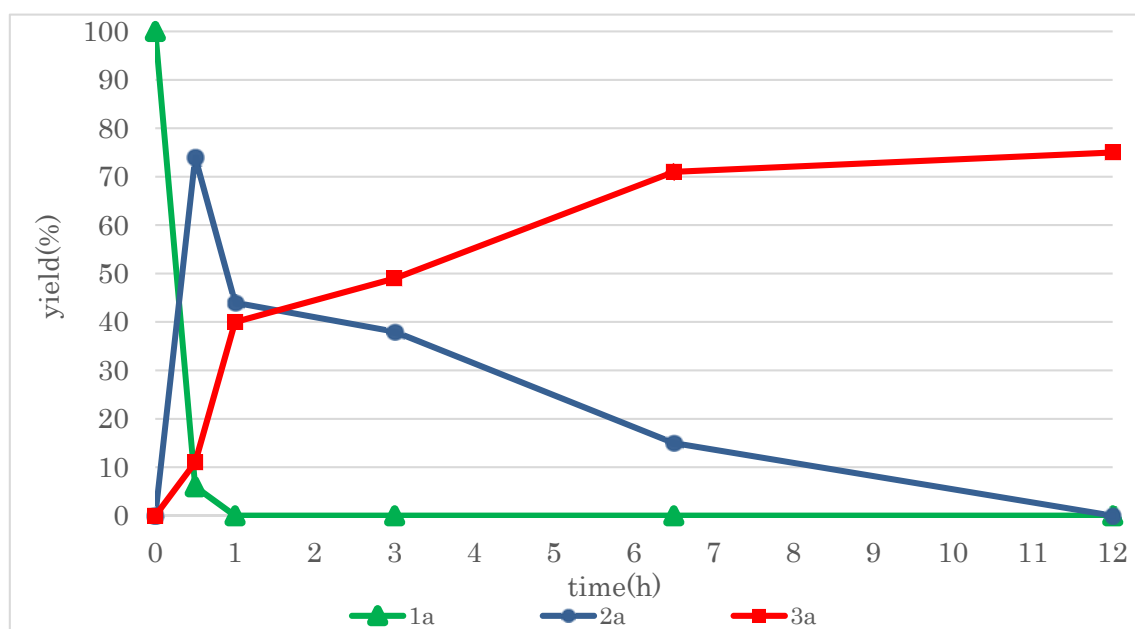

An examination of the time course for the reaction indicated that **1a** had completely reacted after 1 h and that **2a** was rapidly formed (74% yield after 30 min). During the course of the reaction, the yield of **2a** gradually decreased, the yield of **3a** gradually increased and **2a** had completely disappeared after 12 h.

## VI. Re-Optimization of Reaction Conditions Using Aromatic Amides (Table S2)

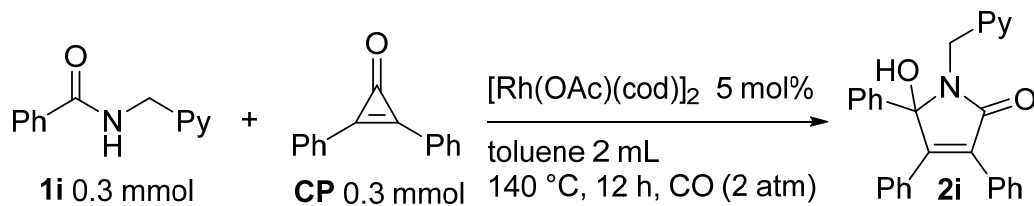

| entry           | note                                                                            | NMR yields (%) |           |     |
|-----------------|---------------------------------------------------------------------------------|----------------|-----------|-----|
|                 |                                                                                 | <b>2i</b>      | <b>SM</b> |     |
| 1 <sup>a</sup>  | 120 °C                                                                          | 50             | 33        |     |
| 2 <sup>a</sup>  | 140 °C                                                                          | 72             | 25        |     |
| 3 <sup>a</sup>  | 160 °C                                                                          | 73             | 18        |     |
| 4               | under CO                                                                        | 64             | 23        |     |
| 5               | CO (2 atm)                                                                      | 69             | 35        |     |
| 6               | CO (3 atm)                                                                      | 44             | 38        |     |
| 7               | Na <sub>2</sub> CO <sub>3</sub> (2 equiv)                                       | 43             | 59        |     |
| 8               | PivOH (1 equiv)                                                                 | 49             | 39        |     |
| 9               | CP (1.5 equiv), under CO                                                        | 79             | 0         | 20% |
| 10              | CP (1.5 equiv), under N <sub>2</sub> , 3 h                                      | 72             | 0         | 16% |
| 11              | CP (2 equiv), under CO, 1 h, Na <sub>2</sub> CO <sub>3</sub> (2 equiv)          | 62             | 0         | 29% |
| 12              | CP (1.3 equiv), under CO, 1 h, 2-PhC <sub>6</sub> H <sub>4</sub> COOH (1 equiv) | 70             | 12        | 11% |
| 13 <sup>a</sup> | CP (1.25 equiv), CO (1 atm), 1 h                                                | 80             | 0         | 9%  |

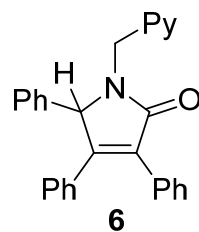

<sup>a</sup> [Rh(OAc)(cod)]<sub>2</sub> (10 mol%)

The reaction of *N*-(pyridin-2-ylmethyl) benzamide (**1i**) gave the expected product **2i**. When the reaction was carried out at 120 °C, and a CO pressure of 3 atm, the yield of product was quite low (entry 1-6). The addition of Na<sub>2</sub>CO<sub>3</sub> or PivOH had no effect on the reaction (entry 7 and 8). When the amount of cyclopropanone was increased (from 1 equiv to 1.5 equiv), **1i** disappeared and a higher yield of **2i** was obtained, but a reduction product **6** was generated in 21% yield (entry 9). In additional screening (entry 10-13), when the amount of cyclopropanone was reduced to 1.25 equivalents, **2i** was produced in 80% yield. Although no reaction conditions were identified in which the by-product **6** was not formed, **2i** was easily isolated in pure form by silica gel column chromatography.

## VII. Spectroscopic Data for [3+2] Annulation Products

### 5-butyl-5-hydroxy-3,4-diphenyl-*N*-(pyridin-2-ylmethyl)-1,5-dihydro-2*H*-pyrrol-2-one (2a)

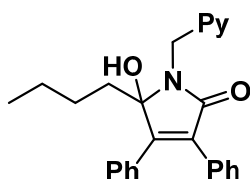

R<sub>f</sub> 0.23 (hexane/EtOAc = 1/1). Pale Yellow Oil. <sup>1</sup>H NMR (CDCl<sub>3</sub>, 399.78 MHz) δ 0.73 (t, *J* = 7.0 Hz, 3H), 0.94-1.08 (m, 2H), 1.14 (sep, *J* = 7.0 Hz, 2H), 1.91 (m, 2H), 4.51 (d, *J* = 16.0 Hz, 1H), 5.03 (d, *J* = 16.0 Hz, 1H), 7.17 (dd, *J* = 6.7, 4.8 Hz, 1H), 7.20-7.23 (m, 3H), 7.28-7.31 (m, 3H), 7.36-7.39 (m, 2H), 7.45 (d, *J* = 8.0 Hz, 1H), 7.60-7.63 (m, 2H), 7.66 (dt, *J* = 7.7, 1.9 Hz, 1H), 8.09 (brs, 1H), 8.42 (dq, *J* = 4.2, 1.0 Hz, 1H); <sup>13</sup>C NMR (CDCl<sub>3</sub>, 100.53 MHz) 13.89, 22.34, 25.05, 35.47, 44.36, 91.51, 122.67, 122.90, 127.97, 128.03, 128.36, 128.81, 129.20, 129.75, 130.57, 131.00, 132.91, 137.60, 148.30, 154.17, 156.90, 169.92; IR (CHCl<sub>3</sub>) 2957 w, 2930 w, 2864 w, 1686 m, 1597 w, 1435 w, 1397 w, 1321 w, 1153 w, 1075 w, 1007 w, 908 m, 846 w, 798 w, 728 s, 695 s; HRMS Calcd for C<sub>26</sub>H<sub>27</sub>N<sub>2</sub>O<sub>2</sub> (M+H)<sup>+</sup>: 399.2067; Found: 399.2058.

### 5-hydroxy-5-isopropyl-3,4-diphenyl-*N*-(pyridin-2-ylmethyl)-1,5-dihydro-2*H*-pyrrol-2-one (2g)

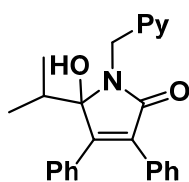

R<sub>f</sub> 0.29 (hexane/EtOAc = 1/1). Pale Yellow Solid. Mp = 182, 183 °C. <sup>1</sup>H NMR (CDCl<sub>3</sub>, 399.78 MHz) δ 0.75 (d, *J* = 6.8 Hz, 3H), 1.08 (d, *J* = 6.8 Hz, 3H), 2.17 (sep, *J* = 6.9 Hz, 1H), 4.64 (d, *J* = 15.8 Hz, 1H), 5.03 (d, *J* = 15.8 Hz, 1H), 7.16-7.21 (m, 4H), 7.25-7.31 (m, 5H), 7.43 (d, *J* = 7.8 Hz, 1H), 7.60-7.63 (m, 2H), 7.67 (td, *J* = 7.6, 1.4 Hz, 1H), 8.17 (brs, 1H), 8.44 (dq, *J* = 5.0, 0.9 Hz, 1H); <sup>13</sup>C NMR (CDCl<sub>3</sub>, 100.53 MHz) δ 16.72, 17.00, 35.00, 45.74, 93.40, 122.68, 123.07, 127.88, 128.02, 128.35, 128.76, 129.53, 129.79, 130.96, 131.30, 134.01, 137.64, 148.38, 155.18, 157.20, 170.77; IR (CHCl<sub>3</sub>) 3057 w, 2966 w, 1688 s, 1598 w, 1573 w, 1437 w, 1392 m, 1301 w, 1152 w, 1065 w, 1006 w, 910 m, 789 w, 757 w, 728 s, 695 s; HRMS Calcd for C<sub>25</sub>H<sub>25</sub>N<sub>2</sub>O<sub>2</sub> (M+H)<sup>+</sup>: 385.1911; Found: 385.1892.

### 5-hydroxy-3,4,5-triphenyl-*N*-(pyridin-2-ylmethyl)-1,5-dihydro-2*H*-pyrrol-2-one (2i)

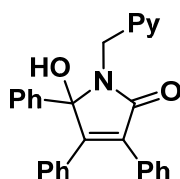

R<sub>f</sub> 0.31 (hexane/EtOAc = 1/1). White Solid. Mp = 156, 157 °C. <sup>1</sup>H NMR (CDCl<sub>3</sub>, 399.78 MHz) δ 4.03, (d, *J* = 16.3 Hz, 1H), 5.02 (d, *J* = 16.3 Hz, 1H), 7.10-7.31 (m, 10H), 7.35 (q, *J* = 6.7 Hz, 3H), 7.44-7.47 (m, 2H), 7.59 (dd, *J* = 7.0, 1.6 Hz, 2H), 7.68 (td, *J* = 7.7, 1.9 Hz, 1H), 8.49 (dq, *J* = 4.8, 1.0 Hz, 1H), 9.30 (brs, 1H); <sup>13</sup>C NMR (CDCl<sub>3</sub>, 100.53 MHz) δ 45.09, 91.64, 122.77, 122.82, 126.76, 128.19, 128.23, 128.47, 128.74, 129.32, 129.35, 129.72, 129.91, 129.92, 131.21, 132.51, 138.00, 139.52, 148.24, 156.33, 156.94, 170.04; IR (CHCl<sub>3</sub>) 3058 w, 3030 w, 1693 s, 1598 w, 1573 w, 1488 w, 1442 w, 1390 m, 1309 w, 1201 w, 1149 w, 1050 w, 1008 w, 944 w, 910 m, 792 w, 730 s, 695 s; HRMS Calcd for C<sub>28</sub>H<sub>23</sub>N<sub>2</sub>O<sub>2</sub> (M+H)<sup>+</sup>: 419.1754; Found: 419.1744.

**5-(4-(dimethylamino)phenyl)-5-hydroxy-3,4-diphenyl-N-(pyridin-2-ylmethyl)-1,5-dihydro-2H-pyrrol-2-one (2j)**

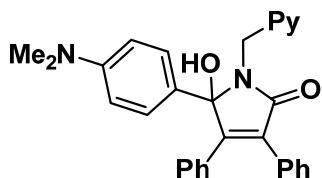

R<sub>f</sub> 0.20 (hexane/EtOAc = 1/1). Yellow Solid. Mp = 202-203 °C. <sup>1</sup>H NMR (CDCl<sub>3</sub>, 399.78 MHz) δ 2.95 (s, 6H), 4.06 (d, *J* = 16.2 Hz, 1H), 5.01 (d, *J* = 16.2 Hz, 1H), 6.69 (d, *J* = 8.9 Hz, 2H), 7.12-7.29 (m, 9H), 7.27 (d, *J* = 7.8 Hz, 1H), 7.41-7.46 (m, 4H), 7.68 (td, *J* = 7.8, 1.8 Hz, 1H), 9.12 (brs, 1H); <sup>13</sup>C NMR (CDCl<sub>3</sub>, 100.53 MHz) δ 40.51, 44.97, 91.84, 112.31, 122.66, 126.18, 127.66, 128.01, 128.12, 128.15, 128.56, 129.33, 129.42, 129.93, 131.46, 132.80, 137.87, 148.23, 150.39, 156.51, 157.21, 169.67; IR (CHCl<sub>3</sub>) 3057 w, 2881 w, 2850 w, 2806 w, 2245 w, 1691 s, 1610 m, 1521 m, 1441 w, 1391 w, 1356 w, 1225 w, 1164 w, 1065 w, 944 w, 910 m, 823 w, 794 w, 756 w, 730 s, 695 s; HRMS Calcd for C<sub>30</sub>H<sub>28</sub>N<sub>3</sub>O<sub>2</sub> (M+H)<sup>+</sup>: 462.2176; Found: 462.2157.

**5-hydroxy-5-(4-methoxyphenyl)-3,4-diphenyl-N-(pyridin-2-ylmethyl)-1,5-dihydro-2H-pyrrol-2-one (2k)**

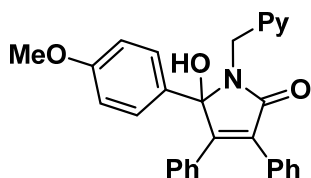

R<sub>f</sub> 0.29 (hexane/EtOAc = 1/1). White Amorphous. <sup>1</sup>H NMR (CDCl<sub>3</sub>, 399.78 MHz) δ 3.79 (s, 3H), 4.05 (d, *J* = 16.2 Hz, 1H), 5.01 (d, *J* = 16.5 Hz, 1H), 6.87 (d, *J* = 9.2 Hz, 2H), 7.12-7.27 (m, 9H), 7.39 (d, *J* = 7.8 Hz, 1H), 7.43-7.46 (m, 2H), 7.49 (d, *J* = 8.9 Hz, 2H), 7.70 (td, *J* = 7.8, 1.6 Hz, 1H), 8.49 (dd, *J* = 5.0, 0.9 Hz, 1H), 9.22 (brs, 1H); <sup>13</sup>C NMR (CDCl<sub>3</sub>, 100.53 MHz) δ 44.95, 55.34, 91.54, 114.03, 122.76, 122.78, 128.07, 128.14, 128.16, 128.17, 128.19, 128.67, 129.34, 129.48, 129.89, 131.23, 132.60, 138.02, 148.16, 156.35, 156.96, 159.64, 169.95; IR (CHCl<sub>3</sub>) 3058 w, 2928 w, 2837

w, 2247 w, 1693 s, 1599 w, 1509 m, 1440 w, 1390 m, 1306 w, 1250 m, 1170 m, 1030 w, 947 w, 911 m, 835 w, 796 w, 730 s, 695 s; HRMS Calcd for C<sub>29</sub>H<sub>25</sub>N<sub>2</sub>O<sub>3</sub> (M+H)<sup>+</sup>: 449.1860; Found: 449.1887.

**5-hydroxy-3,4-diphenyl-N-(pyridin-2-ylmethyl)-5-(*p*-tolyl)-1,5-dihydro-2H-pyrrol-2-one (2l)**

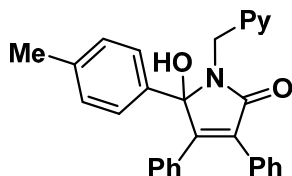

R<sub>f</sub> 0.37 (hexane/EtOAc = 1/1). Pale Yellow Oil. <sup>1</sup>H NMR (CDCl<sub>3</sub>, 399.78 MHz) δ 2.32 (s, 3H), 4.03 (d, *J* = 16.5 Hz, 1H), 5.01 (d, *J* = 16.5 Hz, 1H), 7.11-7.29 (m, 11H), 7.38 (d, *J* = 8.0 Hz, 1H), 7.44-7.48 (m, 4H), 7.69 (td, *J* = 7.8, 1.8 Hz, 1H), 9.23 (brs, 1H); <sup>13</sup>C NMR (CDCl<sub>3</sub>, 100.53 MHz) δ 21.28, 45.00, 91.66, 122.75, 122.78, 126.66, 128.16, 128.21, 128.69, 128.68, 129.37, 129.47, 129.64, 129.92, 131.27, 132.57, 136.41, 138.00, 138.19, 148.19, 156.30, 156.97, 169.99; IR (CHCl<sub>3</sub>) 3056 w, 3021 w, 2920 w, 2247 w, 1692 s, 1598 w, 1574 w, 1423 w, 1390 m, 1309 w, 1150 w, 1050 w, 1008 w, 953 w, 909 m, 826 w, 783 w, 728 s, 694 s; HRMS Calcd for C<sub>29</sub>H<sub>25</sub>N<sub>2</sub>O<sub>2</sub> (M+H)<sup>+</sup>: 433.1911; Found: 433.1899.

**5-(4-chlorophenyl)-5-hydroxy-3,4-diphenyl-N-(pyridin-2-ylmethyl)-1,5-dihydro-2H-pyrrol-2-one (2m)**

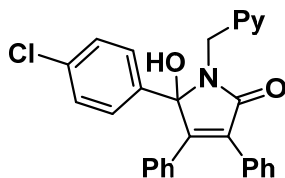

R<sub>f</sub> 0.37 (hexane/EtOAc = 1/1). White Amorphous. <sup>1</sup>H NMR (CDCl<sub>3</sub>, 399.78 MHz) δ 4.03 (d, *J* = 16.3 Hz, 1H), 5.01 (d, *J* = 16.2 Hz, 1H), 7.12-7.28 (m, 9H), 7.30 (d, *J* = 8.9 Hz, 2H), 7.39 (d, *J* = 7.8 Hz, 1H), 7.43-7.48 (m, 2H), 7.53 (d, *J* = 8.4 Hz, 2H), 7.70 (td, *J* = 7.8, 1.6 Hz, 1H), 8.48 (d, *J* = 4.4 Hz, 1H), 9.40 (brs, 1H); <sup>13</sup>C NMR (CDCl<sub>3</sub>, 100.53 MHz) δ 44.97, 91.22, 122.79, 122.90, 128.23, 128.25, 128.30, 128.85, 128.89, 129.23, 129.73, 129.84, 129.90, 130.93, 132.27, 134.31, 138.08, 138.30, 148.14, 155.92, 156.62, 169.89, 169.89; IR (CHCl<sub>3</sub>) 3059 w, 2249 w, 1694 s, 1599 w, 1487 w, 1391 m, 1310 w, 1151 w, 1093 w, 1011 w, 907 s, 834 w, 793 w, 726 s, 694 s; HRMS Calcd for C<sub>28</sub>H<sub>2</sub>ClN<sub>2</sub>O<sub>2</sub> (M+H)<sup>+</sup>: 453.1364; Found: 453.1368.



**5-(4-bromophenyl)-5-hydroxy-3,4-diphenyl-N-(pyridin-2-ylmethyl)-1,5-dihydro-2H-pyrrol-2-one (2n)**

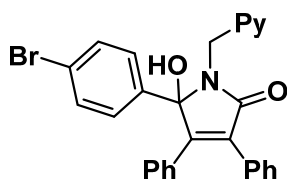

R<sub>f</sub> 0.40 (hexane/EtOAc = 1/1). Pale Yellow Amorphous. <sup>1</sup>H NMR (CDCl<sub>3</sub>, 399.78 MHz) δ 4.03 (d, *J* = 16.3 Hz, 1H), 5.00 (d, *J* = 16.3 Hz, 1H), 7.12-7.26 (m, 9H), 7.39 (d, *J* = 7.7 Hz, 1H), 7.42-7.46 (m, 6H), 7.70 (td, *J* = 8.0, 1.9 Hz, 1H), 8.48 (d, *J* = 4.5 Hz, 1H), 9.41 (brs, 1H); <sup>13</sup>C NMR (CDCl<sub>3</sub>, 100.53 MHz) δ 45.00, 91.27, 122.61, 122.80, 122.91, 128.25, 128.28, 128.32, 128.59, 128.88, 129.24, 129.77, 129.86, 130.93, 131.86, 132.26, 138.07, 138.90, 148.18, 155.87, 156.64, 169.91; IR (CHCl<sub>3</sub>) 3057 w, 3024 w, 1694 s, 1598 w, 1574 w, 1484 w, 1423 w, 1391 m, 1310 w, 1200 w, 1150 w, 1198 w, 1071 w, 1010 w, 952 w, 909 m, 832 w, 793 w, 729 s, 695 s; HRMS Calcd for C<sub>28</sub>H<sub>22</sub>BrN<sub>2</sub>O<sub>2</sub> (M+H)<sup>+</sup>: 497.0859; Found: 497.0842.

**5-(4-acetylphenyl)-5-hydroxy-3,4-diphenyl-N-(pyridin-2-ylmethyl)-1,5-dihydro-2H-pyrrol-2-one (2o)**

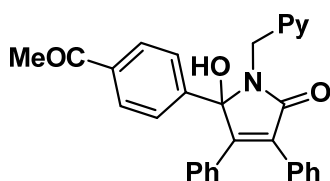

R<sub>f</sub> 0.23 (hexane/EtOAc = 1/1). Pale Yellow Solid. Mp = 191-192 °C. <sup>1</sup>H NMR (CDCl<sub>3</sub>, 395.88 MHz) δ 2.56 (s, 3H), 4.02 (d, *J* = 16.2 Hz, 1H), 5.02 (d, *J* = 16.2 Hz, 1H), 7.11-7.18 (m, 3H), 7.23-7.27 (m, 6H), 7.39 (d, *J* = 7.5 Hz, 1H), 7.45-7.47 (m, 2H), 7.68-7.71 (m, 3H), 7.92 (d, *J* = 8.7 Hz, 2H), 8.49 (d, *J* = 4.4 Hz, 1H), 9.47 (brs, 1H); <sup>13</sup>C NMR (CDCl<sub>3</sub>, 99.55 MHz) δ 26.76, 45.05, 91.31, 122.77, 122.92, 127.02, 128.23, 128.24, 128.35, 128.73, 128.86, 129.19, 129.82, 129.94, 130.87, 132.18, 137.07, 138.06, 145.07, 148.16, 155.78, 156.53, 169.91, 197.74; IR (CHCl<sub>3</sub>) 3058 w, 2835 w, 2249 w, 1684 s, 1602 w, 1424 w, 1389 m, 1309 w, 1267 m, 1150 w, 1074 w, 1010 w, 953 w, 909 m, 837 w, 794 w, 727 s, 694 s; HRMS Calcd for C<sub>30</sub>H<sub>25</sub>N<sub>2</sub>O<sub>2</sub> (M+H)<sup>+</sup>: 461.1860; Found: 461.1827.

**5-hydroxy-3,4-diphenyl-N-(pyridin-2-ylmethyl)-5-(4-(trifluoromethyl)phenyl)-1,5-dihydro-2H-pyrrol-2-one (2p)**

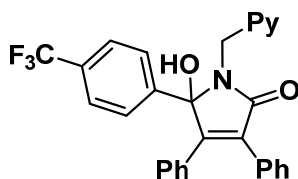

R<sub>f</sub> 0.40 (hexane/EtOAc = 1/1). Pale Yellow Amorphous. <sup>1</sup>H NMR (CDCl<sub>3</sub>, 395.88 MHz) δ 4.01 (d, *J* = 16.3 Hz, 1H), 5.02 (d, *J* = 16.3 Hz, 1H), 7.12-7.19 (m, 3H), 7.21-7.7.28 (m, 6H), 7.38 (d, *J* = 7.7 Hz, 1H), 7.44-7.47 (m, 2H), 7.59 (d, *J* = 8.1 Hz, 2H), 7.68 (d, *J* = 7.7, 1.8 Hz, 1H), 7.73 (d, *J* = 7.7 Hz, 2H), 8.49 (dq, *J* = 4.1, 0.9 Hz, 1H), 9.51 (brs, 1H); <sup>13</sup>C NMR (CDCl<sub>3</sub>, 99.55 MHz) δ 45.06, 91.20, 122.83, 122.96, 125.45, 125.68 (q, *J* = 2.0 Hz), 127.21, 128.29 (d, *J* = 152 Hz), 128.40, 128.94, 129.21, 129.85, 130.01, 130.38, 130.70, 130.85, 132.14, 138.10, 144.03, 148.18, 155.79, 156.51, 169.93; IR (CHCl<sub>3</sub>) 3060 w, 2923 w, 1696 m, 1599 w, 1574 w, 1485 w, 1389 w, 1323 s, 1165 w, 1124 m, 1067 m, 1016 w, 941 w, 908 m, 866 w, 842 w, 794 w, 729 s, 694 s; HRMS Calcd for C<sub>29</sub>H<sub>22</sub>F<sub>3</sub>N<sub>2</sub>O<sub>2</sub> (M+H)<sup>+</sup>: 487.1628; Found: 487.1642.

**4-(2-hydroxy-5-oxo-3,4-diphenyl-*N*-(pyridin-2-ylmethyl)-1,5-dihydro-2*H*-pyrrol-2-yl)benzonitrile (2q)**

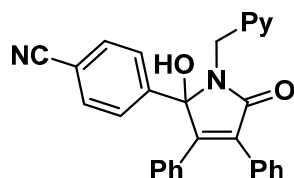

R<sub>f</sub> 0.26 (hexane/EtOAc = 1/1). Pale Yellow Amorphous. <sup>1</sup>H NMR (CDCl<sub>3</sub>, 399.78 MHz) δ 4.01 (d, *J* = 16.4 Hz, 1H), 5.01 (d, *J* = 16.5 Hz, 1H), 7.12-7.26 (m, 9H), 7.39 (d, *J* = 7.8 Hz, 1H), 7.44-7.46 (m, 2H), 7.61 (d, *J* = 8.5 Hz, 2H), 7.68-7.72 (m, 3H), 8.48 (d, *J* = 4.6 Hz, 1H), 9.59 (brs, 1H); <sup>13</sup>C NMR (CDCl<sub>3</sub>, 100.53 MHz) δ 44.99, 112.21, 118.59, 122.80, 122.98, 127.51, 128.22, 128.29, 128.43, 128.97, 129.05, 129.74, 129.97, 130.57, 131.93, 132.45, 138.11, 145.33, 148.09, 155.47, 156.23, 169.84; IR (CHCl<sub>3</sub>) 3059 w, 2763 w, 2229 w, 1696 m, 1600 w, 1487 w, 1423 w, 1388 w, 1310 w, 1202 w, 1150 w, 1051 w, 1010 w, 941 w, 909 m, 840 w, 794 w, 727 s, 694 s; HRMS Calcd for C<sub>29</sub>H<sub>22</sub>N<sub>3</sub>O<sub>2</sub> (M+H)<sup>+</sup>: 444.1707; Found: 444.1700.

**5-hydroxy-5-(4-nitrophenyl)-3,4-diphenyl-*N*-(pyridin-2-ylmethyl)-1,5-dihydro-2*H*-pyrrol-2-one (2r)**

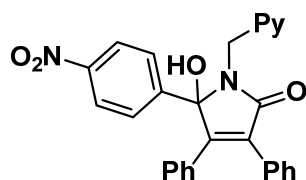

R<sub>f</sub> 0.34 (hexane/EtOAc = 1/1). Pale Yellow Amorphous. <sup>1</sup>H NMR (CDCl<sub>3</sub>, 399.78 MHz) δ 4.04 (d, *J* = 16.2 Hz, 1H), 5.03 (d, *J* = 16.5 Hz, 1H), 7.13-7.23 (m, 3H), 7.26-7.29 (m, 6H), 7.42 (d, *J* = 8.0 Hz, 1H), 7.44-7.48 (m, 2H), 7.74 (td, *J* = 7.8, 1.6 Hz, 1H), 7.77 (d, *J* = 8.7 Hz, 2H), 8.17 (dd, *J* = 9.2, 1.2 Hz, 2H), 8.51 (dq, *J* = 5.0, 0.7 Hz, 1H), 9.67 (brs, 1H); <sup>13</sup>C NMR (CDCl<sub>3</sub>, 100.53 MHz) δ 45.10, 91.06, 122.94, 123.13, 123.91, 127.88, 128.32, 128.43, 128.56, 129.12, 129.14, 129.83, 130.10, 130.59,

131.96, 138.27, 147.43, 147.98, 148.17, 155.50, 156.25, 169.95; IR (CHCl<sub>3</sub>) 3061 w, 1697 s, 1599 w, 1520 m, 1487 w, 1424 w, 1388 w, 1347 s, 1312 w, 1199 w, 1151 w, 1100 w, 1051 w, 1011 w, 942 w, 909 m, 871 w, 853 w, 793 w, 728 s, 695 s; HRMS Calcd for C<sub>28</sub>H<sub>22</sub>N<sub>3</sub>O<sub>4</sub> (M+H)<sup>+</sup>: 464.1605; Found: 464.1598.

**5-hydroxy-3,4-diphenyl-N-(pyridin-2-ylmethyl)-5-(*o*-tolyl)-1,5-dihydro-2H-pyrrol-2-one (2s)**

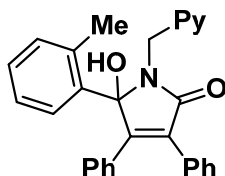

R<sub>f</sub> 0.50 (hexane/EtOAc = 1/1). Pale Yellow Amorphous. <sup>1</sup>H NMR (CDCl<sub>3</sub>, 395.88 MHz) δ 2.27 (s, 3H), 3.99 (d, *J* = 16.3 Hz, 1H), 4.98 (d, *J* = 16.3 Hz, 1H), 7.08-7.27 (m, 12H), 7.35 (d, *J* = 7.8 Hz, 1H), 7.42-7.45 (m, 2H), 7.66 (td, *J* = 7.8, 1.4 Hz, 1H), 8.18 (dd, *J* = 7.8, 2.3 Hz, 1H), 8.48 (d, *J* = 4.6 Hz, 1H), 9.41 (brs, 1H); <sup>13</sup>C NMR (CDCl<sub>3</sub>, 99.54 MHz) δ 20.00, 45.11, 91.12, 122.59, 122.75, 126.37, 128.16, 128.19, 128.24, 128.74, 128.85, 129.01, 129.70, 130.24, 130.48, 131.24, 132.20, 132.47, 135.16, 136.65, 137.92, 148.17, 154.95, 156.71, 170.41; IR (CHCl<sub>3</sub>) 3060 w, 2247 w, 1692 s, 1598 w, 1574 w, 1482 w, 1439 w, 1389 w, 1311 w, 1203 w, 1130 w, 1041 w, 1008 w, 909 m, 728 s, 694 w; HRMS Calcd for C<sub>29</sub>H<sub>25</sub>N<sub>2</sub>O<sub>2</sub> (M+H)<sup>+</sup>: 433.1911; Found: 433.1889.

**5-hydroxy-5-(2-isopropylphenyl)-3,4-diphenyl-N-(pyridin-2-ylmethyl)-1,5-dihydro-2H-pyrrol-2-one (2t)**

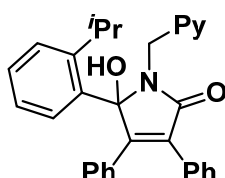

R<sub>f</sub> 0.51 (hexane/EtOAc = 1/1). White Amorphous. <sup>1</sup>H NMR (CDCl<sub>3</sub>, 399.78 MHz) δ 1.06 (d, *J* = 6.6 Hz, 3H), 1.19 (t, *J* = 6.9 Hz, 3H), 3.34 (sept, *J* = 6.8 Hz, 1H), 4.08 (d, *J* = 16.3 Hz, 1H), 4.98 (d, *J* = 16.5, 1H), 7.06-7.43 (m, 15H), 7.68 (td, *J* = 7.9, 1.8 Hz, 1H), 8.26 (dd, *J* = 7.8, 0.7 Hz, 1H), 8.48 (dt, *J* = 4.1, 0.9 Hz, 1H), 9.53 (brs, 1H); <sup>13</sup>C NMR (CDCl<sub>3</sub>, 100.53 MHz) δ 24.46, 24.86, 27.88, 45.58, 90.91, 122.62, 122.78, 125.90, 127.13, 128.12, 128.18, 128.37, 128.90, 129.31, 129.45, 129.67, 129.76, 130.10, 131.53, 132.27, 134.64, 137.97, 147.24, 148.13, 156.73, 157.23, 170.41; IR (CHCl<sub>3</sub>) 3061 w, 2960 w, 2868 w, 2247 w, 1693 s, 1598 w, 1481 w, 1442 w, 1388 m, 1310 w, 1153 w, 1126 w, 1030 w, 957 w, 760 s; HRMS Calcd for C<sub>31</sub>H<sub>29</sub>N<sub>2</sub>O<sub>2</sub> (M+H)<sup>+</sup>: 461.2224; Found: 461.2228.

**5-(4-acetylphenyl)-5-hydroxy-3,4-bis(4-methoxyphenyl)-N-(pyridin-2-ylmethyl)-1,5-dihydro-2H-pyrrol-2-one (2u)**

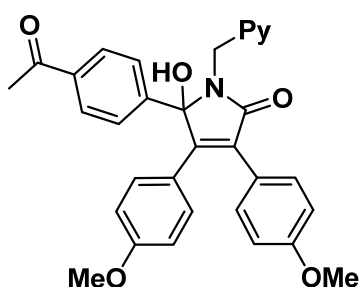

R<sub>f</sub> 0.26 (hexane/EtOAc = 1/2). Pale Yellow Oil. <sup>1</sup>H NMR (CDCl<sub>3</sub>, 399.78 MHz) δ 2.57 (s, 3H), 3.71 (s, 3H), 3.78 (s, 3H), 3.98 (d, *J* = 16.2 Hz, 1H), 4.99 (d, *J* = 16.5 Hz, 1H), 6.67 (dt, *J* = 9.2, 2.8 Hz, 2H), 6.83 (dt, *J* = 8.9, 2.1 Hz, 2H), 7.22-7.26 (m, 3H), 7.39 (d, *J* = 16.2 Hz, 1H), 7.44 (dt, *J* = 8.9, 2.0 Hz, 2H), 7.68-7.72 (m, 3H), 7.92 (d, *J* = 8.7 Hz, 2H), 8.49 (dq, *J* = 4.8, 0.7 Hz, 1H), 9.43 (brs, 1H); <sup>13</sup>C NMR (CDCl<sub>3</sub>, 100.53 MHz) δ 26.78, 44.93, 55.15, 55.27, 91.17, 113.72, 113.79, 122.76, 122.87, 213.55, 124.59, 216.97, 128.25, 128.73, 130.72, 131.17, 136.98, 138.03, 145.68, 148.16, 153.96, 156.66, 159.54, 159.83, 170.32, 197.81; IR (CHCl<sub>3</sub>) 3072 w, 2931 w, 2838 w, 2249 w, 1685 s, 1604 m, 1572 w, 1507 m, 1423 w, 1389 w, 1295 m, 1250 s, 1178 m, 1150 w, 1029 w, 954 w, 829 w, 732 m; HRMS Calcd for C<sub>32</sub>H<sub>29</sub>N<sub>2</sub>O<sub>5</sub> (M+H)<sup>+</sup>: 521.2071; Found: 521.2089.

**5-(4-acetylphenyl)-3,4-bis(4-chlorophenyl)-5-hydroxy-N-(pyridin-2-ylmethyl)-1,5-dihydro-2H-pyrrol-2-one (2v)**

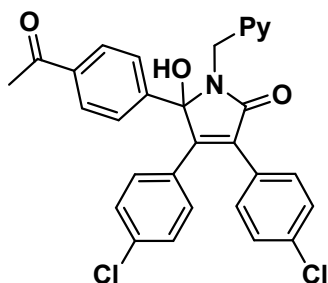

R<sub>f</sub> 0.36 (hexane/EtOAc = 1/2). Pale Yellow Amorphous. <sup>1</sup>H NMR (CDCl<sub>3</sub>, 399.78 MHz) δ 2.58 (s, 3H), 4.02 (d, *J* = 16.2 Hz, 1H), 5.00 (d, *J* = 16.5 Hz, 1H), 7.14 (dt, *J* = 8.9, 2.1 Hz, 2H), 7.20 (dt, *J* = 8.9, 2.3 Hz, 2H), 7.25-7.29 (m, 3H), 7.38-7.41 (m, 3H), 7.65 (d, *J* = 8.2 Hz, 2H), 7.74 (td, *J* = 7.8, 1.6 Hz, 1H), 7.93 (dd, *J* = 8.7, 1.2 Hz, 2H), 8.51 (dq, *J* = 5.0, 0.9 Hz, 2H), 9.61 (brs, 1H); <sup>13</sup>C NMR (CDCl<sub>3</sub>, 100.53 MHz) δ 26.83, 45.11, 91.29, 122.87, 123.13, 126.97, 128.73, 128.83, 128.90, 129.00, 129.16, 130.42, 130.50, 131.19, 134.69, 135.20, 137.30, 138.30, 144.52, 148.16, 154.98, 156.28, 169.42, 197.70; IR (CHCl<sub>3</sub>) 3063 w, 2922 w, 2251 w, 1685 m, 1601 w, 1486 w, 1424 w, 1390 w, 1358 w, 1309 w, 1267 w, 1202 w, 1150 w, 1092 w, 1013 w, 954 w, 908 m, 821 w, 727 s; HRMS Calcd for C<sub>30</sub>H<sub>23</sub>Cl<sub>2</sub>N<sub>2</sub>O<sub>3</sub> (M+H)<sup>+</sup>: 529.1080; Found: 529.1075.

**5-(4-acetylphenyl)-3,4-diethyl-5-hydroxy-N-(pyridin-2-ylmethyl)-1,5-dihydro-2H-pyrrol-2-one (2w)**

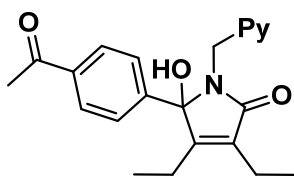

R<sub>f</sub> 0.31 (hexane/EtOAc = 1/2). Pale Yellow Oil. <sup>1</sup>H NMR (CDCl<sub>3</sub>, 399.78 MHz) δ 0.86 (t, *J* = 7.8 Hz, 3H), 1.14 (t, *J* = 7.5 Hz, 3H), 2.19 (dq, *J* = 14.2, 7.8 Hz, 1H), 2.29 (dq, *J* = 14.4, 7.8 Hz, 1H), 2.33 (q, *J* = 7.6 Hz, 2H), 2.61 (s, 3H), 3.88 (d, *J* = 16.5 Hz, 1H), 4.94 (d, *J* = 16.5 Hz, 1H), 7.23 (dd, *J* = 7.3, 5.0 Hz, 1H), 7.35 (d, *J* = 7.8 Hz, 1H), 7.59 (d, *J* = 7.1 Hz, 2H), 7.70 (td, *J* = 7.6, 1.6 Hz, 1H), 7.96 (dd, *J* = 7.3, 1.2 Hz, 2H), 8.47 (dq, *J* = 5.0, 0.7 Hz, 1H), 8.90 (brs, 1H); <sup>13</sup>C NMR (CDCl<sub>3</sub>, 100.53 MHz) δ 13.38, 13.50, 17.05, 18.84, 26.83, 44.75, 91.37, 122.66, 122.78, 126.95, 128.72, 131.89, 137.04, 138.02, 145.28, 148.10, 156.88, 159.21, 171.85, 197.83.; IR (CHCl<sub>3</sub>) 2970 w, 2934 w, 2875 w, 1682 s, 1603 m, 1423 w, 1398 m, 1358 w, 1267 m, 1092 w, 1005 w, 935 w, 842 w, 731 s; HRMS Calcd for C<sub>22</sub>H<sub>25</sub>N<sub>2</sub>O<sub>3</sub> (M+H)<sup>+</sup>: 365.1860; Found: 365.1863.

**3-(4-acetylphenyl)-3-hydroxy-N-(pyridin-2-ylmethyl)-3,4,5,6,7,8-hexahydrocyclohepta[c]pyrrol-1(2H)-one (2x)**

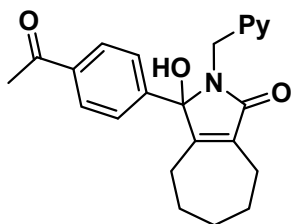

R<sub>f</sub> 0.26 (hexane/EtOAc = 1/2). Pale Yellow Oil. <sup>1</sup>H NMR (CDCl<sub>3</sub>, 399.78 MHz) δ 1.37-1.46 (m, 1H), 1.56-1.68 (m, 3H), 1.70-1.75 (m, 2H), 1.95-2.02 (m, 1H), 2.40-2.52 (m, 3H), 2.61 (s, 3H), 3.89 (d, *J* = 16.2 Hz, 1H), 4.93 (d, *J* = 16.5 Hz, 1H), 7.23 (dd, *J* = 7.3, 5.0 Hz, 1H), 7.35 (d, *J* = 7.8 Hz, 1H), 7.59 (d, *J* = 8.2 Hz, 2H), 7.70 (td, *J* = 7.8, 1.8 Hz, 1H), 7.96 (dd, *J* = 7.6, 1.2 Hz, 2H), 8.47 (dq, *J* = 5.0, 0.9 Hz), 8.97 (brs, 1H); <sup>13</sup>C NMR (CDCl<sub>3</sub>, 100.53 MHz) δ 24.68, 26.85, 27.11, 27.16, 27.24, 30.74, 45.00, 91.00, 122.67, 122.82, 126.93, 128.73, 131.98, 137.09, 138.03, 144.97, 148.15, 156.88, 160.65, 171.88, 197.85.; IR (CHCl<sub>3</sub>) 2924 w, 2851 w, 1681 s, 1603 w, 1425 w, 1401 m, 1360 m, 1267 m, 1161 w, 1009 w, 944 w, 916 w, 843 w, 731 s; HRMS Calcd for C<sub>23</sub>H<sub>25</sub>N<sub>2</sub>O<sub>3</sub> (M+H)<sup>+</sup>: 377.1860; Found: 377.1863.

**5-butylidene-3,4-diphenyl-N-(pyridin-2-ylmethyl)-1,5-dihydro-2H-pyrrol-2-one (3a)**

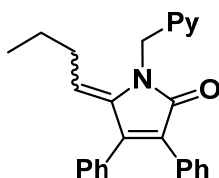

[*Z* isomer]  $R_f$  0.34 (hexane/EtOAc = 1/1). Pale Yellow Amorphous.  $^1\text{H}$  NMR ( $\text{CDCl}_3$ , 399.78 MHz)  $\delta$  0.69 (t,  $J = 7.3$  Hz, 3H), 1.19 (sext,  $J = 7.6$  Hz, 2H), 2.23 (q,  $J = 7.3$  Hz, 2H), 5.09 (t,  $J = 8.2$  Hz, 1H), 5.34 (s, 2H), 7.16-7.26 (m, 7H), 7.36-7.42 (m, 5H), 7.67 (td,  $J = 7.6, 1.6$  Hz, 1H), 8.59 (dq,  $J = 4.8, 0.9$  Hz, 1H);  $^{13}\text{C}$  NMR ( $\text{CDCl}_3$ , 100.53 MHz)  $\delta$  13.66, 23.34, 29.17, 47.19, 119.38, 120.77, 122.25, 127.86, 128.04, 128.11, 128.55, 128.59, 129.72, 130.11, 131.11, 132.64, 137.09, 138.41, 145.84, 149.44, 158.20, 169.92; IR ( $\text{CHCl}_3$ ) 3056 w, 2959 w, 2929 w, 2871 w, 1685 s, 1647 w, 1591 w, 1572 w, 1438 m, 1407 w, 1374 w, 1352 w, 1235 w, 1166 w, 1118 w, 1071 w, 995 w, 943 w, 914 w, 791 w, 729 m, 695 s; HRMS Calcd for  $\text{C}_{26}\text{H}_{25}\text{N}_2\text{O}$  ( $\text{M}+\text{H}$ ) $^+$ : 381.1961; Found: 381.1962.

[*E* isomer]  $R_f$  0.26 (hexane/EtOAc = 1/1). Pale Yellow Oil.  $^1\text{H}$  NMR ( $\text{CDCl}_3$ , 399.78 MHz)  $\delta$  0.54 (t,  $J = 7.4$  Hz, 3H), 1.12 (sext,  $J = 7.3$  Hz, 2H), 1.60 (q,  $J = 7.1$  Hz, 2H), 5.13 (s, 2H), 5.59 (t,  $J = 8.4$  Hz, 1H), 7.18-7.22 (m, 4H), 7.25-7.28 (m, 4H), 7.35-7.40 (m, 5H), 7.67 (td,  $J = 7.8, 1.8$  Hz, 1H), 8.56 (dq,  $J = 4.8, 0.7$  Hz, 1H);  $^{13}\text{C}$  NMR ( $\text{CDCl}_3$ , 100.53 MHz)  $\delta$  13.49, 23.49, 28.83, 45.37, 119.75, 121.92, 122.43, 127.98, 128.01, 128.44, 128.73, 129.24, 129.78, 131.00, 131.98, 134.80, 137.11, 137.52, 142.72, 149.18, 157.75, 167.92; IR ( $\text{CHCl}_3$ ) 3056 w, 2958 w, 2926 w, 2869 w, 1685 s, 1593 w, 1475 w, 1438 w, 1415 w, 1379 w, 1333 w, 1226 w, 1172 w, 1089 w, 996 w, 947 w, 914 w, 750 m, 695 m; HRMS Calcd for  $\text{C}_{26}\text{H}_{25}\text{N}_2\text{O}$  ( $\text{M}+\text{H}$ ) $^+$ : 381.1961; Found: 381.1942.

### 5-methylene-3,4-diphenyl-*N*-(pyridin-2-ylmethyl)-1,5-dihydro-2*H*-pyrrol-2-one (3b)

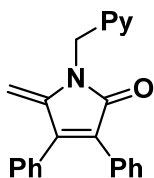

$R_f$  0.29 (hexane/EtOAc = 1/1). Pale Yellow Amorphous.  $^1\text{H}$  NMR ( $\text{CDCl}_3$ , 399.78 MHz)  $\delta$  4.78 (d,  $J = 2.0$  Hz, 1H), 5.10 (d,  $J = 2.3$  Hz, 1H), 5.10 (s, 2H), 7.18 (ddd,  $J = 7.3, 4.8, 0.9$  Hz, 1H), 7.22-7.27 (m, 5H), 7.29 (d,  $J = 8.0$  Hz, 1H), 7.34-7.37 (m, 3H), 7.42-7.46 (m, 2H), 7.65 (td,  $J = 7.6, 1.6$  Hz, 1H), 8.56 (dd,  $J = 4.8, 0.7$  Hz, 1H);  $^{13}\text{C}$  NMR ( $\text{CDCl}_3$ , 100.53 MHz)  $\delta$  45.63, 97.90, 121.82, 122.49, 128.12, 128.27, 128.65, 128.74, 129.69, 129.77, 130.29, 130.57, 131.77, 137.06, 143.13, 145.26, 149.23, 157.10, 168.70; IR ( $\text{CHCl}_3$ ) 3056 w, 2926 w, 1691 s, 1628 m, 1593 w, 1475 w, 1440 m, 1399 m, 1374 w, 1319 w, 1286 w, 1228 w, 1181 w, 1084 w, 1031 w, 996 w, 913 w, 856 w, 798 w, 765 w, 730 m, 696 s; HRMS Calcd for  $\text{C}_{23}\text{H}_{19}\text{N}_2\text{O}$  ( $\text{M}+\text{H}$ ) $^+$ : 339.1492; Found: 339.1489.

### 5-ethylidene-3,4-diphenyl-*N*-(pyridin-2-ylmethyl)-1,5-dihydro-2*H*-pyrrol-2-one (3c)

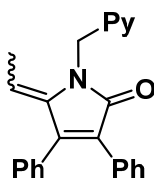

[*Z* isomer]  $R_f$  0.34 (hexane/EtOAc = 1/1). Yellow Pale Solid. Mp = 151-153 °C.  $^1\text{H}$  NMR ( $\text{CDCl}_3$ , 399.78 MHz)  $\delta$  1.84 (d,  $J = 8.0$  Hz, 3H), 5.21 (q,  $J = 8.2$  Hz, 2H), 5.36 (s, 2H), 7.18-7.7.26 (m, 7H), 7.37-7.43 (m, 5H), 7.68 (td,  $J = 7.6$ , 1.6 Hz, 1H), 8.59 (dd,  $J = 3.9$ , 0.9 Hz, 1H);  $^{13}\text{C}$  NMR ( $\text{CDCl}_3$ , 100.53 MHz)  $\delta$  13.16, 47.11, 113.14, 120.82, 122.28, 127.87, 128.05, 128.56, 128.59, 128.64, 129.71, 130.09, 131.07, 132.63, 137.14, 139.58, 145.63, 149.49, 158.31, 169.95; IR ( $\text{CHCl}_3$ ) 3056 w, 2931 w, 2246 w, 1684 s, 1592 w, 1475 w, 1435 m, 1374 w, 1353 w, 1234 w, 1166 w, 1071 w, 995 w, 942 w, 911 w, 789 m, 752 w, 728 s, 695 s; HRMS Calcd for  $\text{C}_{24}\text{H}_{21}\text{N}_2\text{O}$  ( $\text{M}+\text{H}$ ) $^+$ : 353.1648; Found: 353.1635.

[*E* isomer]  $R_f$  0.29 (hexane/EtOAc = 1/1). Pale Yellow Oil.  $^1\text{H}$  NMR ( $\text{CDCl}_3$ , 399.78 MHz)  $\delta$  1.34 (d,  $J = 8.0$  Hz, 3H), 5.11 (s, 2H), 5.68 (q,  $J = 8.0$  Hz, 1H), 7.19-7.22 (m, 4H), 7.25-7.30 (m, 3H), 7.35-7.40 (m, 5H), 7.68 (td,  $J = 7.5$ , 1.6 Hz, 1H), 8.56 (dd,  $J = 4.17$ , 0.7 Hz, 1H);  $^{13}\text{C}$  NMR ( $\text{CDCl}_3$ , 100.53 MHz)  $\delta$  13.43, 45.36, 113.52, 122.03, 122.49, 128.00, 128.03, 128.47, 128.89, 129.29, 129.79, 130.95, 131.98, 134.76, 137.20, 138.03, 142.67, 149.20, 157.73, 167.98; IR ( $\text{CHCl}_3$ ) 3056 w, 2925 s, 2856 w, 1684 s, 1592 w, 1476 w, 1439 w, 1415 w, 1377 w, 1312 w, 1174 w, 996 w, 945 w, 914 w, 822 w, 751 w, 730 w, 695 w; HRMS Calcd for  $\text{C}_{24}\text{H}_{21}\text{N}_2\text{O}$  ( $\text{M}+\text{H}$ ) $^+$ : 353.1648; Found: 353.1628.

### 3,4-diphenyl-5-propylidene-*N*-(pyridin-2-ylmethyl)-1,5-dihydro-2*H*-pyrrol-2-one (3d)

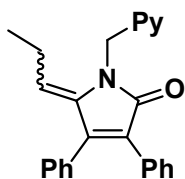

[*Z* isomer]  $R_f$  0.24 (hexane/EtOAc = 1/1). Pale Yellow Oil.  $^1\text{H}$  NMR ( $\text{CDCl}_3$ , 399.78 MHz)  $\delta$  0.80 (t,  $J = 7.7$  Hz, 3H), 2.28 (quin,  $J = 7.3$  Hz, 2H), 5.09 (t,  $J = 8.2$  Hz, 1H), 5.33 (s, 2H), 7.17-7.26 (m, 7H), 7.36-7.42 (m, 5H), 7.67 (td,  $J = 7.8$ , 1.8 Hz, 1H), 8.59 (dq,  $J = 4.6$ , 1.2 Hz, 1H);  $^{13}\text{C}$  NMR ( $\text{CDCl}_3$ , 100.53 MHz)  $\delta$  14.57, 20.73, 47.16, 120.73, 122.23, 127.84, 128.03, 128.18, 128.54, 128.57, 128.59, 129.70, 130.10, 131.09, 132.59, 137.07, 137.87, 145.86, 149.46, 158.15, 169.87; IR ( $\text{CHCl}_3$ ) 3056 w, 3016 w, 2966 w, 2931 w, 2873 w, 1685 s, 1646 w, 1591 w, 1436 m, 1407 w, 1374 w, 1233 w, 1168 w, 1119 w, 1072 w, 1030 w, 995 w, 944 w, 913 w, 794 w, 752 w, 728 m, 695 m; HRMS Calcd for  $\text{C}_{25}\text{H}_{23}\text{N}_2\text{O}$  ( $\text{M}+\text{H}$ ) $^+$ : 367.1805; Found: 367.1791.

[*E* isomer]  $R_f$  0.19 (hexane/EtOAc = 1/1). Pale Yellow Amorphous.  $^1\text{H}$  NMR ( $\text{CDCl}_3$ , 399.78 MHz)  $\delta$  0.73 (t,  $J = 7.5$  Hz, 3H), 1.66 (quin,  $J = 7.3$  Hz, 2H), 5.12 (s, 2H), 5.57 (t,  $J = 8.2$  Hz, 1H), 7.18-7.21 (m, 4H), 7.25-7.29 (m, 3H), 7.34-7.39 (m, 5H), 7.67 (td,  $J = 7.8$ , 1.8 Hz, 1H), 8.57 (dq,  $J = 4.8$ , 0.7 Hz, 1H);  $^{13}\text{C}$  NMR ( $\text{CDCl}_3$ , 100.53 MHz)  $\delta$  14.73, 20.52, 45.31, 121.10, 121.91, 122.43, 127.96, 127.99, 128.47, 128.73, 129.13, 129.75, 130.94, 132.01, 134.74, 136.96, 137.14, 142.67, 149.13, 157.67, 167.95; IR ( $\text{CHCl}_3$ ) 3056 w, 3014 w, 2965 w, 2931 w, 2872 w, 1681 s, 1638 w, 1592 w, 1476 w, 1438 w, 1415 m, 1380 w, 1336 w, 1223 w, 1173 w, 1089 w, 1030 w, 996 w, 946 w, 914 w, 853 w, 795 w, 751 w, 729 m, 695 m; HRMS Calcd for  $\text{C}_{25}\text{H}_{23}\text{N}_2\text{O}$  ( $\text{M}+\text{H}$ ) $^+$ : 367.1805; Found: 367.1791.

**5-(2-methylpropylidene)-3,4-diphenyl-*N*-(pyridin-2-ylmethyl)-1,5-dihydro-2*H*-pyrrol-2-one**

(3e)

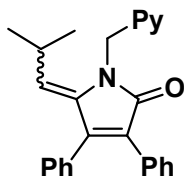

[*Z* isomer]  $R_f$  0.34 (hexane/EtOAc = 1/1). Yellow Solid. Mp = 150-152 °C.  $^1\text{H}$  NMR ( $\text{CDCl}_3$ , 399.78 MHz)  $\delta$  0.76 (d,  $J = 6.4$  Hz, 6H), 2.85-2.98 (m, 1H), 4.92 (d,  $J = 11.2$  Hz, 1H), 5.33 (s, 2H), 7.15-7.25 (m, 7H), 7.36-7.41 (m, 5H), 7.67 (td,  $J = 7.8, 1.8$  Hz, 1H), 8.60 (dq,  $J = 4.8, 0.9$  Hz, 1H);  $^{13}\text{C}$  NMR ( $\text{CDCl}_3$ , 100.53 MHz)  $\delta$  23.37, 26.68, 47.21, 120.74, 122.24, 126.38, 127.86, 128.05, 128.30, 128.55, 128.59, 129.73, 130.20, 131.14, 132.60, 135.99, 137.04, 146.22, 149.47, 158.12, 169.80; IR ( $\text{CHCl}_3$ ) 2964 w, 2927 w, 1686 s, 1647 w, 1591 w, 1439 m, 1408 m, 1373 w, 1233 w, 1166 w, 1072 w, 968 w, 943 w, 912 w, 792 w, 753 m, 727 s, 696 s; HRMS Calcd for  $\text{C}_{26}\text{H}_{25}\text{N}_2\text{O}$  ( $\text{M}+\text{H}$ ) $^+$ : 381.1961; Found: 381.1974.

[*E* isomer]  $R_f$  0.26 (hexane/EtOAc = 1/1). Pale Yellow Oil.  $^1\text{H}$  NMR ( $\text{CDCl}_3$ , 399.78 MHz)  $\delta$  0.69 (d,  $J = 6.4$  Hz, 6H), 1.97-2.07 (m, 1H), 5.13 (s, 2H), 5.38 (d,  $J = 11.0$  Hz, 1H), 7.18-7.21 (m, 4H), 7.25-7.28 (m, 2H), 7.34-7.39 (m, 6H), 7.69 (td,  $J = 7.8, 1.8$  Hz, 1H), 8.57 (dq,  $J = 4.1, 0.7$  Hz, 1H);  $^{13}\text{C}$  NMR ( $\text{CDCl}_3$ , 100.53 MHz)  $\delta$  23.36, 25.83, 45.35, 121.84, 122.39, 126.97, 127.97, 128.01, 128.50, 128.67, 129.07, 129.76, 130.99, 132.15, 134.87, 135.69, 137.06, 142.72, 149.14, 157.73, 167.88; IR ( $\text{CHCl}_3$ ) 3056 w, 2964 w, 2928 w, 2868 w, 1684 s, 1639 w, 1593 w, 1439 w, 1415 w, 1380 w, 1340 w, 1287 w, 1224 w, 1173 w, 1086 w, 995 w, 946 w, 913 w, 863 w, 751 w, 731 m, 695 w; HRMS Calcd for  $\text{C}_{26}\text{H}_{25}\text{N}_2\text{O}$  ( $\text{M}+\text{H}$ ) $^+$ : 381.1961; Found: 381.1961.

**5-(2-methoxyethylidene)-3,4-diphenyl-*N*-(pyridin-2-ylmethyl)-1,5-dihydro-2*H*-pyrrol-2-one (3f)**

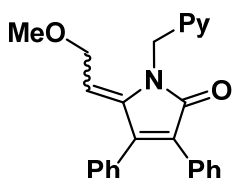

[*Z* isomer]  $R_f$  0.29 (hexane/EtOAc = 1/2). Yellow Oil.  $^1\text{H}$  NMR ( $\text{CDCl}_3$ , 399.78 MHz)  $\delta$  3.18 (s, 3H), 4.12 (d,  $J = 7.1$  Hz, 2H), 5.24 (t,  $J = 7.1$  Hz, 1H), 5.27 (s, 2H), 7.19-7.26 (m, 7H), 7.36-7.39 (m, 3H), 7.40-7.43 (m, 2H), 7.68 (td,  $J = 7.8, 1.8$  Hz, 1H), 8.60 (dq,  $J = 4.8, 1.2$  Hz, 1H);  $^{13}\text{C}$  NMR ( $\text{CDCl}_3$ , 100.53 MHz)  $\delta$  47.02, 58.33, 67.30, 113.12, 120.94, 122.43, 128.10, 128.17, 128.71, 128.74, 129.15, 129.71, 130.00, 130.69, 132.05, 137.18, 140.26, 145.64, 149.54, 157.86, 169.90; IR ( $\text{CHCl}_3$ ) 3057 w, 2927 w, 2819 w, 1697 s, 1594 w, 1440 m, 1409 w, 1191 w, 1159 w, 1084 w, 943 w, 755 w, 729 w, 696 m; HRMS Calcd for  $\text{C}_{25}\text{H}_{23}\text{N}_2\text{O}_2$  ( $\text{M}+\text{H}$ ) $^+$ : 383.1754; Found: 383.1773.



[*E* isomer]  $R_f$  0.23 (hexane/EtOAc = 1/2). Yellow Amorphous.  $^1\text{H}$  NMR ( $\text{CDCl}_3$ , 399.78 MHz)  $\delta$  2.95 (s, 3H), 3.43 (d,  $J = 7.3$  Hz, 2H), 5.13 (s, 2H), 5.68 (t,  $J = 7.4$  Hz, 1H), 7.18-7.23 (m, 4H), 7.26-7.29 (m, 3H), 7.36-7.41 (m, 5H), 7.67 (td,  $J = 7.8, 1.8$  Hz, 1H), 8.57 (dq,  $J = 5.0, 0.9$  Hz, 1H);  $^{13}\text{C}$  NMR ( $\text{CDCl}_3$ , 100.53 MHz)  $\delta$  45.39, 57.90, 66.79, 113.50, 121.78, 122.53, 128.06, 128.35, 128.82, 128.92, 129.17, 129.78, 130.53, 132.72, 134.15, 137.14, 139.71, 142.22, 149.39, 157.16, 168.23; IR ( $\text{CHCl}_3$ ) 3056 w, 2925 w, 2818 w, 1690 s, 1641 w, 1592 w, 1476 w, 1438 w, 1412 w, 1376 w, 1330 w, 1238 w, 1188 w, 1087 m, 996 w, 944 w, 914 w, 780 w, 752 w, 729 w, 695 m; HRMS Calcd for  $\text{C}_{25}\text{H}_{23}\text{N}_2\text{O}_2$  ( $\text{M}+\text{H}$ ) $^+$ : 383.1754; Found: 383.1746.

**5-benzylidene-3,4-diphenyl-*N*-(pyridin-2-ylmethyl)-1,5-dihydro-2*H*-pyrrol-2-one (3h)**

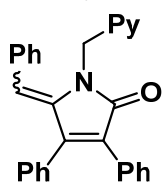

[*Z* isomer]  $R_f$  0.40 (hexane/EtOAc = 1/1). Pale Yellow Solid. Mp = 142-143 °C.  $^1\text{H}$  NMR ( $\text{CDCl}_3$ , 399.78 MHz)  $\delta$  4.96 (s, 2H), 6.18 (s, 1H), 6.79 (d,  $J = 7.8$  Hz, 1H), 6.95 (dt,  $J = 7.1, 0.9$  Hz, 2H), 7.05 (dd,  $J = 6.6, 5.0$  Hz, 1H), 7.09-7.26 (m, 5H), 7.35-7.53 (m, 8H), 8.35 (dq,  $J = 3.9, 0.7$  Hz, 1H);  $^{13}\text{C}$  NMR ( $\text{CDCl}_3$ , 100.53 MHz)  $\delta$  47.50, 115.86, 120.33, 121.57, 127.73, 127.93, 128.09, 128.40, 128.70, 128.75, 129.10, 129.16, 129.80, 130.15, 130.89, 132.39, 134.54, 136.25, 139.47, 146.23, 149.12, 156.93, 170.97; IR ( $\text{CHCl}_3$ ) 3056 w, 2927 w, 2361 w, 2248 w, 1693 s, 1633 w, 1592 w, 1573 w, 1487w, 1441 w, 1402 w, 1370 w, 1331 w, 1236 w, 1208 w, 1160 w, 1076 w, 1028 w, 996 w, 944 w, 913 w, 792 w, 750 w, 727 m, 696 m; HRMS Calcd for  $\text{C}_{29}\text{H}_{23}\text{N}_2\text{O}$  ( $\text{M}+\text{H}$ ) $^+$ : 415.1805; Found: 415.1789.

[*E* isomer]  $R_f$  0.26 (hexane/EtOAc = 1/1). Pale Yellow Amorphous.  $^1\text{H}$  NMR ( $\text{CDCl}_3$ , 399.78 MHz)  $\delta$  5.24 (s, 2H), 6.72 (d,  $J = 8.0$  Hz, 2H), 6.79-6.83 (m, 3H), 6.86-6.94 (m, 4H), 7.01 (tt,  $J = 6.4, 1.4$  Hz, 1H), 7.20-7.30 (m, 7H), 7.38 (d,  $J = 8.0$  Hz, 1H), 7.71 (td,  $J = 7.6, 1.6$  Hz, 1H), 8.59 (dq,  $J = 4.1, 0.9$  Hz, 1H);  $^{13}\text{C}$  NMR ( $\text{CDCl}_3$ , 100.53 MHz)  $\delta$  45.79, 116.91, 122.05, 122.61, 126.79, 127.21, 127.73, 127.99, 128.03, 128.13, 129.72, 129.95, 130.29, 130.78, 132.82, 133.04, 133.97, 137.22, 138.40, 142.63, 149.36, 157.43, 168.29; IR ( $\text{CHCl}_3$ ) 3055 w, 2926 w, 1687 s, 1624 w, 1592 w, 1476 w, 1440 w, 1409 w, 1377 w, 1334 w, 1212 w, 1163 w, 1076 w, 1028 w, 996 w, 947 w, 913 w, 842 w, 795 w, 754 m, 730 m, 696 m; HRMS Calcd for  $\text{C}_{29}\text{H}_{23}\text{N}_2\text{O}$  ( $\text{M}+\text{H}$ ) $^+$ : 415.1805; Found: 415.1782.

**5-butylidene-3,4-diphenyl-*N*-(quinolin-8-yl)-1,5-dihydro-2*H*-pyrrol-2-one (5)**

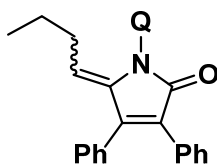

[isomer 1]  $R_f$  0.34 (hexane/EtOAc = 1/1). White Amorphous.  $^1\text{H}$  NMR ( $\text{CDCl}_3$ , 399.78 MHz)  $\delta$  0.39 (t,  $J = 7.3$  Hz, 3H), 0.85-1.05 (m, 2H), 1.21 (sextd,  $J = 8.0, 1.6$  Hz, 1H), 1.39 (sextd,  $J = 8.4, 1.6$  Hz, 1H), 5.14 (t,  $J = 8.0$  Hz, 1H), 7.18-7.23 (m, 3H), 7.37-7.39 (m, 5H), 7.43 (q,  $J = 4.1$  Hz, 1H), 7.46-7.48 (m, 2H), 7.64 (dd,  $J = 8.2, 7.3$  Hz, 1H), 7.81 (dd,  $J = 7.3, 1.4$  Hz, 1H), 7.92 (dd,  $J = 8.2, 1.4$  Hz, 1H), 8.21 (dd,  $J = 8.2, 1.6$  Hz, 1H), 8.98 (dd,  $J = 4.1, 1.6$  Hz, 1H);  $^{13}\text{C}$  NMR ( $\text{CDCl}_3$ , 100.53 MHz)  $\delta$  13.58, 22.69, 28.85, 118.68, 121.81, 126.28, 127.63, 127.86, 128.24, 128.43, 128.50, 128.51, 129.02, 129.28, 129.94, 130.29, 130.74, 131.37, 132.86, 135.71, 136.29, 140.06, 145.77, 151.23, 169.93; IR ( $\text{CHCl}_3$ ) 3055 w, 2959 w, 2929 w, 2870 w, 2245 w, 1688 m, 1647 w, 1596 w, 1500 w, 1474 w, 1406 w, 1371 w, 1259 w, 1212 w, 1176 w, 1121 w, 1074 w, 1029 w, 908 m, 829 w, 802 w, 789 w, 726 s, 694 m; HRMS Calcd for  $\text{C}_{29}\text{H}_{25}\text{N}_2\text{O}$  ( $\text{M}+\text{H}$ ) $^+$ : 417.1961; Found: 417.1930.

[isomer 2]  $R_f$  0.23 (hexane/EtOAc = 1/1). Pale Yellow Oil.  $^1\text{H}$  NMR ( $\text{CDCl}_3$ , 399.78 MHz)  $\delta$  0.54 (t,  $J = 7.4$  Hz, 3H), 1.07 (sext,  $J = 7.6$  Hz, 2H), 1.62 (qd,  $J = 7.3, 1.6$  Hz, 2H), 5.04 (t,  $J = 8.5$  Hz, 1H), 7.17-7.21 (m, 3H), 7.40-7.48 (m, 8H), 7.68 (dd,  $J = 8.0, 7.3$  Hz, 1H), 7.79 (dd,  $J = 7.3, 1.6$  Hz, 1H), 7.94 (dd,  $J = 8.2, 1.6$  Hz, 1H), 8.214 (dd,  $J = 8.5, 1.8$  Hz, 1H), 8.98 (dd,  $J = 4.1, 1.8$  Hz, 1H);  $^{13}\text{C}$  NMR ( $\text{CDCl}_3$ , 100.53 MHz)  $\delta$  13.60, 23.42, 28.90, 119.81, 121.79, 126.48, 127.83, 127.91, 128.36, 128.68, 128.73, 129.13, 129.47, 129.51, 129.55, 129.59, 129.68, 129.98, 130.08, 131.68, 133.40, 135.09, 136.37, 140.17, 151.19; IR ( $\text{CHCl}_3$ ) 3055 w, 2958 w, 2927 w, 2869 w, 1689 s, 1596 w, 1499 w, 1475 w, 1443 w, 1428 w, 1406 w, 1372 w, 1216 w, 1143 w, 1100 w, 1071 w, 1029 w, 911 w, 806 w, 729 m, 695 m; HRMS Calcd for  $\text{C}_{29}\text{H}_{25}\text{N}_2\text{O}$  ( $\text{M}+\text{H}$ ) $^+$ : 417.1961; Found: 417.1947.

### 3,4,5-triphenyl-*N*-(pyridin-2-ylmethyl)-1,5-dihydro-2*H*-pyrrol-2-one (6)

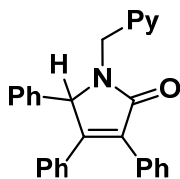

$R_f$  0.17 (hexane/EtOAc = 1/1). Colorless Oil.  $^1\text{H}$  NMR ( $\text{CDCl}_3$ , 399.78 MHz)  $\delta$  4.00 (d,  $J = 15.3$  Hz, 1H), 5.22 (d,  $J = 15.3$  Hz, 1H), 5.57 (s, 1H), 7.04-7.34 (m, 15H), 7.50 (dq,  $J = 7.6, 1.6$  Hz, 2H), 7.63 (td,  $J = 7.8, 1.8$  Hz, 1H), 8.56 (d,  $J = 4.3$  Hz, 1H);  $^{13}\text{C}$  NMR ( $\text{CDCl}_3$ , 100.53 MHz)  $\delta$  46.15, 66.80, 122.46, 122.98, 128.24, 128.35, 128.43, 128.68, 128.71, 128.77, 129.06, 129.07, 129.89, 131.55, 132.07, 132.92, 135.25, 136.96, 149.44, 153.20, 157.39, 170.44; IR ( $\text{CHCl}_3$ ) 3059 w, 2924 w, 2242 w, 1680 s, 1590 w, 1492 w, 1431 w, 1403 m, 1351 w, 1316 w, 1206 w, 1073 w, 996 w, 944 w, 912 m, 840 w, 782 w, 730 s, 696 s; HRMS Calcd for  $\text{C}_{28}\text{H}_{23}\text{N}_2\text{O}$  ( $\text{M}+\text{H}$ ) $^+$ : 403.1805; Found: 403.17995.

## VIII. X-ray structure and data of compound **3h-Z**

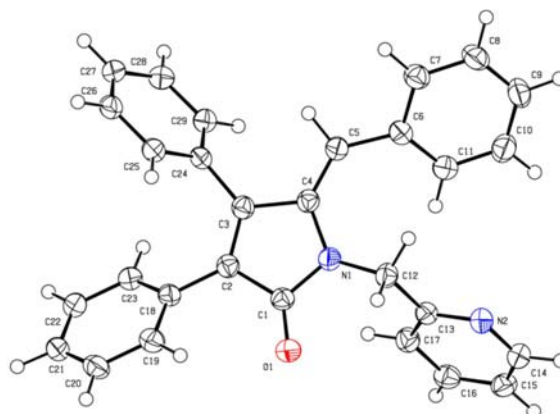

**Figure S1.** The structure of **3h-Z** was determined by the X-ray diffraction.

CCDC-1898257 contains the supplementary crystallographic data of compound **3h-Z**. X-Ray crystallographic structure analysis of *Z*-5-benzylidene-3,4-diphenyl-*N*-(pyridin-2-ylmethyl) -1,5-dihydro-2H-pyrrol-2-one (**3h-Z**) was performed on Rigaku R-Axis RAPID imaging plate diffractometer with graphite monochromated Cu-K $\alpha$  radiation. The data were collected at a temperature of  $-150 \pm 1$  °C to a maximum  $2\theta$  value of  $148.6^\circ$ . A total of 2428 oscillation images were collected. A sweep of data was done using  $\omega$  scans from  $-12.0$  to  $14.0^\circ$  in  $0.50^\circ$  step, at  $\chi = -33.0^\circ$  and  $\phi = 26.0^\circ$ . The structure was solved by direct methods (SIR92)<sup>15</sup> and expanded using Fourier techniques. All non-hydrogen atoms were refined anisotropically and all hydrogen atoms were placed using riding model. The crystal data are mentioned below:

### Crystal Data:

|                      |                                                                                                                                                                                           |
|----------------------|-------------------------------------------------------------------------------------------------------------------------------------------------------------------------------------------|
| Empirical Formula    | C <sub>29</sub> H <sub>22</sub> N <sub>2</sub> O                                                                                                                                          |
| Formula Weight       | 414.51                                                                                                                                                                                    |
| Crystal Color, Habit | pale yellow, prism                                                                                                                                                                        |
| Crystal Dimensions   | 0.600 × 0.250 × 0.250 mm                                                                                                                                                                  |
| Crystal System       | triclinic                                                                                                                                                                                 |
| Lattice Type         | Primitive                                                                                                                                                                                 |
| Lattice Parameters   | $a = 9.8127(3)$ Å<br>$b = 9.8576(3)$ Å<br>$c = 12.3569(4)$ Å<br>$\alpha = 95.274(3)^\circ$<br>$\beta = 96.148(3)^\circ$<br>$\gamma = 115.124(3)^\circ$<br>$V = 1063.36(7)$ Å <sup>3</sup> |

|                   |                         |
|-------------------|-------------------------|
| Space Group       | P-1 (#2)                |
| Z value           | 2                       |
| D <sub>calc</sub> | 1.294 g/cm <sup>3</sup> |
| F <sub>000</sub>  | 436.00                  |
| μ(CuKα)           | 6.158 cm <sup>-1</sup>  |

**Table S3.** Bond lengths (Å)

| atom | atom | distance   | atom | atom | distance   |
|------|------|------------|------|------|------------|
| O1   | C1   | 1.225(2)   | N1   | C1   | 1.389(2)   |
| N1   | C4   | 1.406(2)   | N1   | C12  | 1.4624(19) |
| N2   | C13  | 1.3438(19) | N2   | C14  | 1.332(2)   |
| C1   | C2   | 1.474(2)   | C2   | C3   | 1.359(2)   |
| C2   | C18  | 1.474(2)   | C3   | C4   | 1.476(2)   |
| C3   | C24  | 1.481(2)   | C4   | C5   | 1.349(3)   |
| C5   | C6   | 1.476(2)   | C6   | C7   | 1.401(2)   |
| C6   | C11  | 1.398(2)   | C7   | C8   | 1.388(3)   |
| C8   | C9   | 1.380(3)   | C9   | C10  | 1.392(3)   |
| C10  | C11  | 1.386(3)   | C12  | C13  | 1.512(2)   |
| C13  | C17  | 1.3861(17) | C14  | C15  | 1.3866(19) |
| C15  | C16  | 1.383(2)   | C16  | C17  | 1.387(2)   |
| C18  | C19  | 1.405(3)   | C18  | C23  | 1.388(2)   |
| C19  | C20  | 1.391(3)   | C20  | C21  | 1.382(2)   |
| C21  | C22  | 1.388(3)   | C22  | C23  | 1.385(2)   |
| C24  | C25  | 1.401(2)   | C24  | C29  | 1.390(3)   |
| C25  | C26  | 1.382(2)   | C26  | C27  | 1.386(3)   |
| C27  | C28  | 1.390(3)   | C28  | C29  | 1.390(2)   |

**Table S4.** Bond angles (°)

| atom | atom | atom | angle      | atom | atom | atom | angle      |
|------|------|------|------------|------|------|------|------------|
| C1   | N1   | C4   | 110.37(13) | C1   | N1   | C12  | 118.26(15) |
| C4   | N1   | C12  | 127.87(13) | C13  | N2   | C14  | 117.56(11) |
| O1   | C1   | N1   | 123.56(14) | O1   | C1   | C2   | 129.60(16) |
| N1   | C1   | C2   | 106.80(14) | C1   | C2   | C3   | 107.91(14) |
| C1   | C2   | C18  | 122.75(15) | C3   | C2   | C18  | 129.33(15) |
| C2   | C3   | C4   | 109.03(14) | C2   | C3   | C24  | 125.96(15) |
| C4   | C3   | C24  | 124.92(15) | N1   | C4   | C3   | 105.62(14) |
| N1   | C4   | C5   | 130.97(14) | C3   | C4   | C5   | 123.39(15) |
| C4   | C5   | C6   | 132.40(15) | C5   | C6   | C7   | 117.66(14) |
| C5   | C6   | C11  | 123.90(14) | C7   | C6   | C11  | 118.16(16) |
| C6   | C7   | C8   | 121.05(16) | C7   | C8   | C9   | 120.09(17) |
| C8   | C9   | C10  | 119.60(19) | C9   | C10  | C11  | 120.54(17) |
| C6   | C11  | C10  | 120.52(16) | N1   | C12  | C13  | 114.83(10) |
| N2   | C13  | C12  | 113.01(11) | N2   | C13  | C17  | 123.07(14) |
| C12  | C13  | C17  | 123.86(13) | N2   | C14  | C15  | 123.44(14) |
| C14  | C15  | C16  | 118.44(15) | C15  | C16  | C17  | 119.04(12) |
| C13  | C17  | C16  | 118.43(14) | C2   | C18  | C19  | 120.52(14) |
| C2   | C18  | C23  | 120.69(17) | C19  | C18  | C23  | 118.79(15) |
| C18  | C19  | C20  | 119.96(15) | C19  | C20  | C21  | 120.4(2)   |
| C20  | C21  | C22  | 120.03(17) | C21  | C22  | C23  | 119.82(16) |
| C18  | C23  | C22  | 121.03(19) | C3   | C24  | C25  | 118.24(16) |
| C3   | C24  | C29  | 122.70(15) | C25  | C24  | C29  | 118.98(15) |
| C24  | C25  | C26  | 120.29(18) | C25  | C26  | C27  | 120.63(17) |
| C26  | C27  | C28  | 119.36(16) | C27  | C28  | C29  | 120.34(19) |
| C24  | C29  | C28  | 120.36(17) |      |      |      |            |

**VIII. Copies of <sup>1</sup>H and <sup>13</sup>C NMR Spectra**

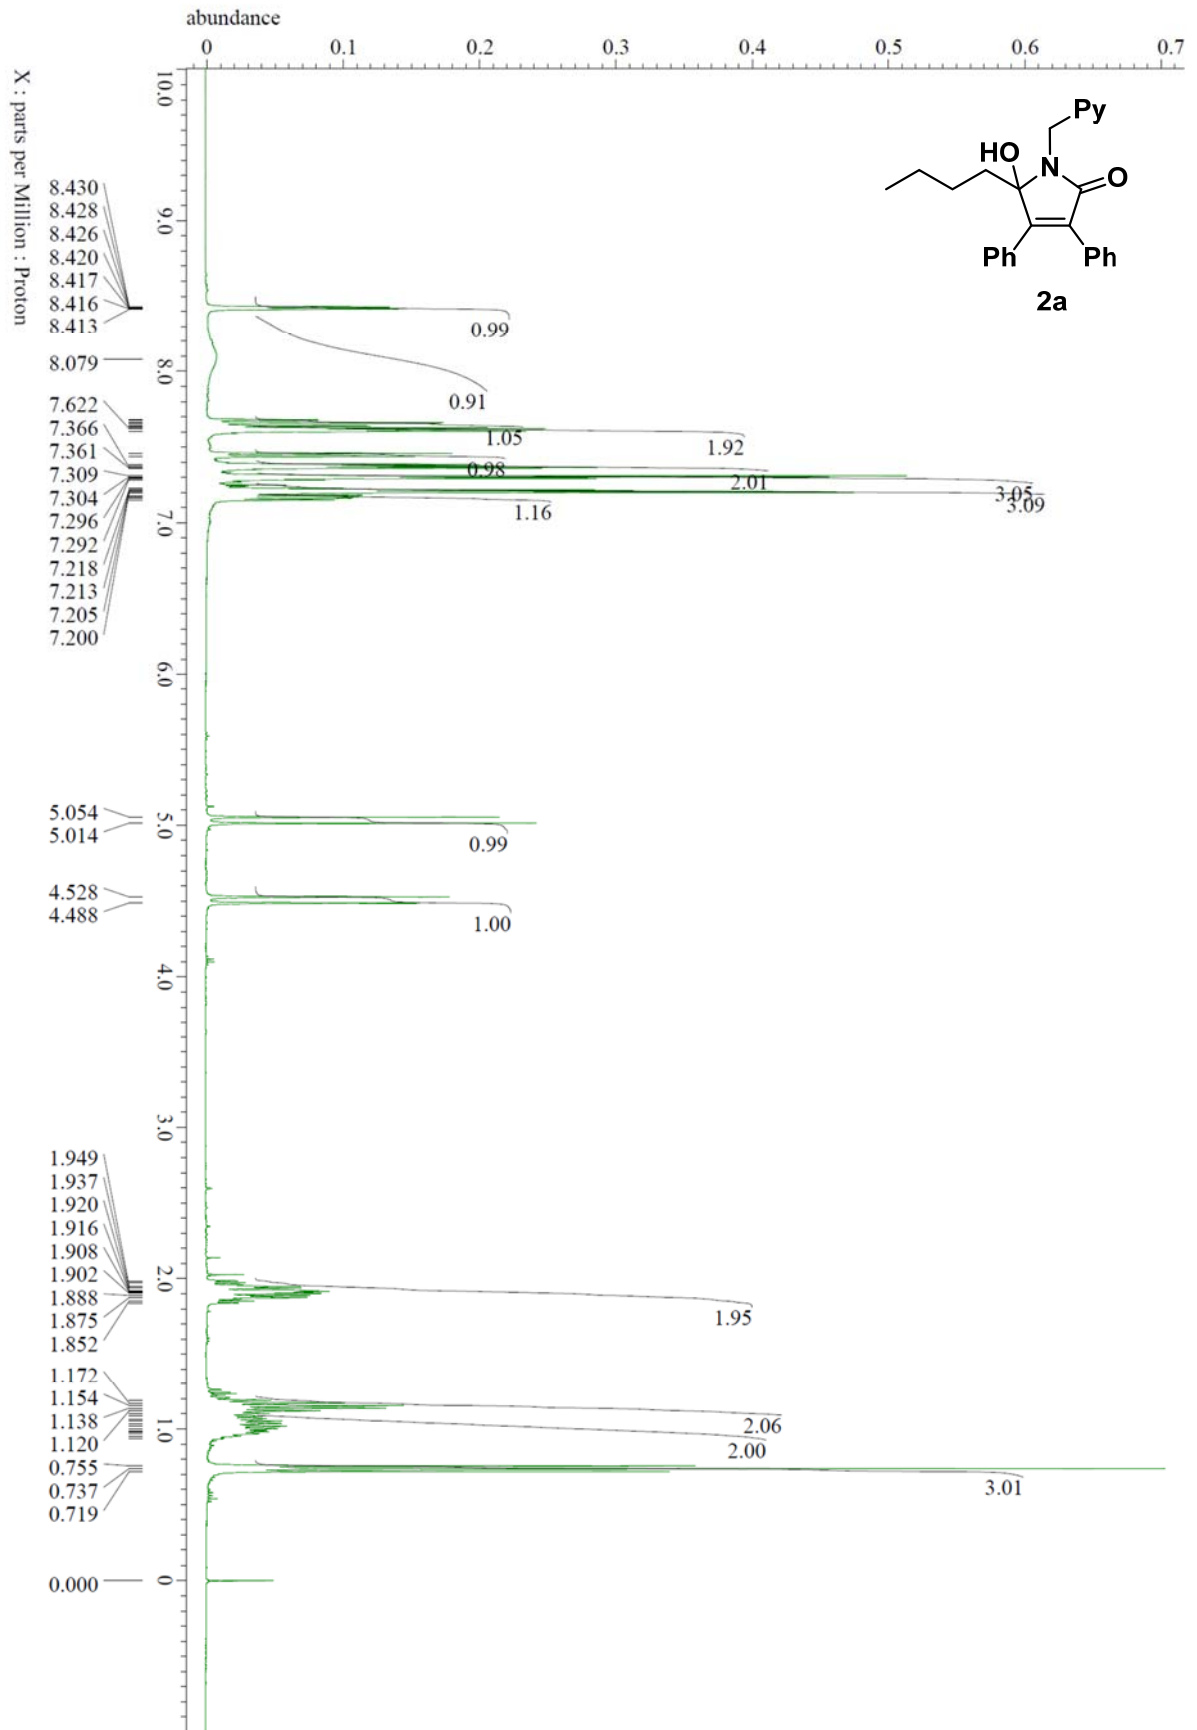

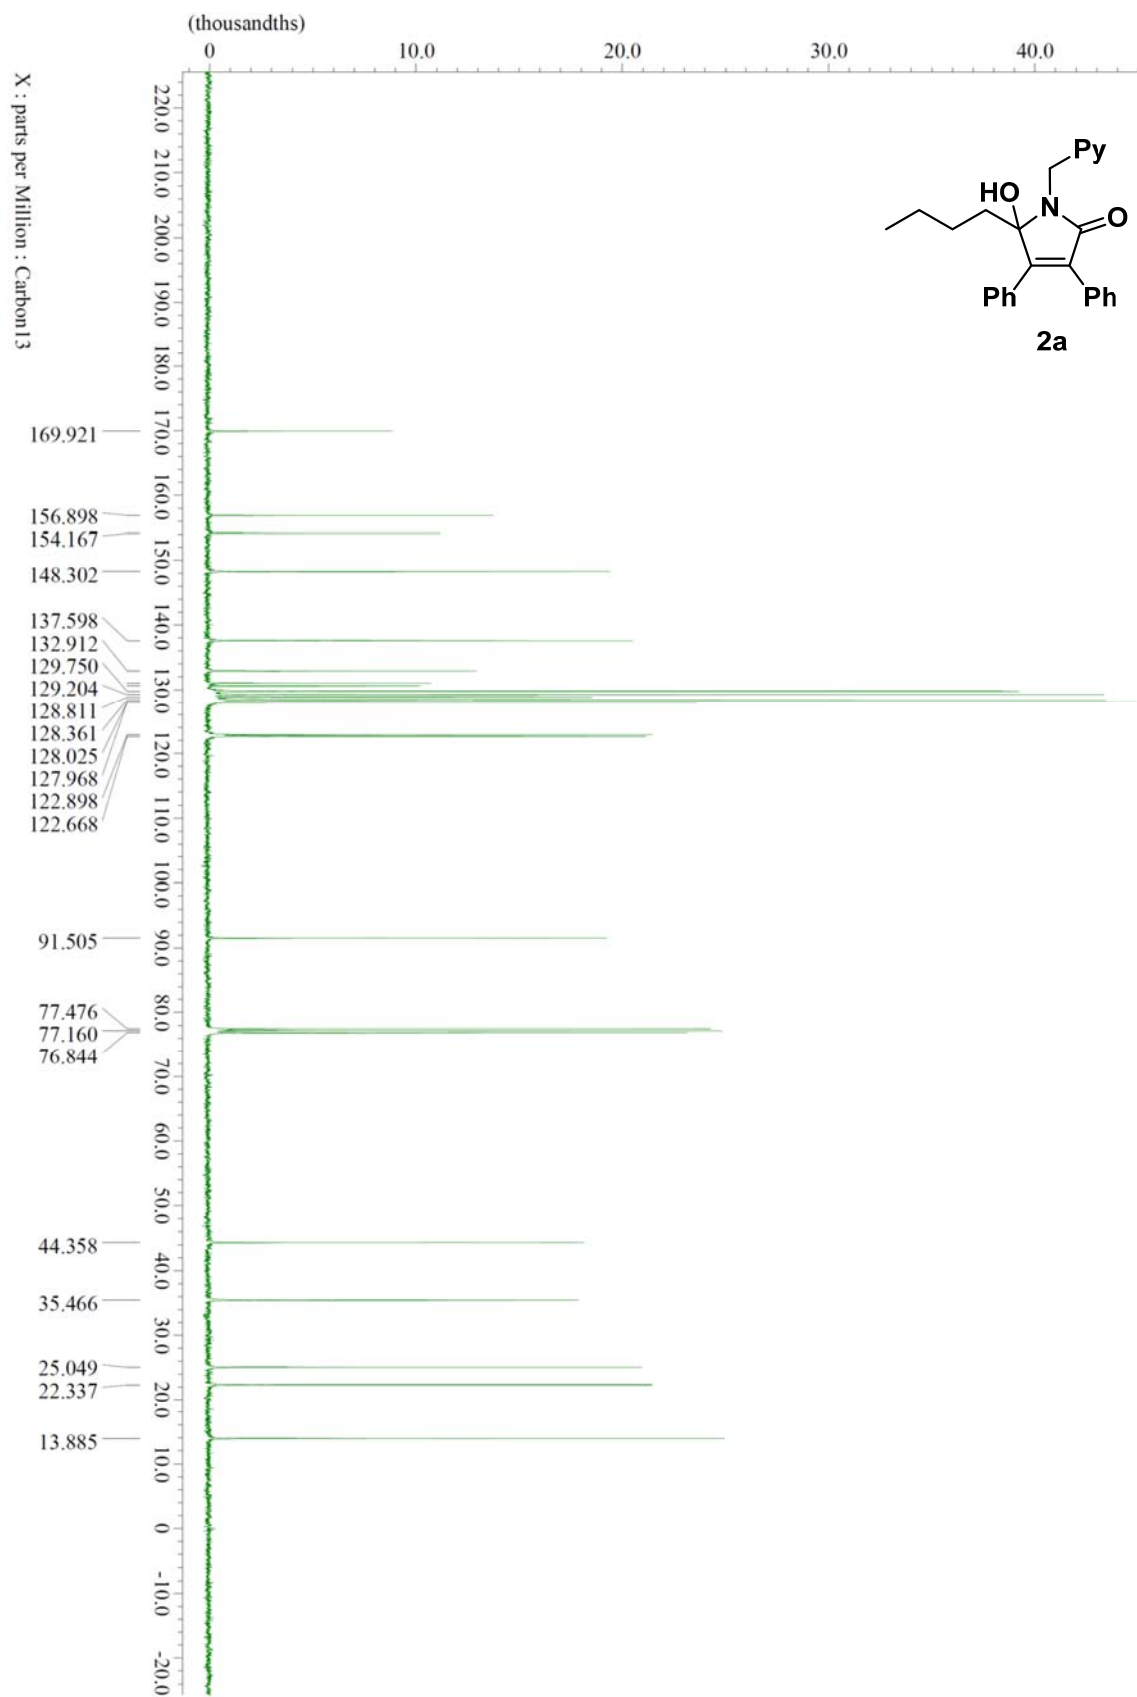

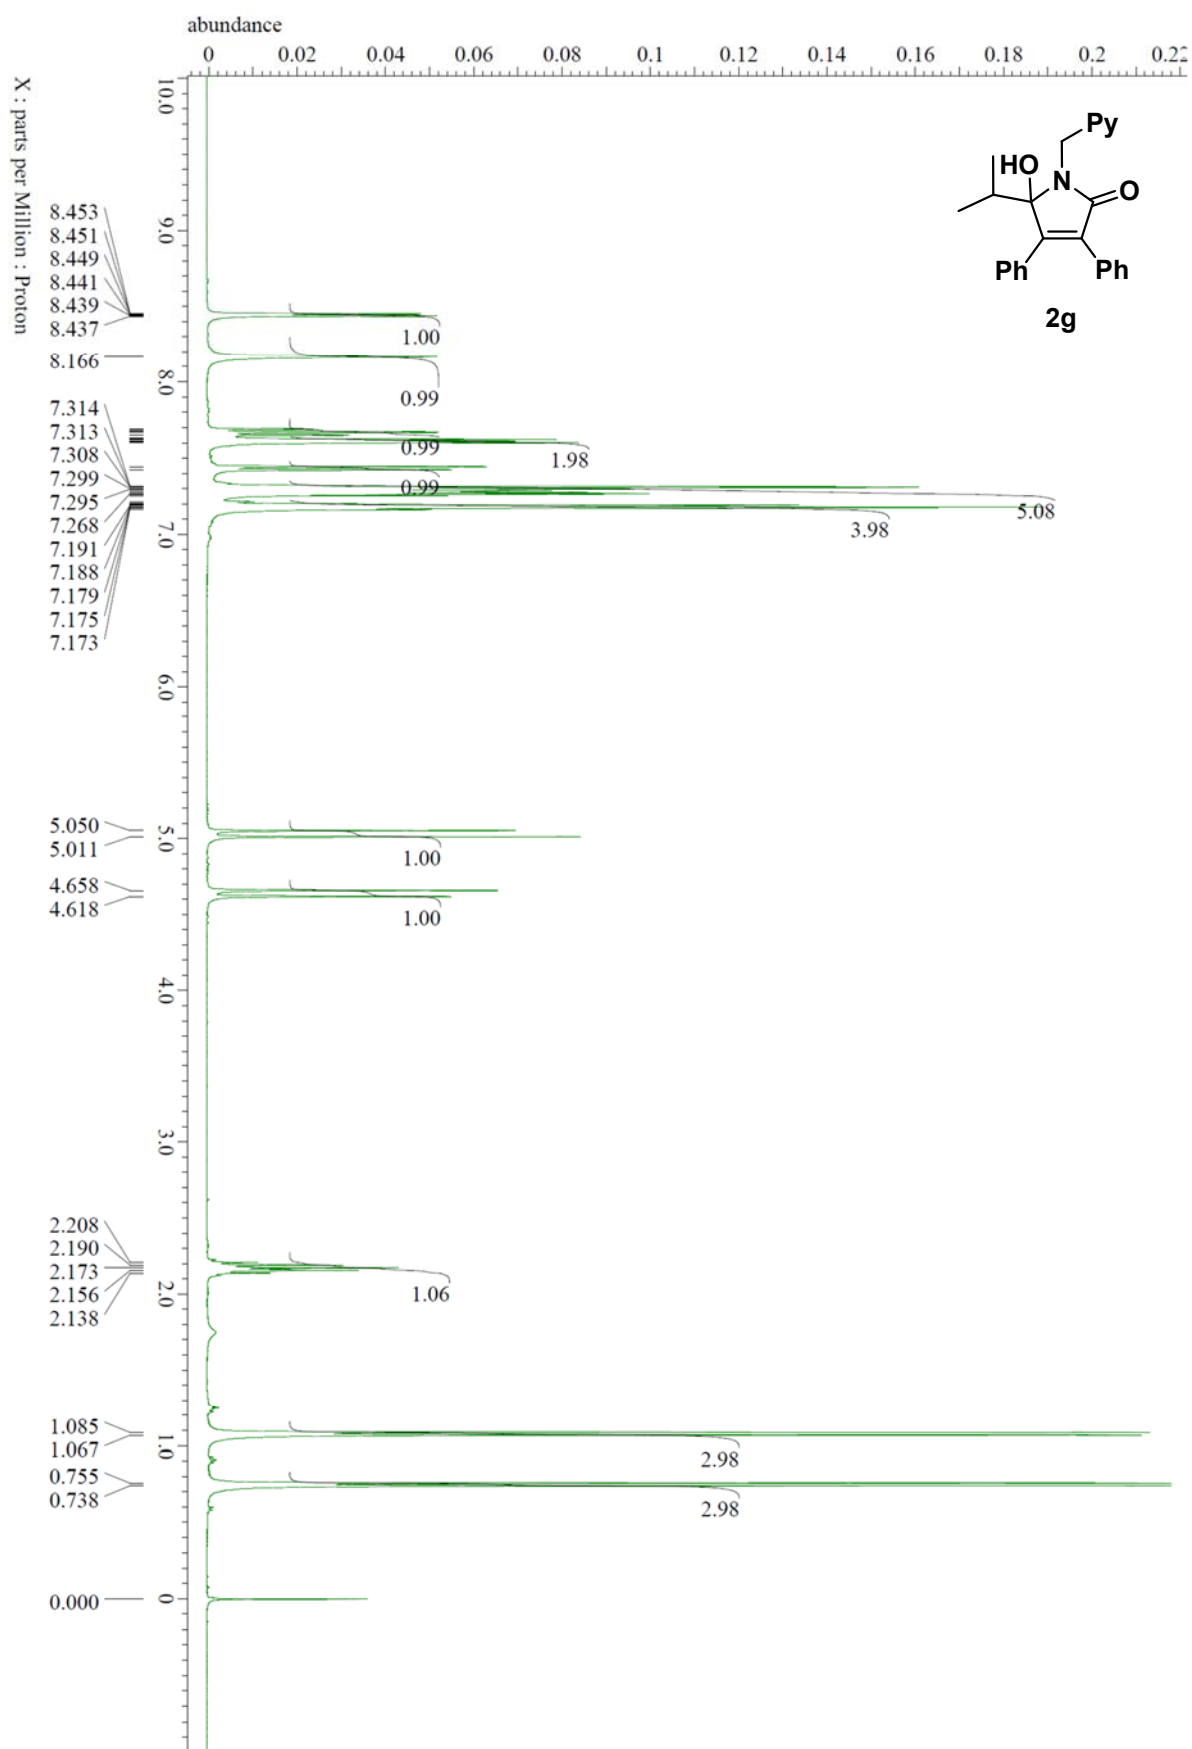



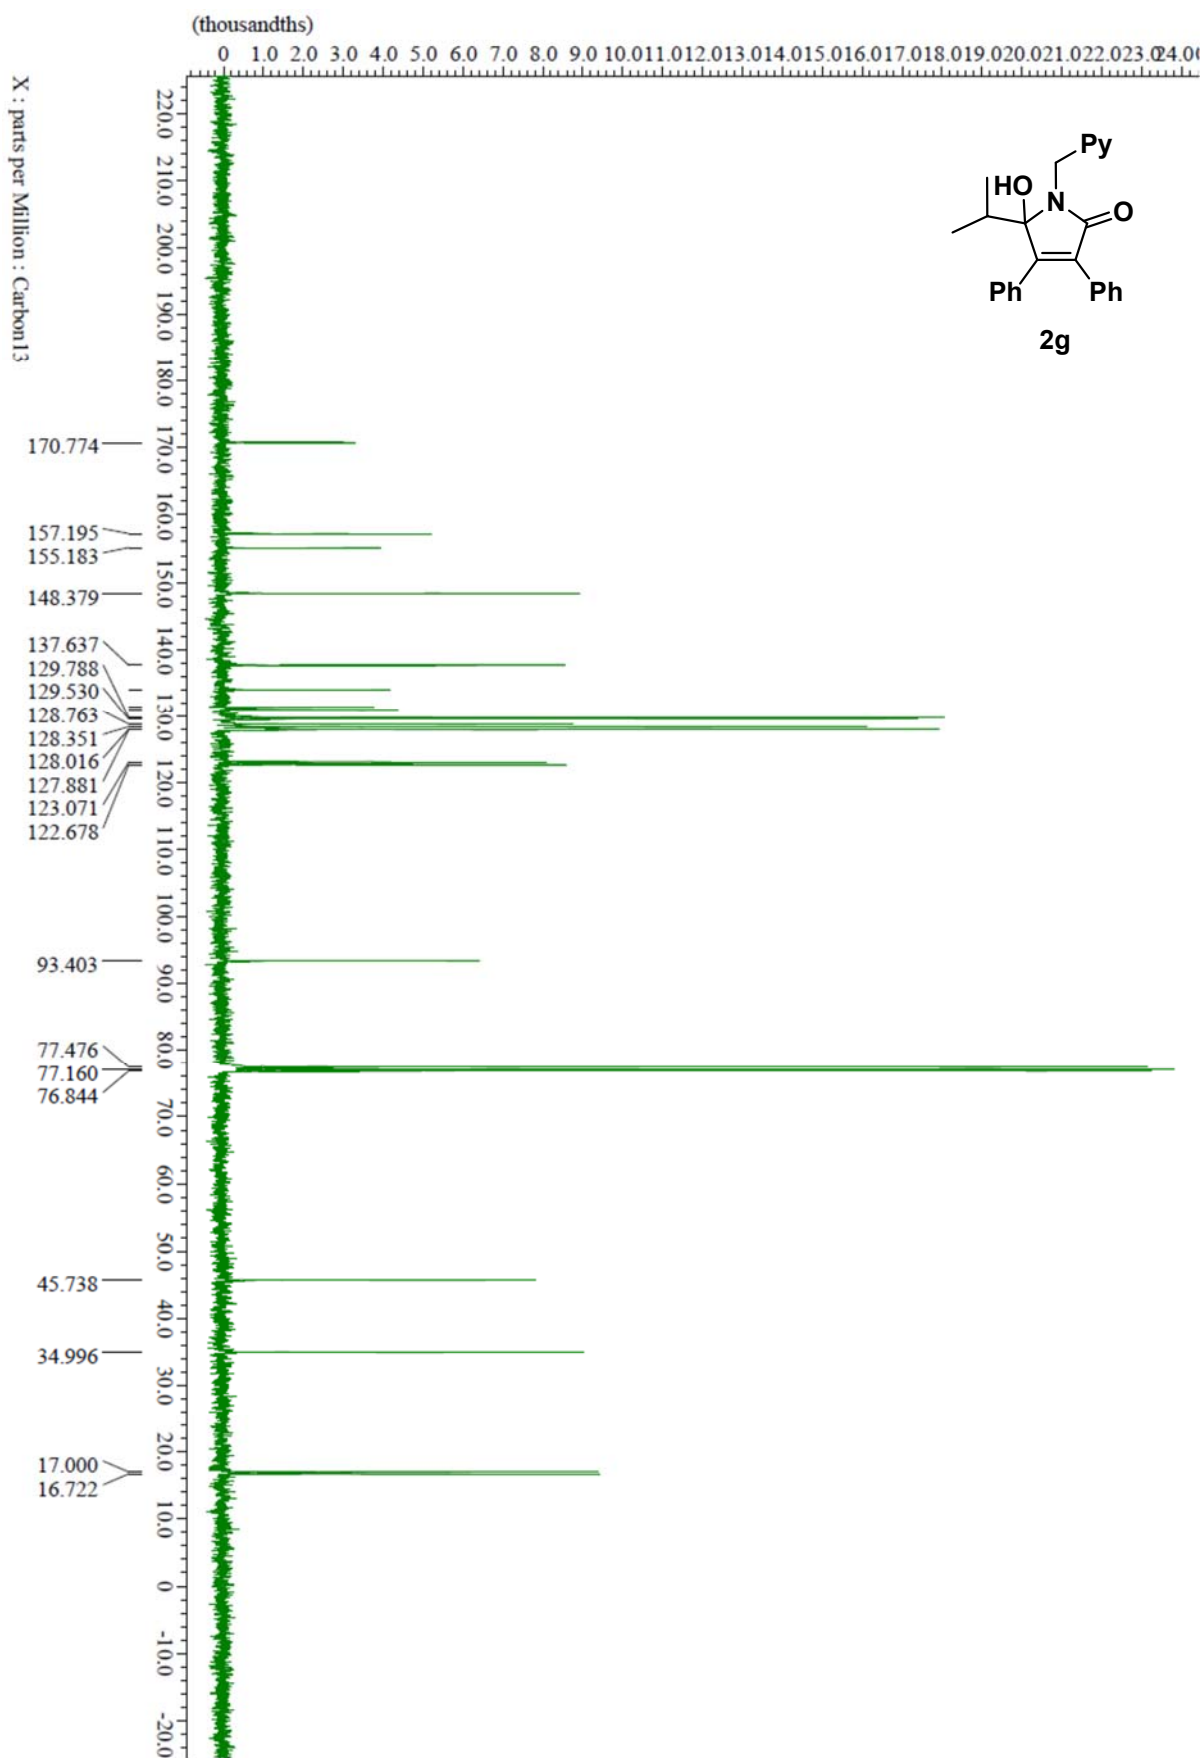

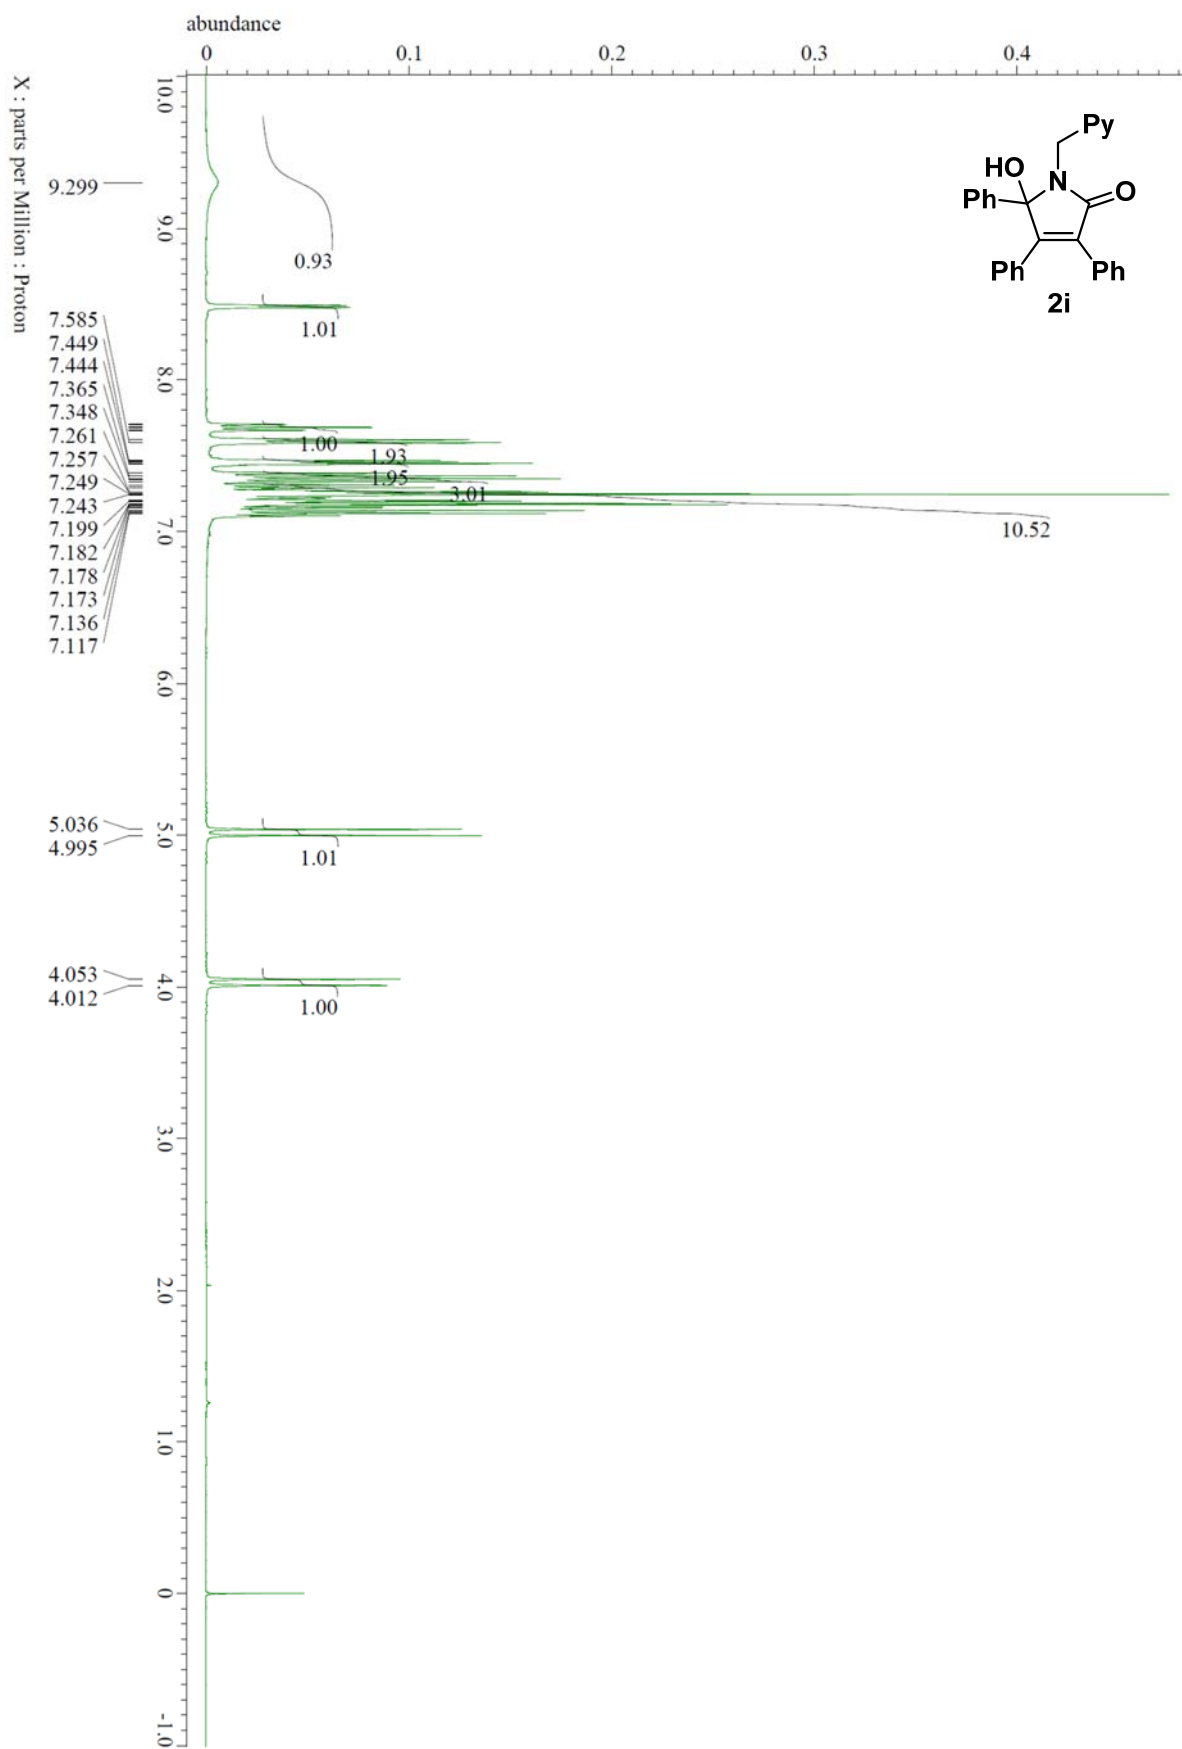

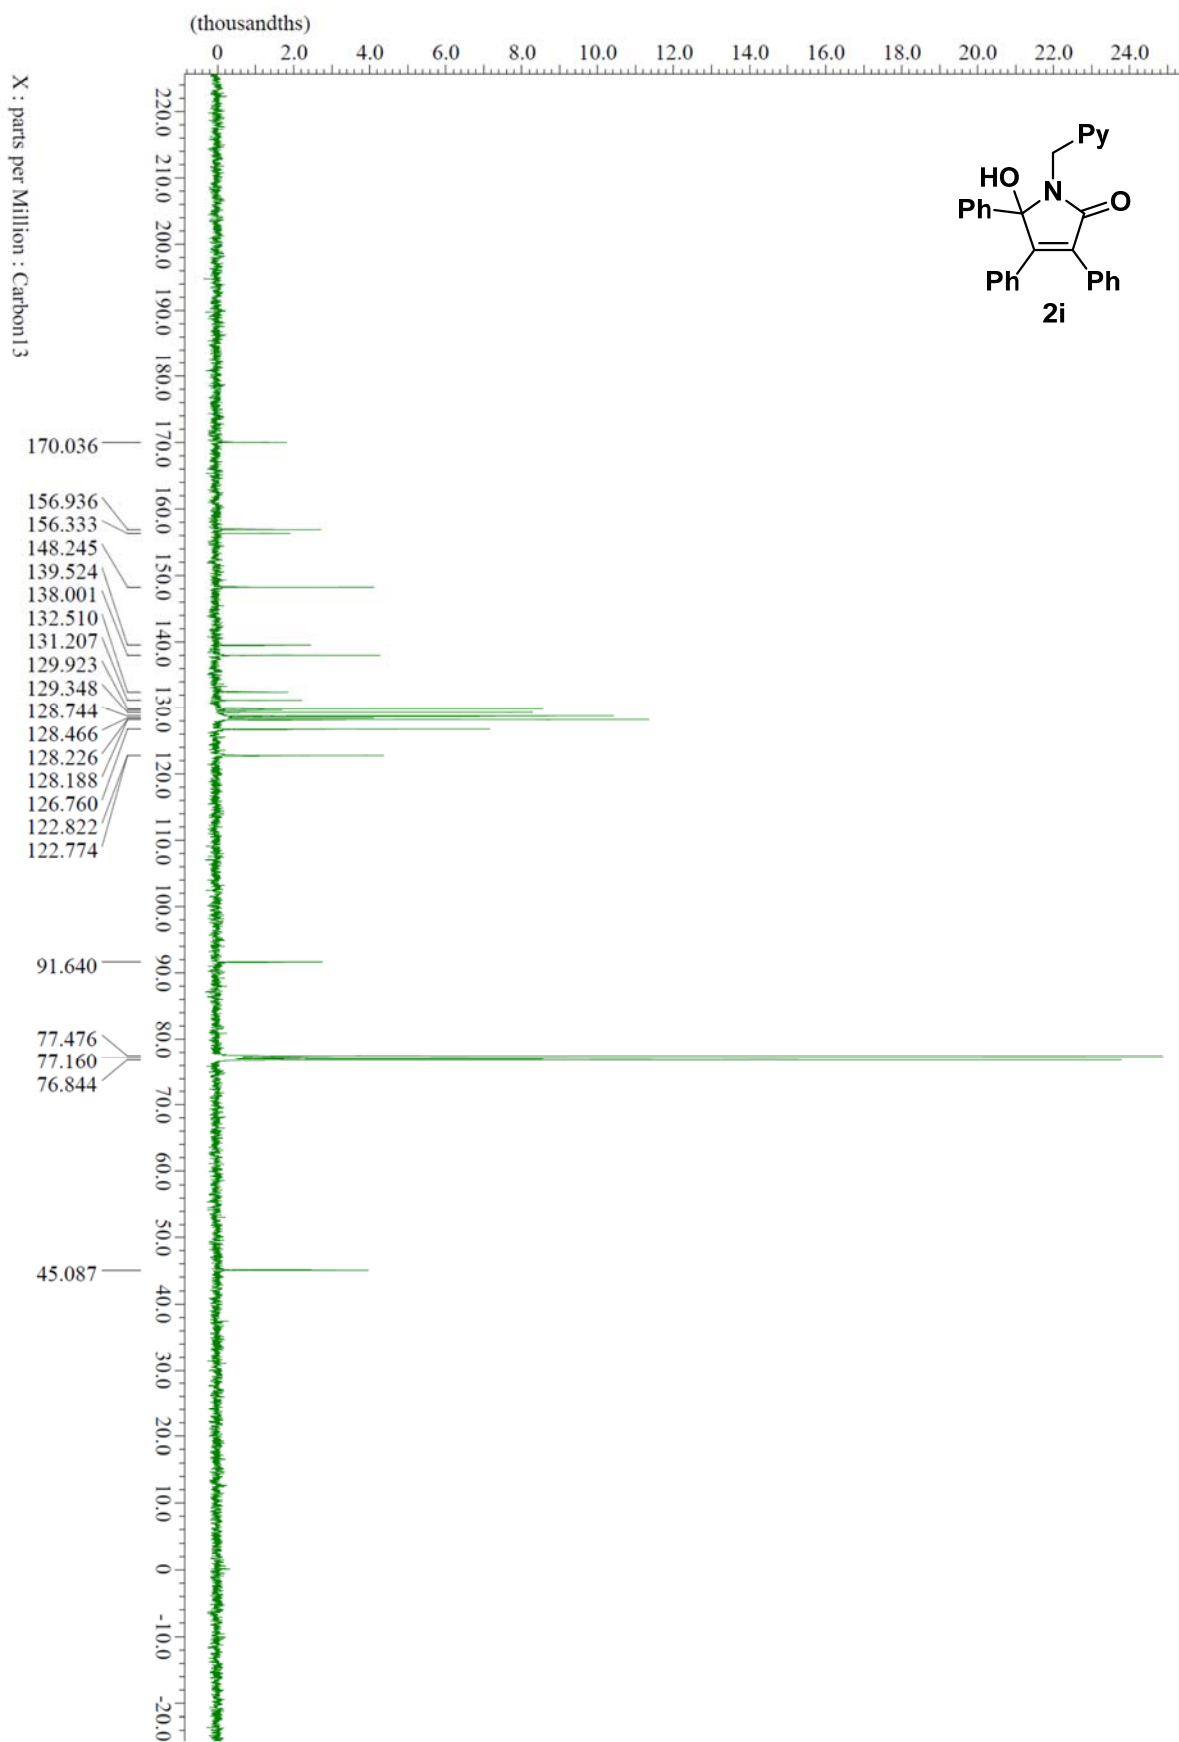

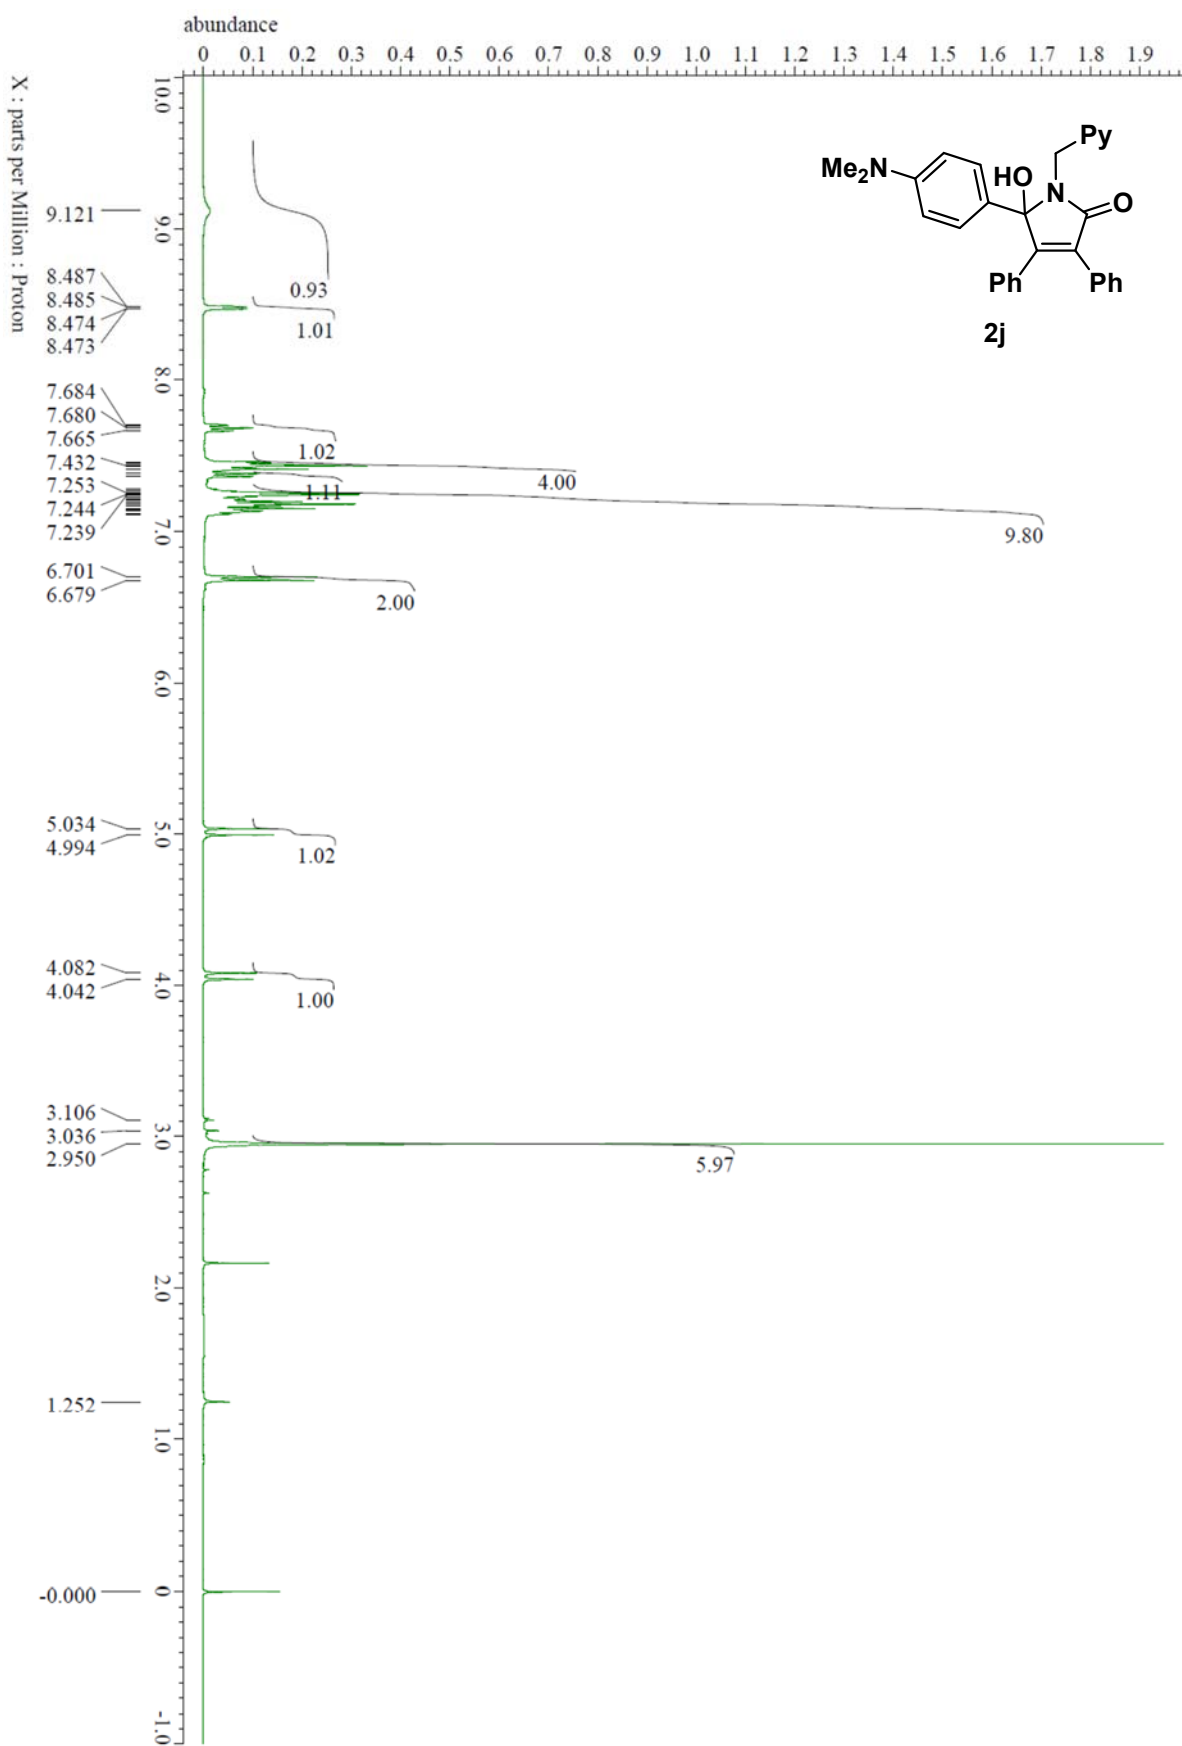

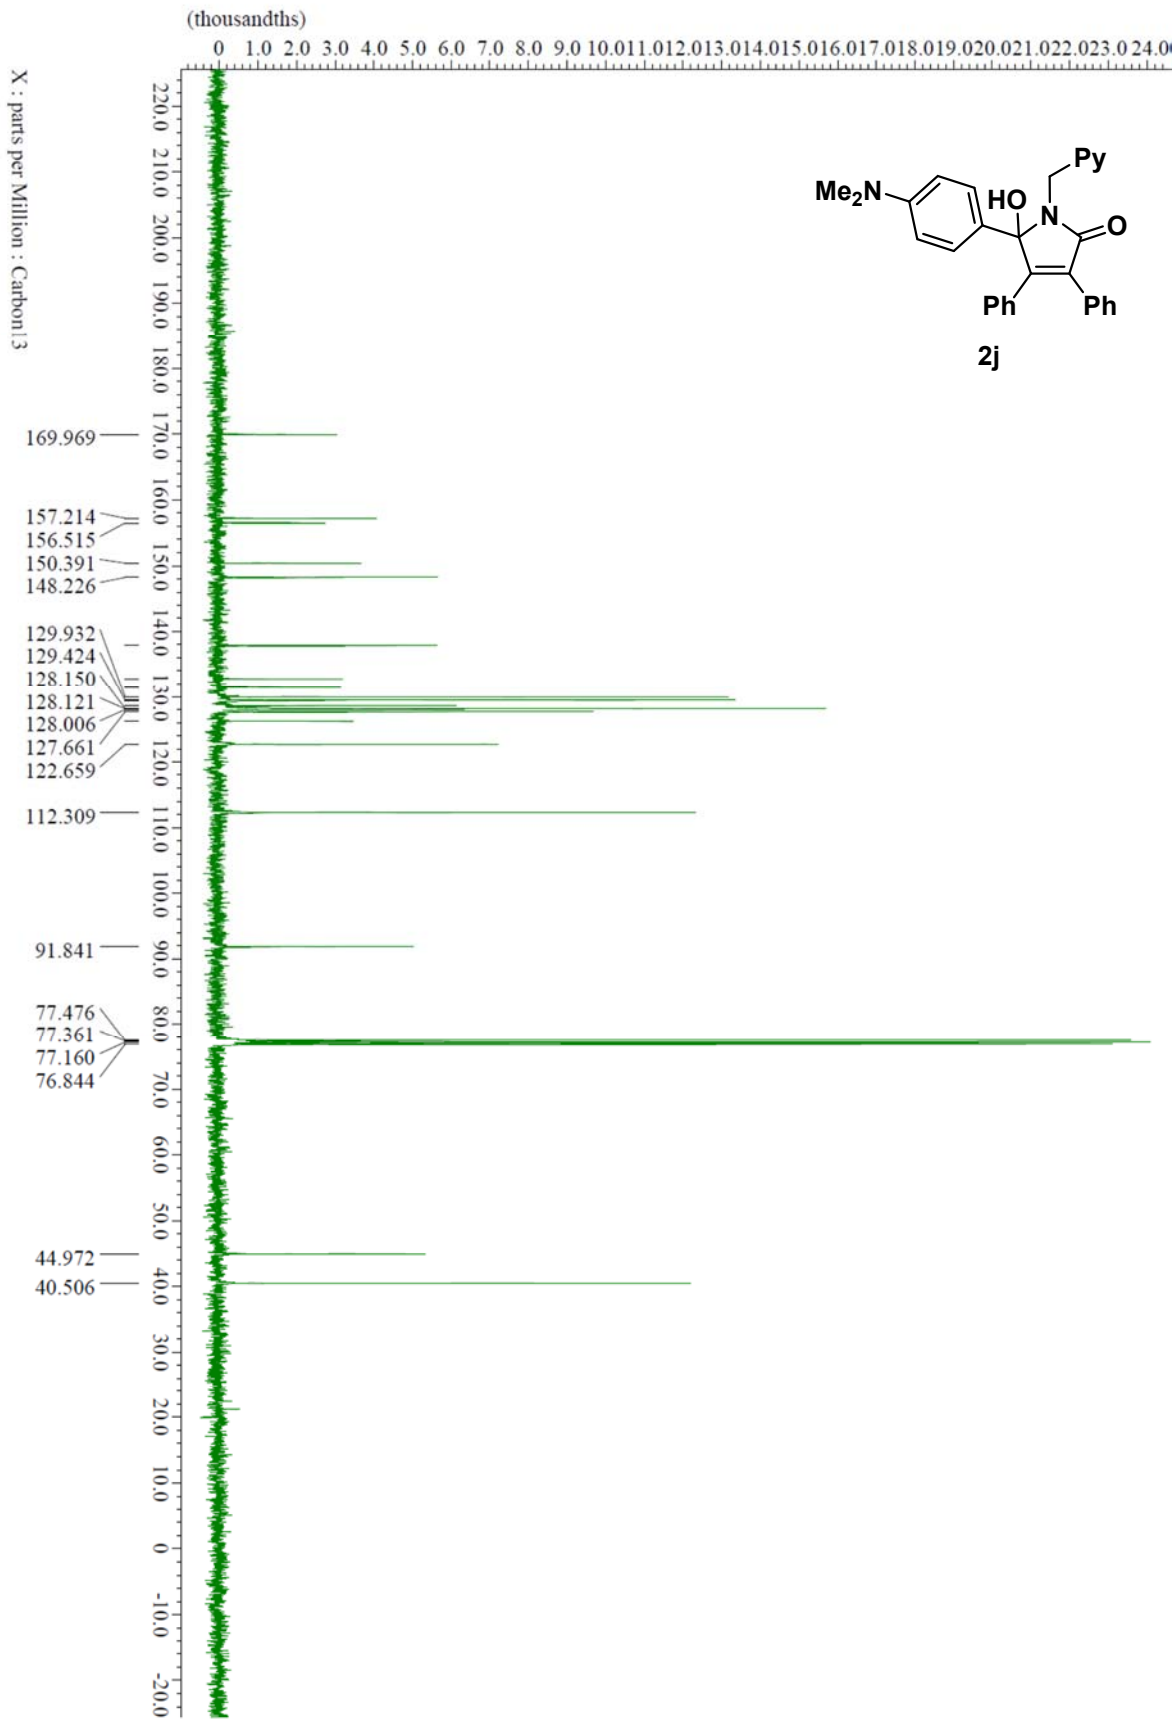

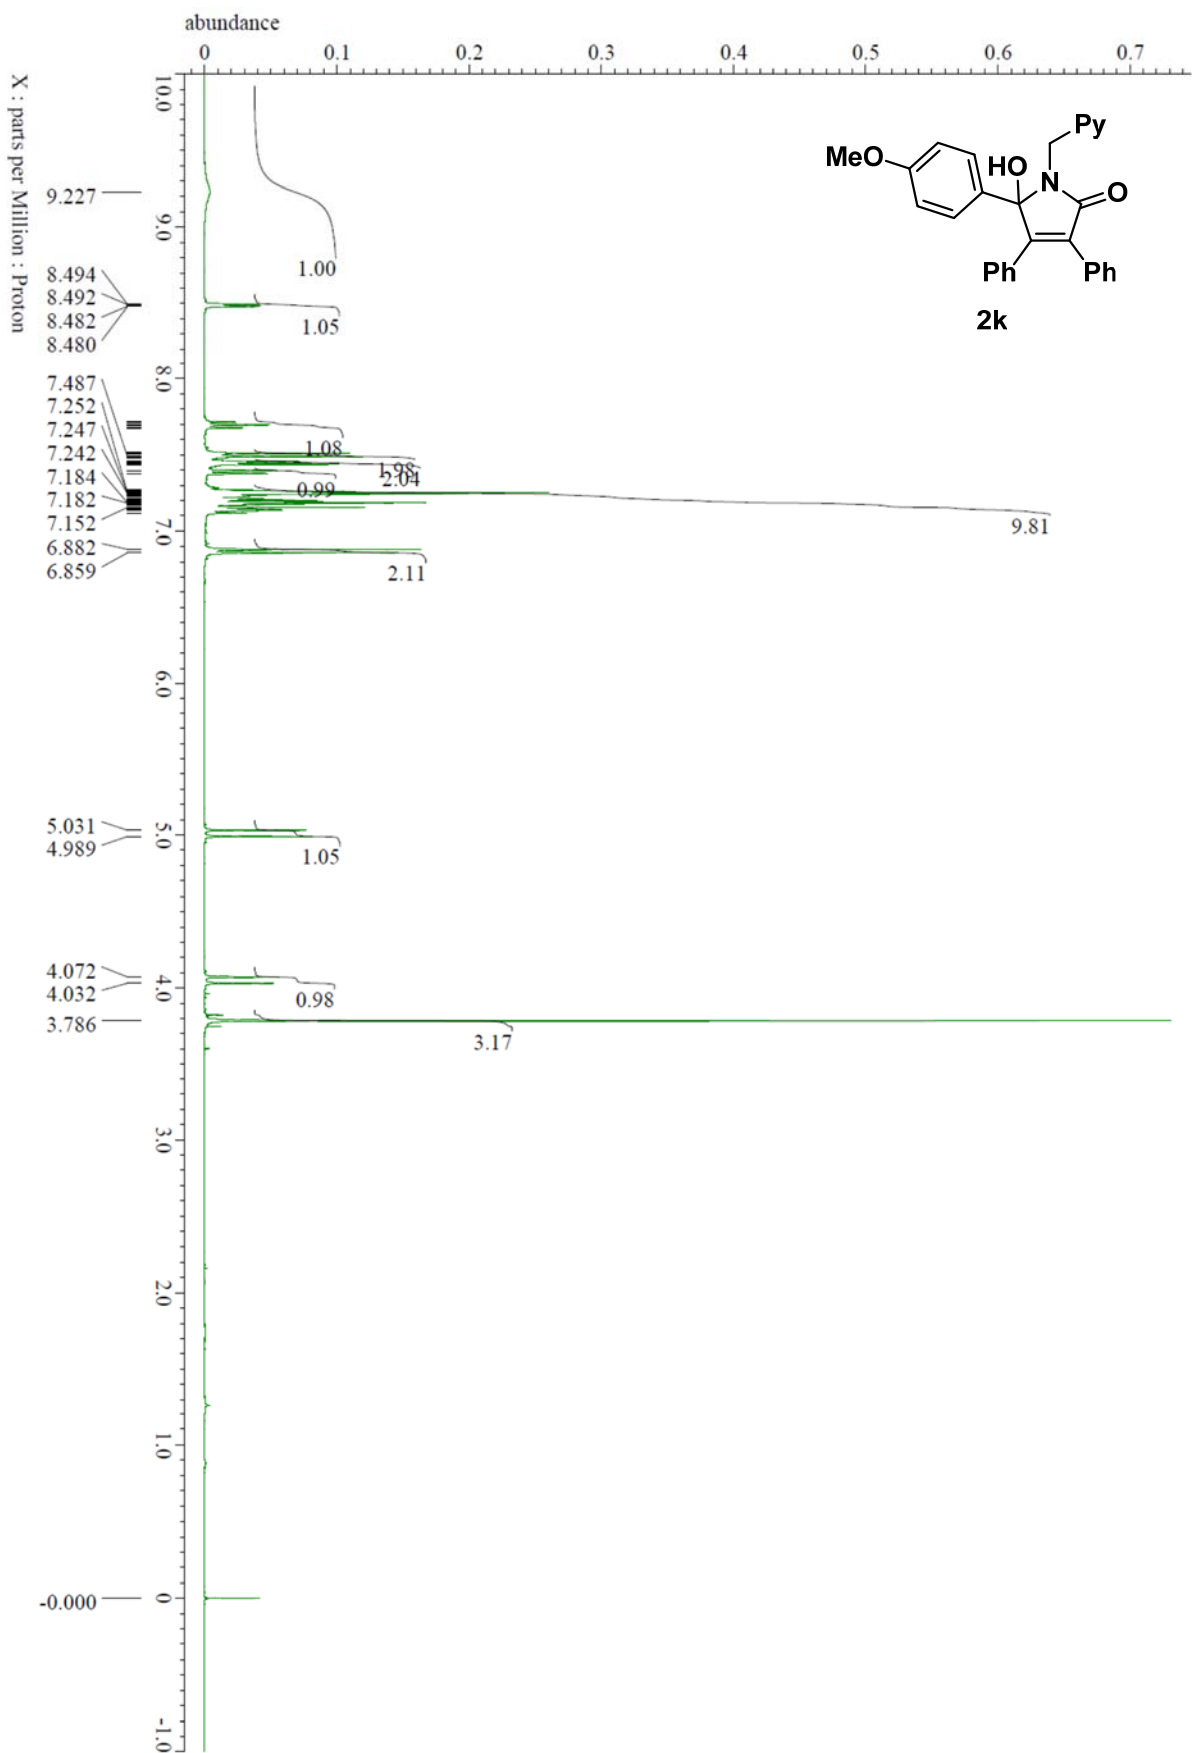

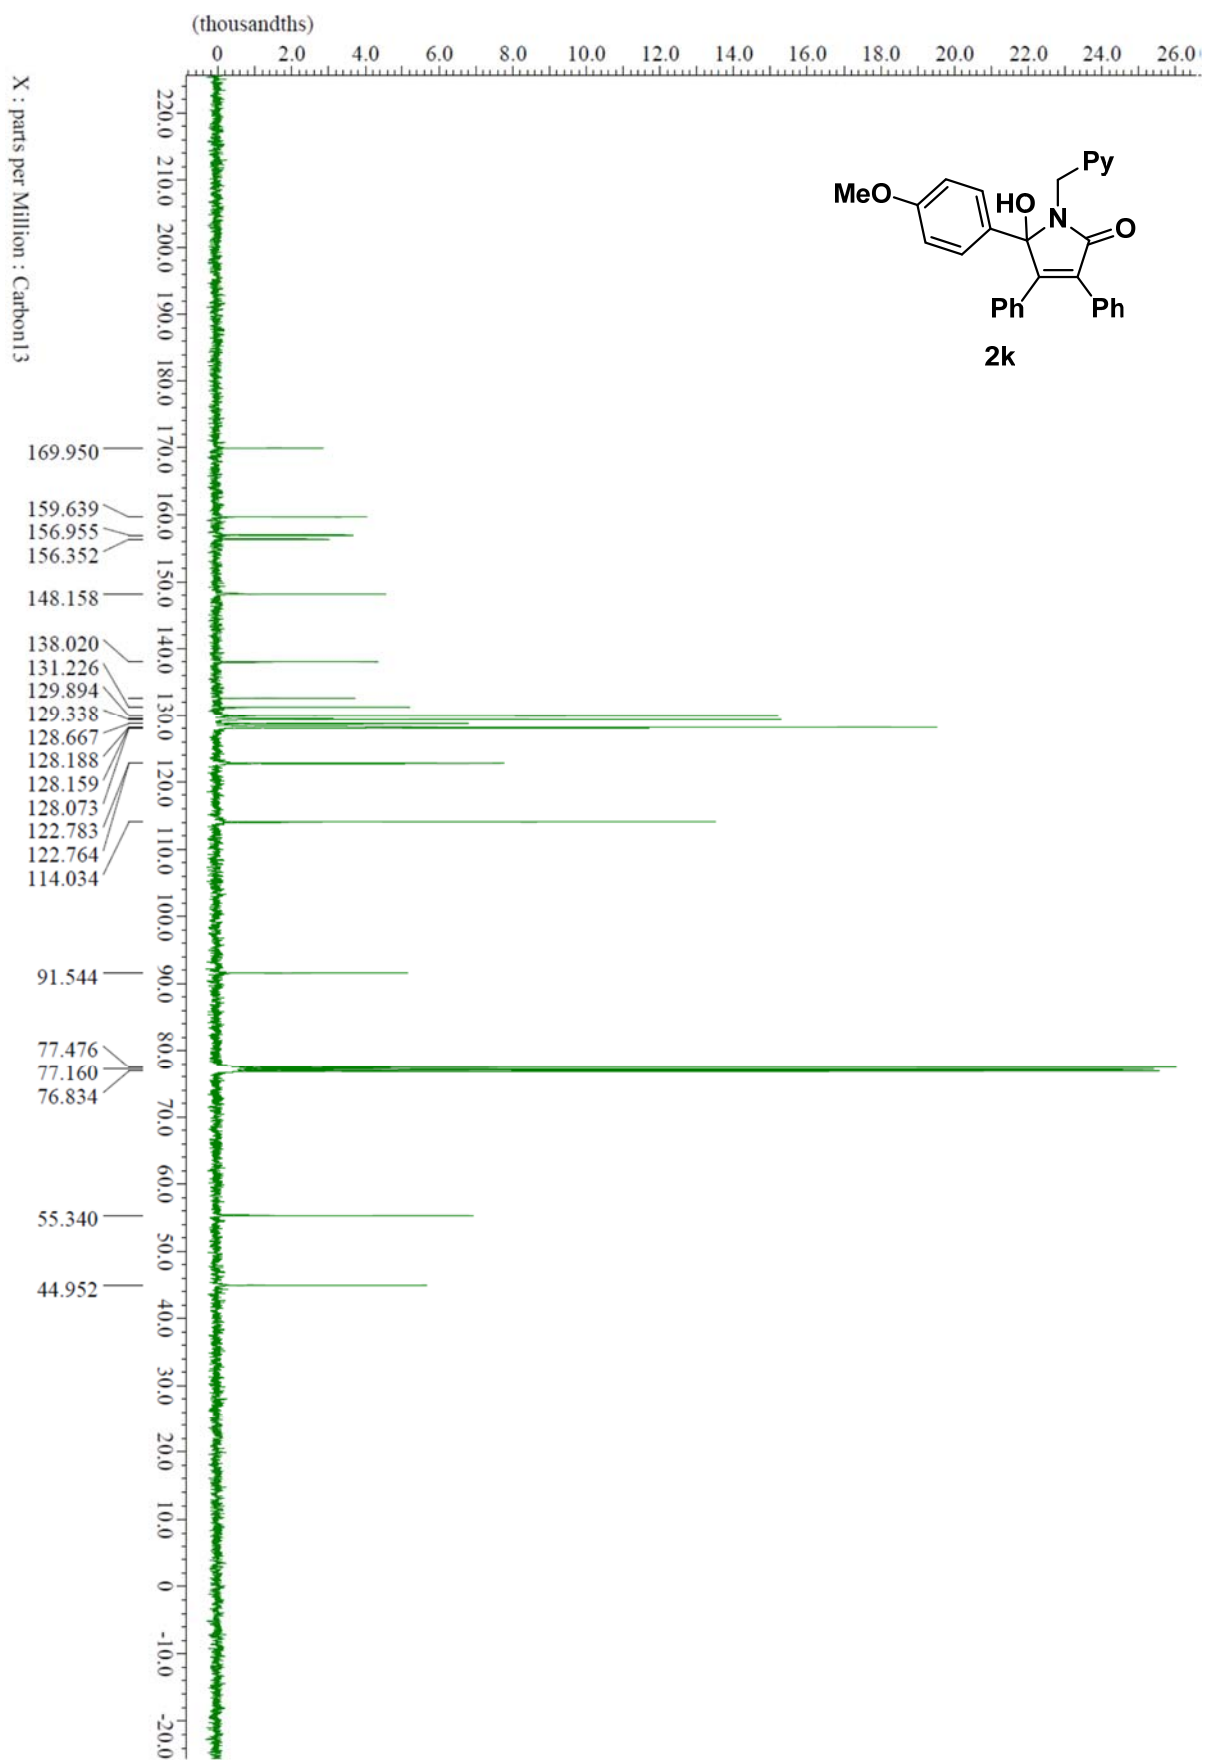

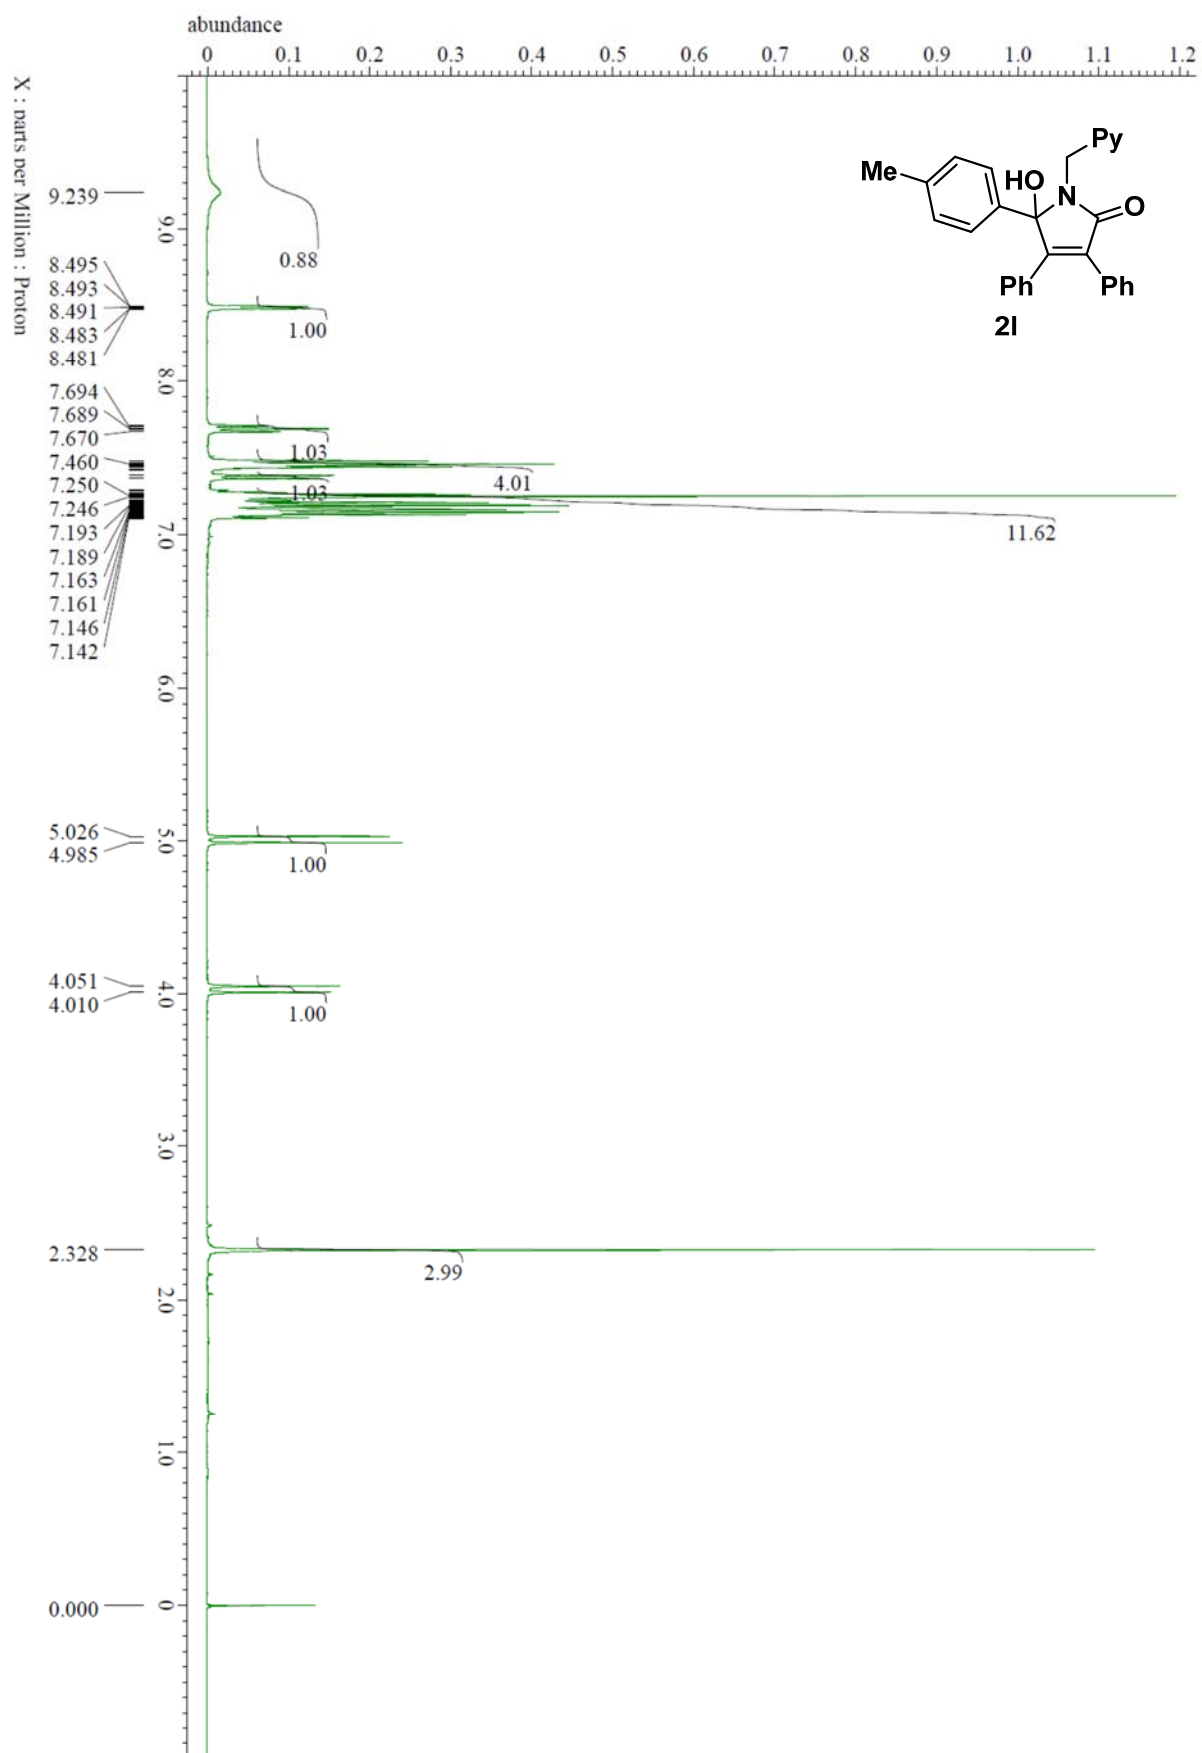



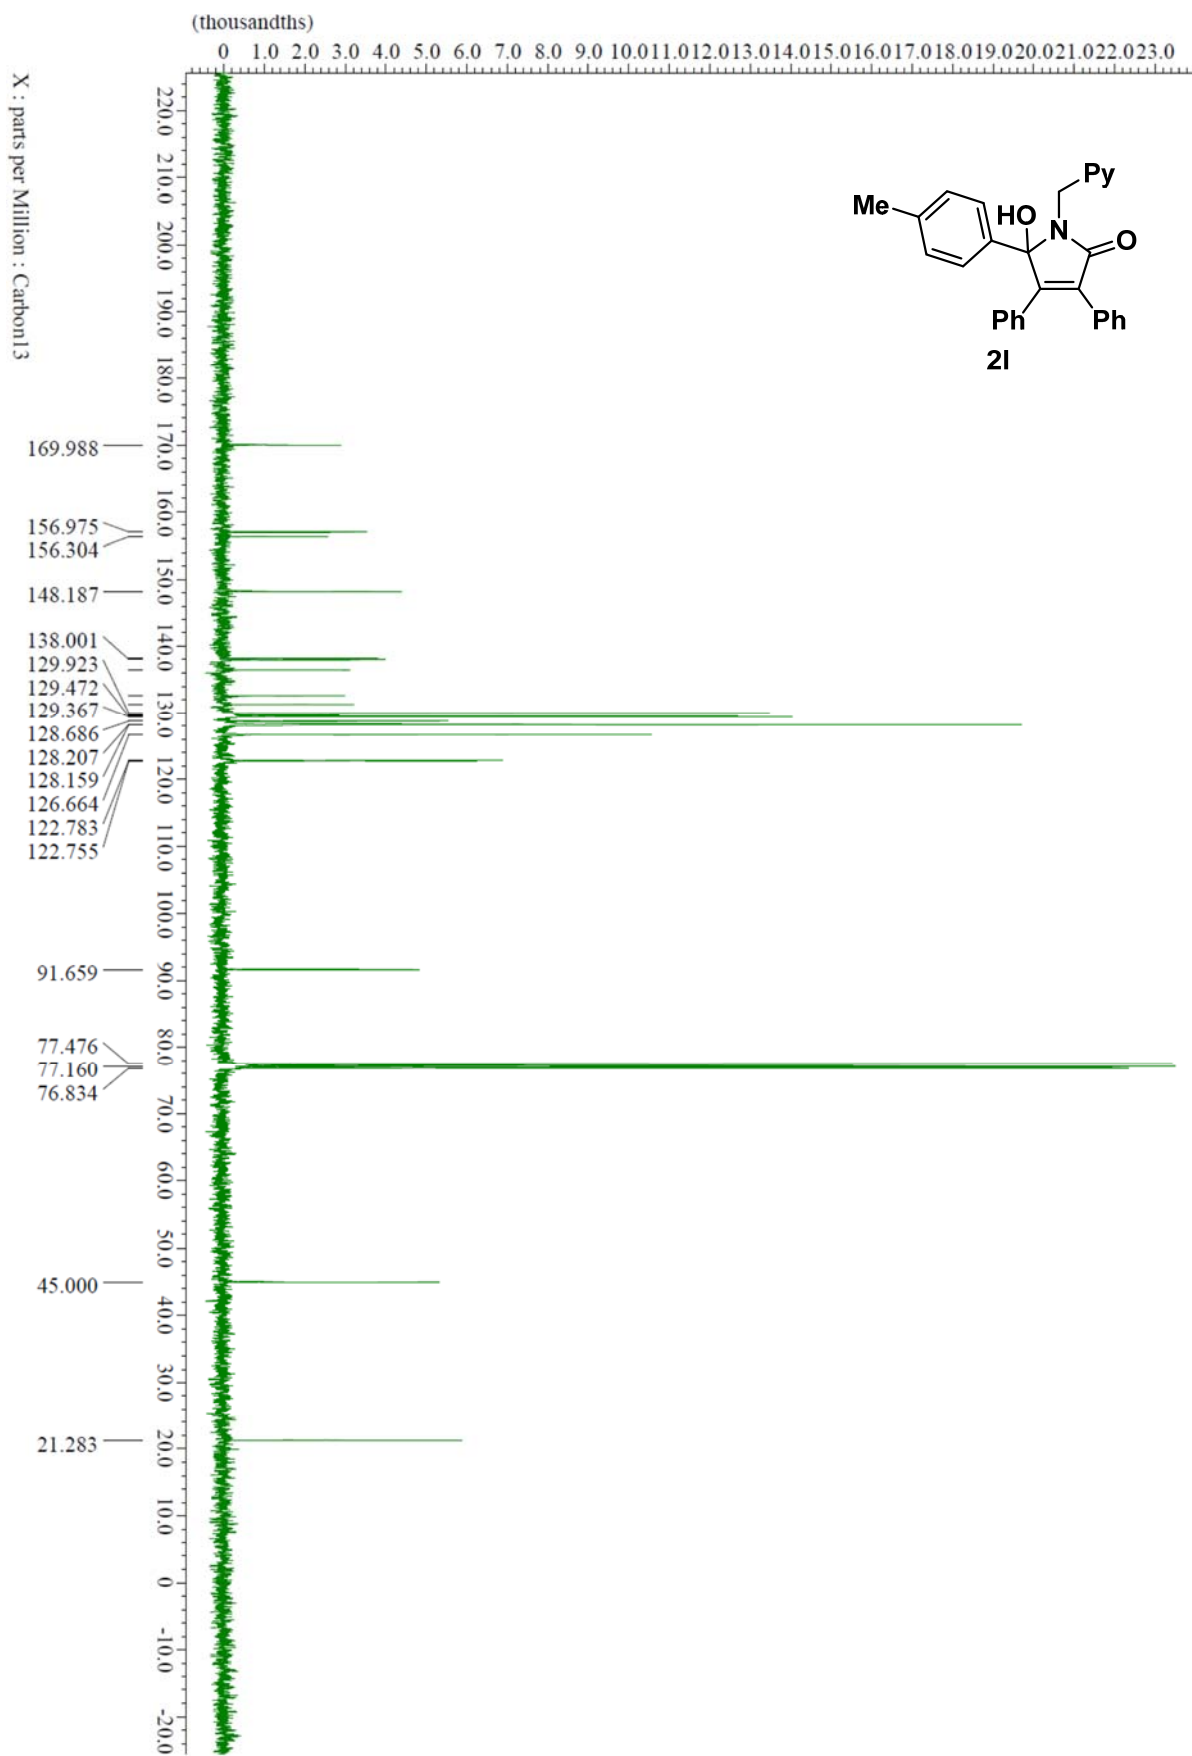

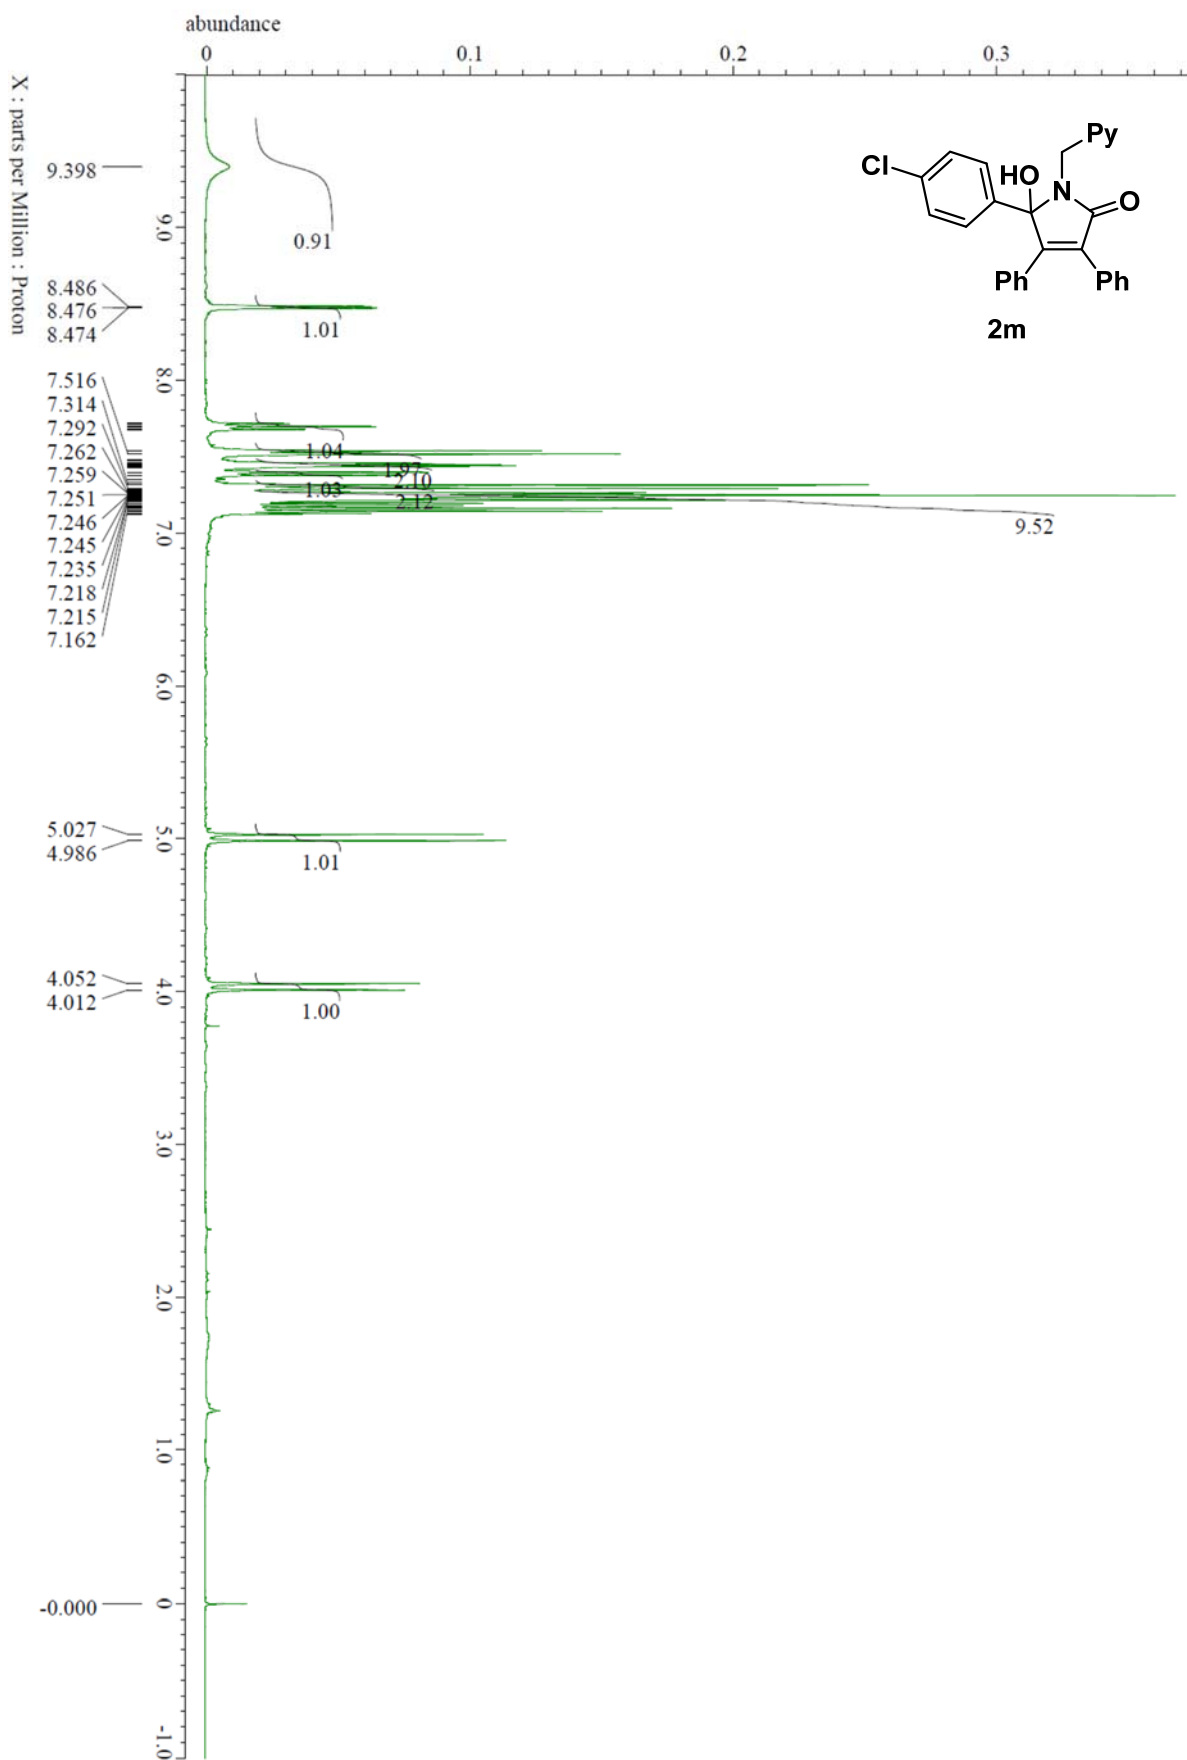

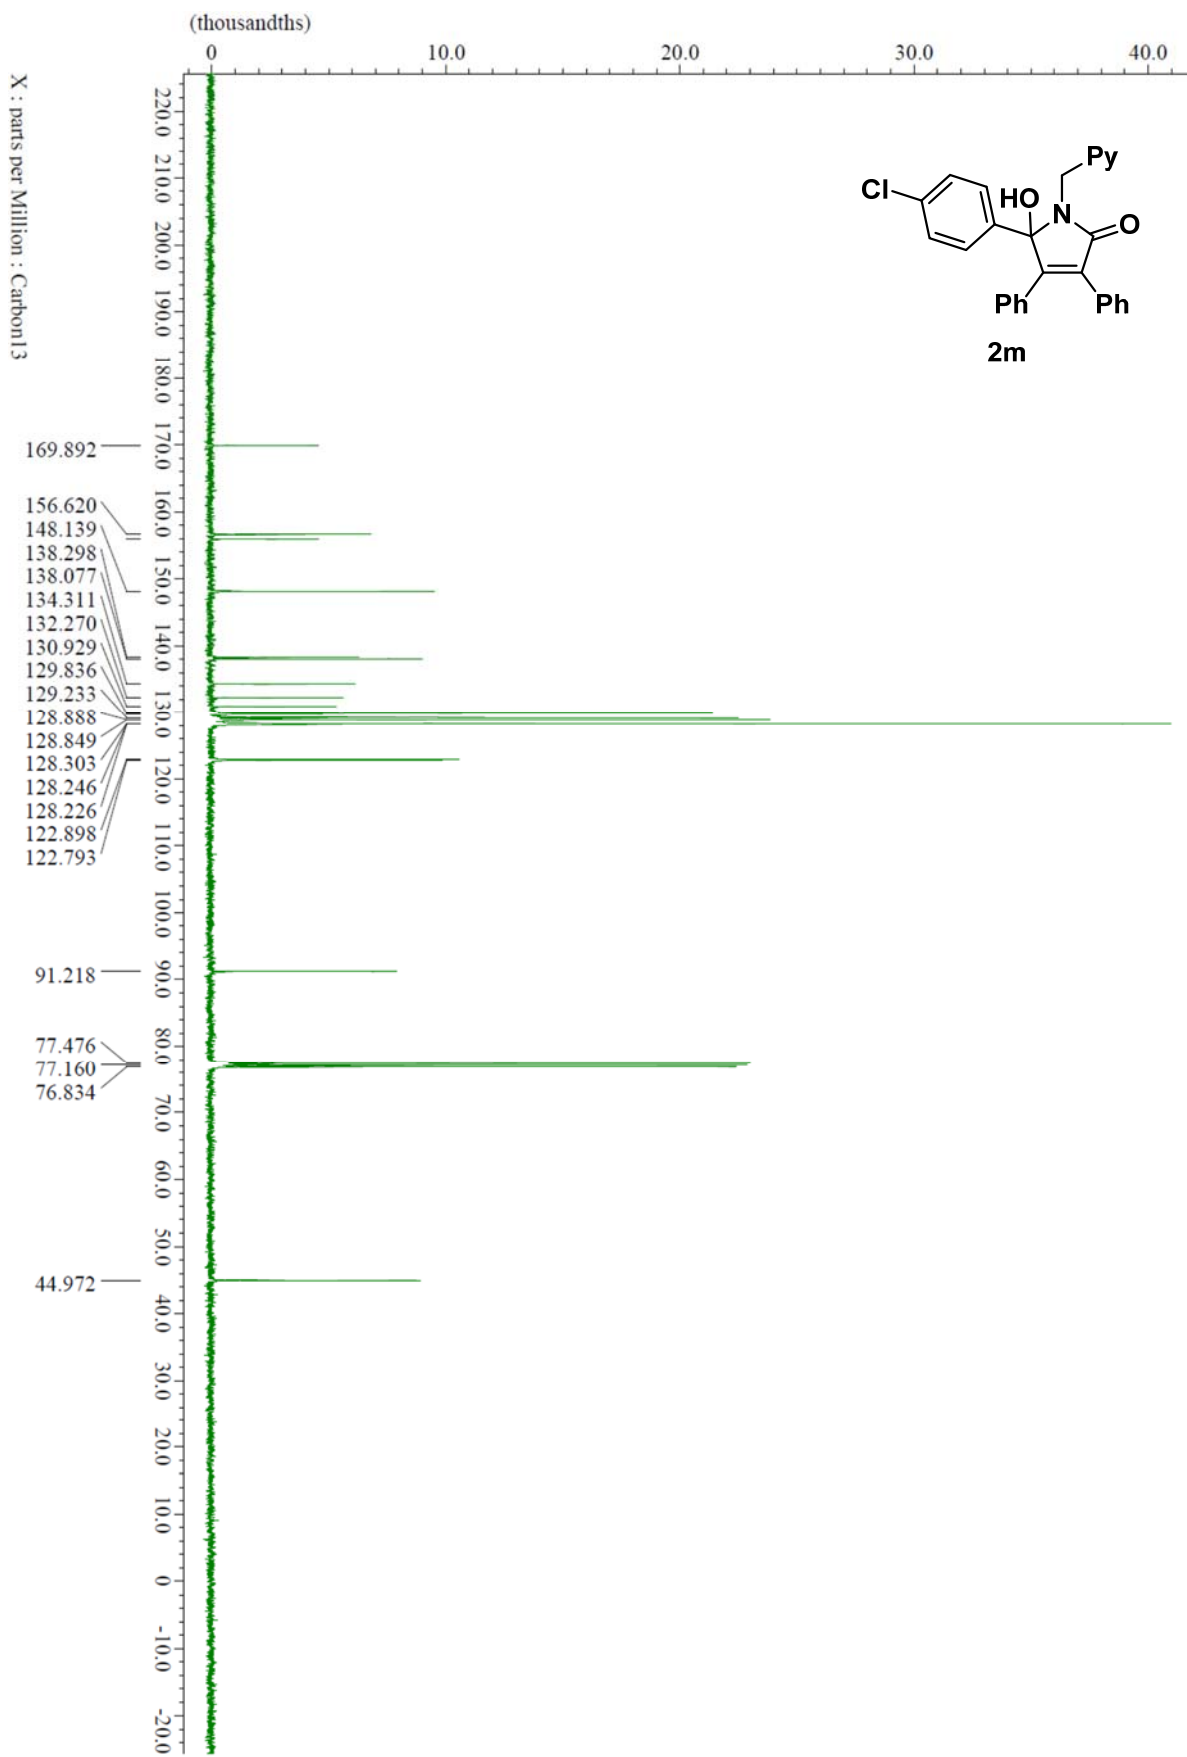

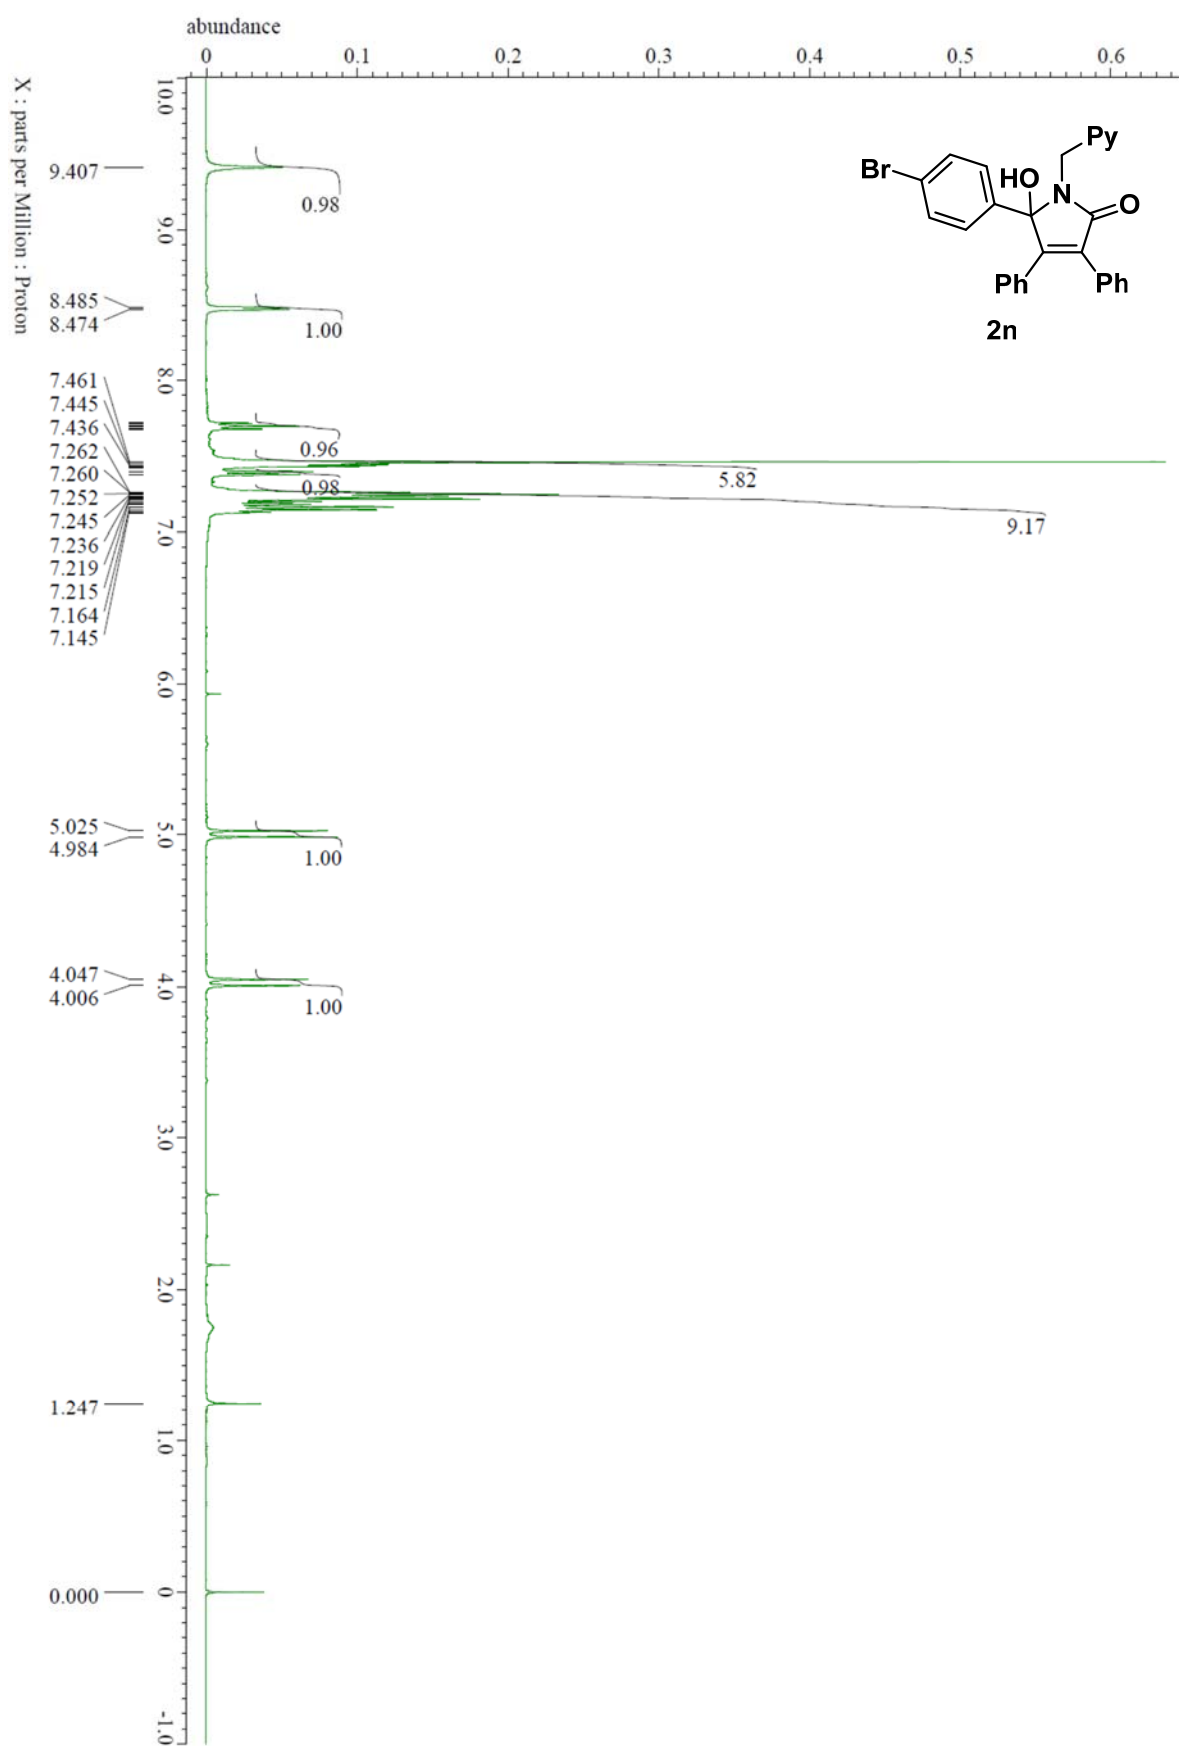

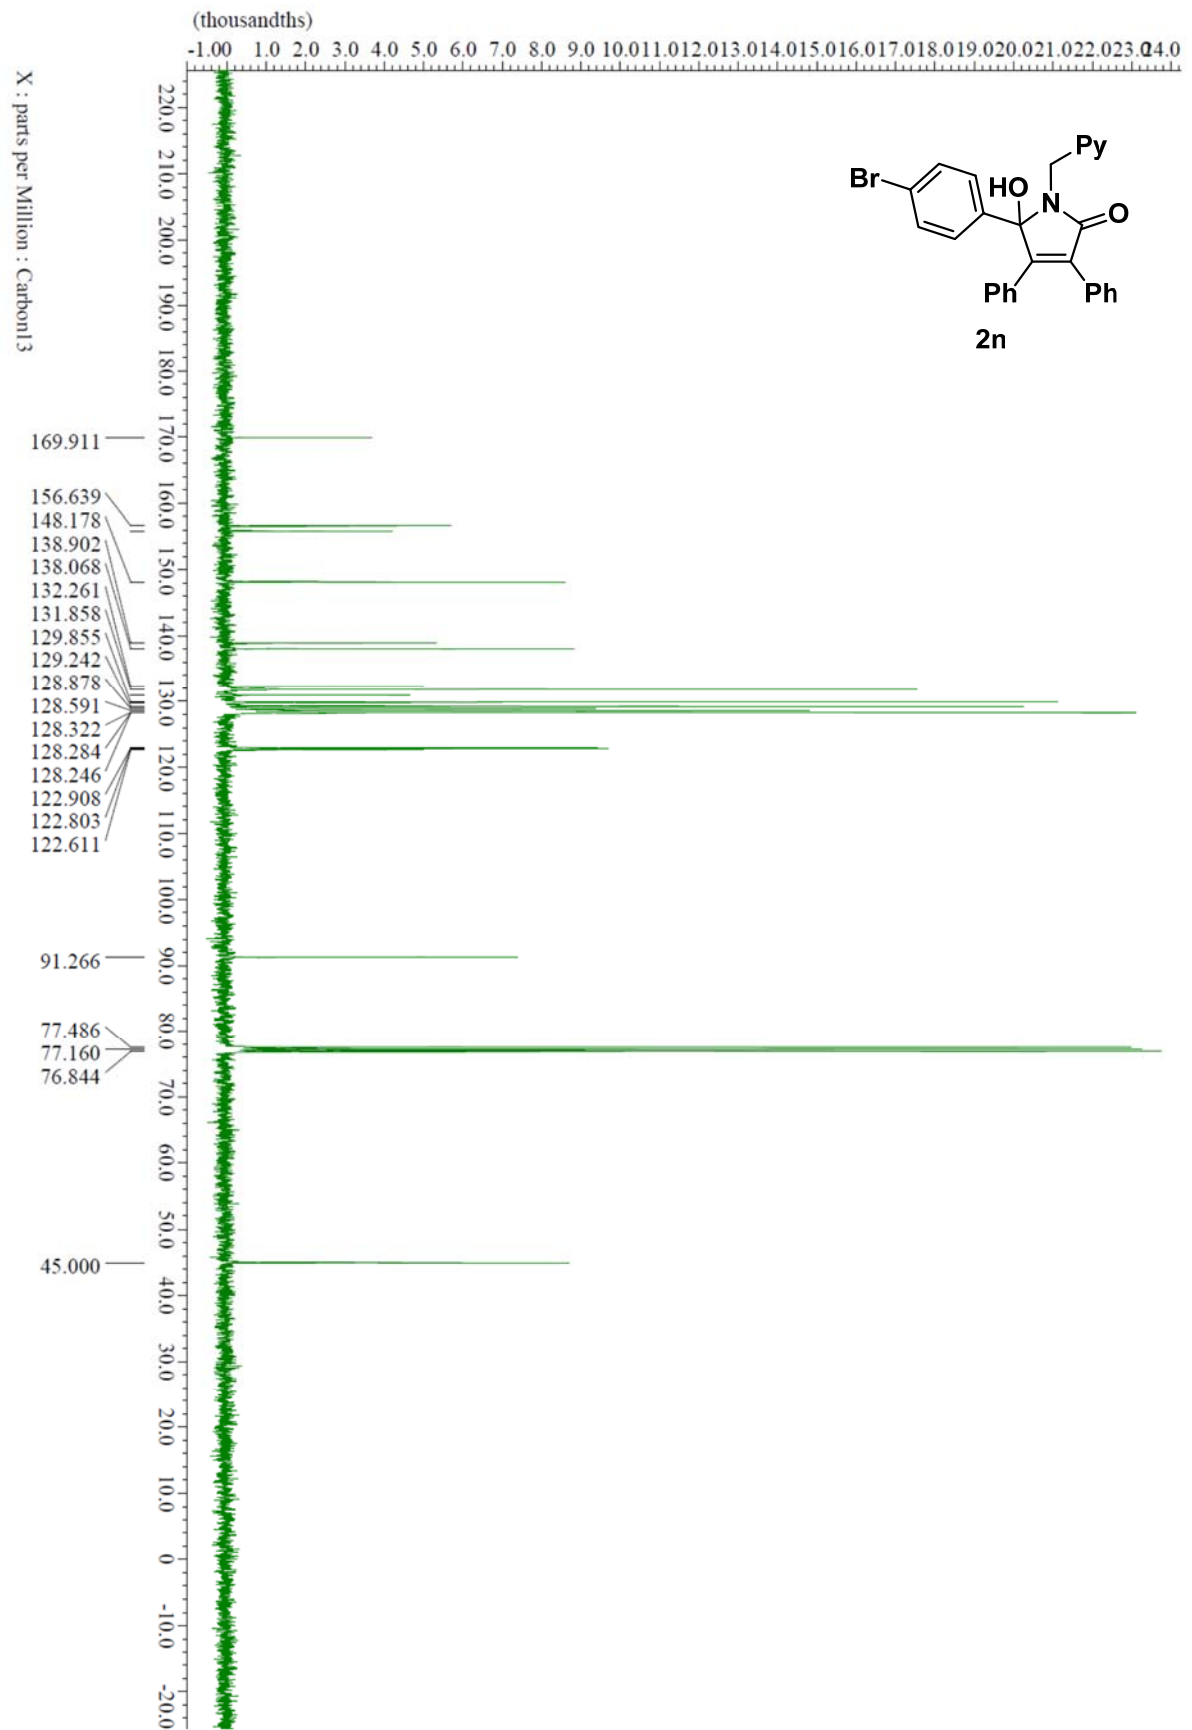

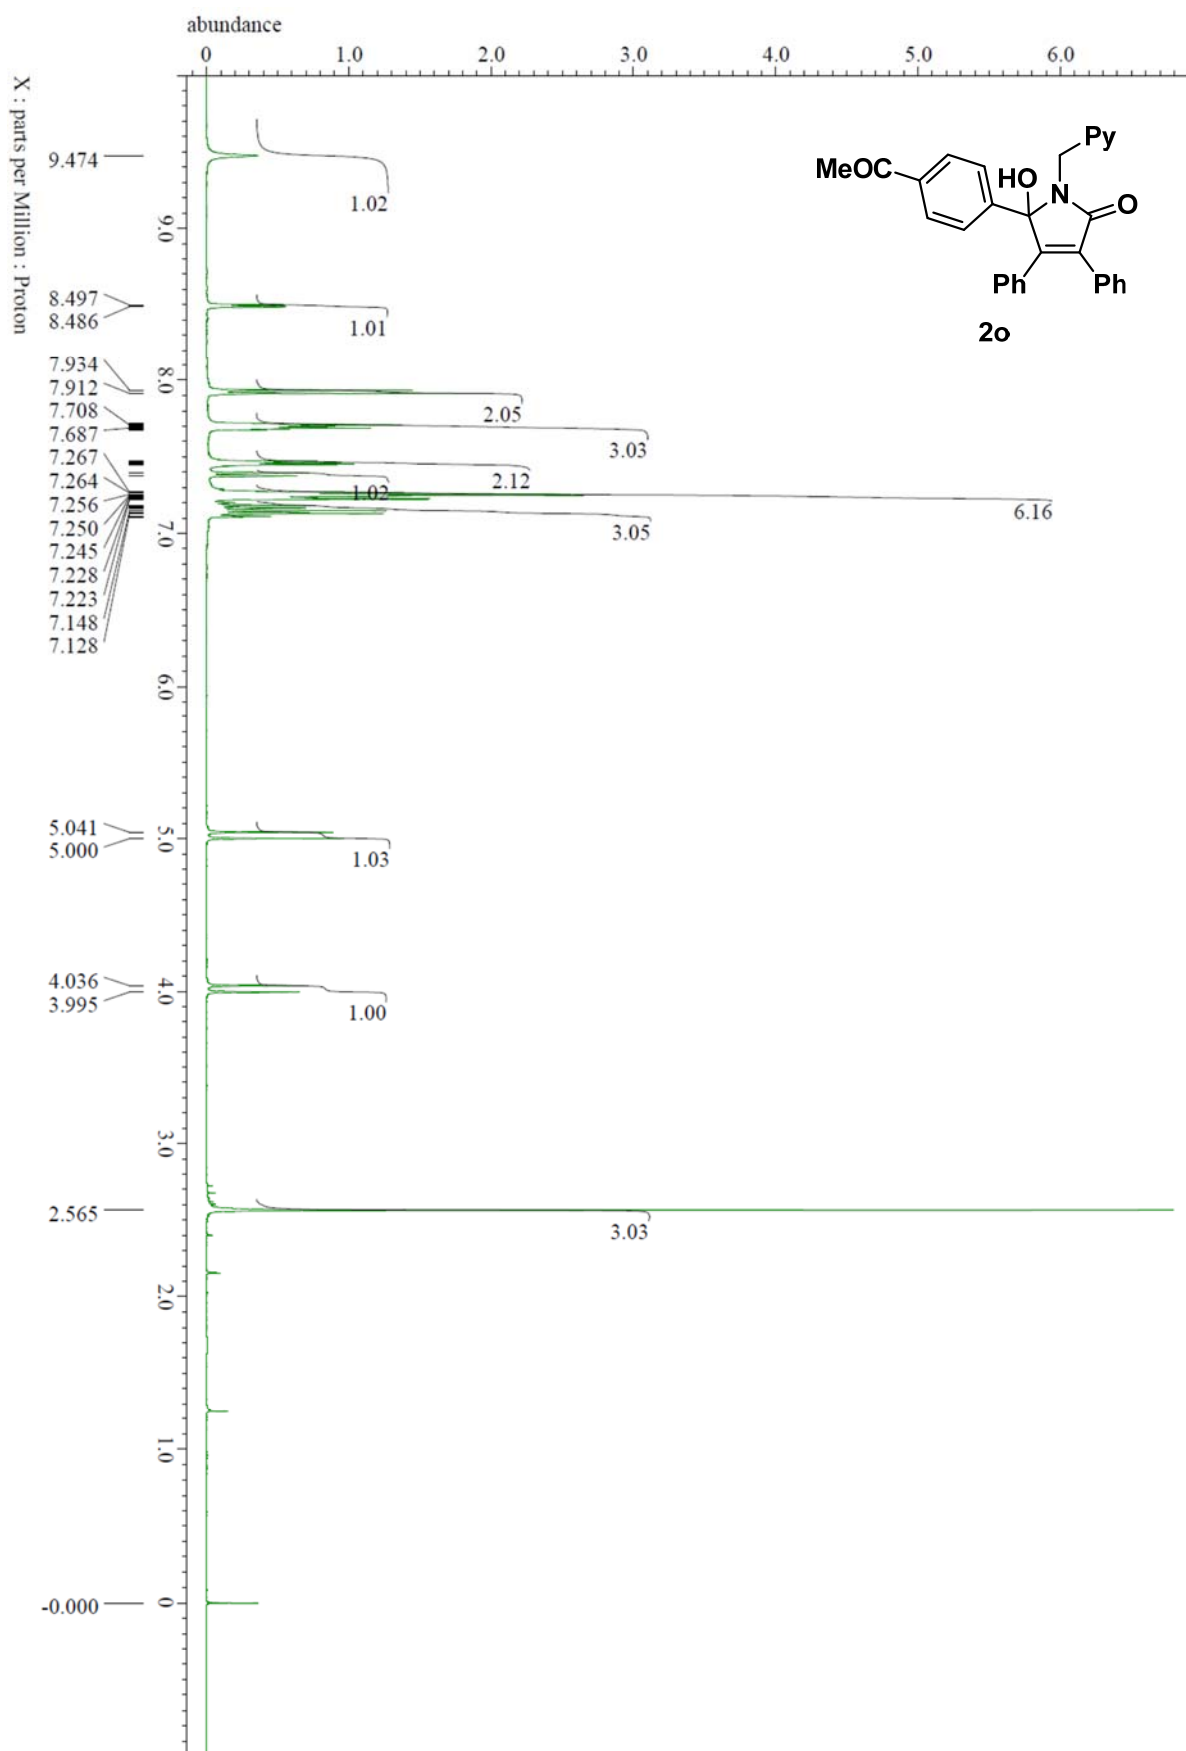

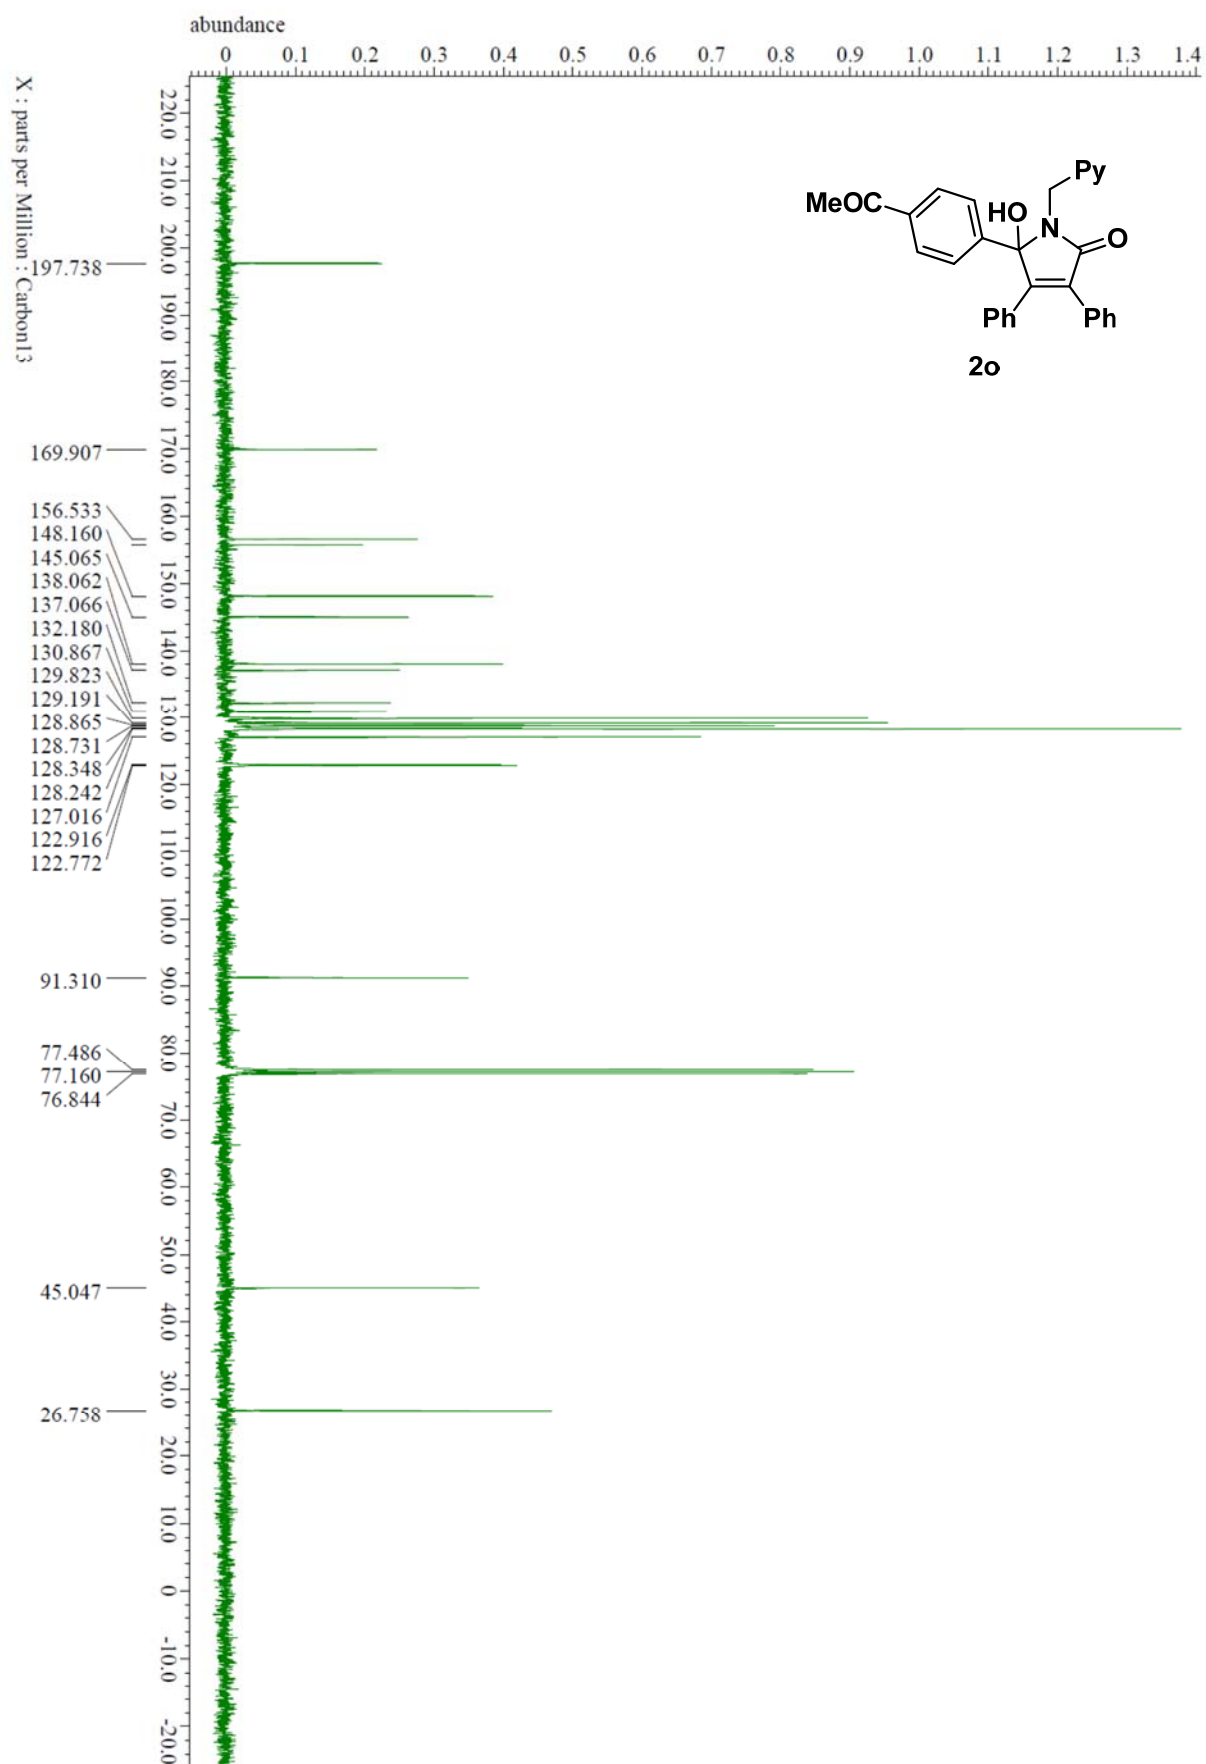

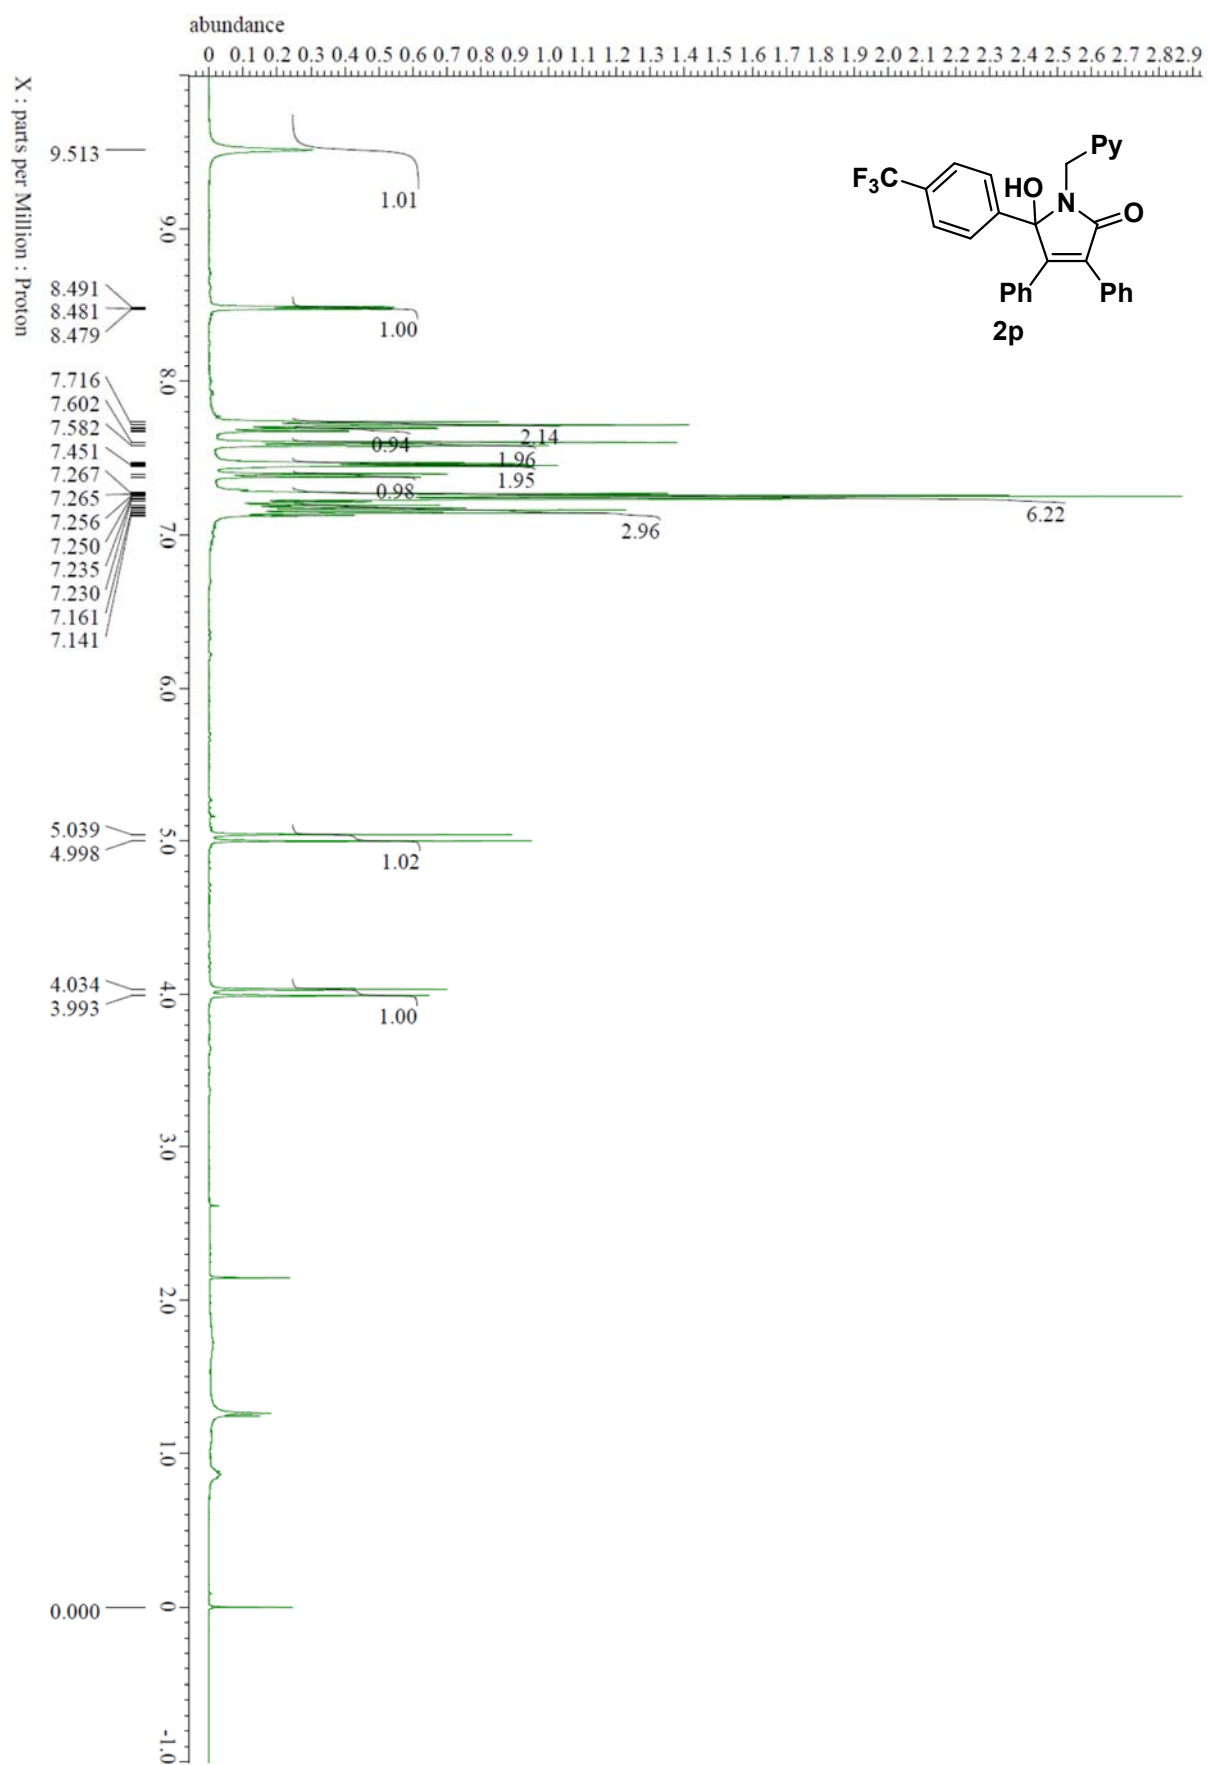



single pulse decoupled gated NOE

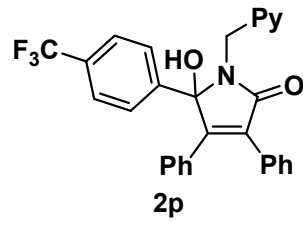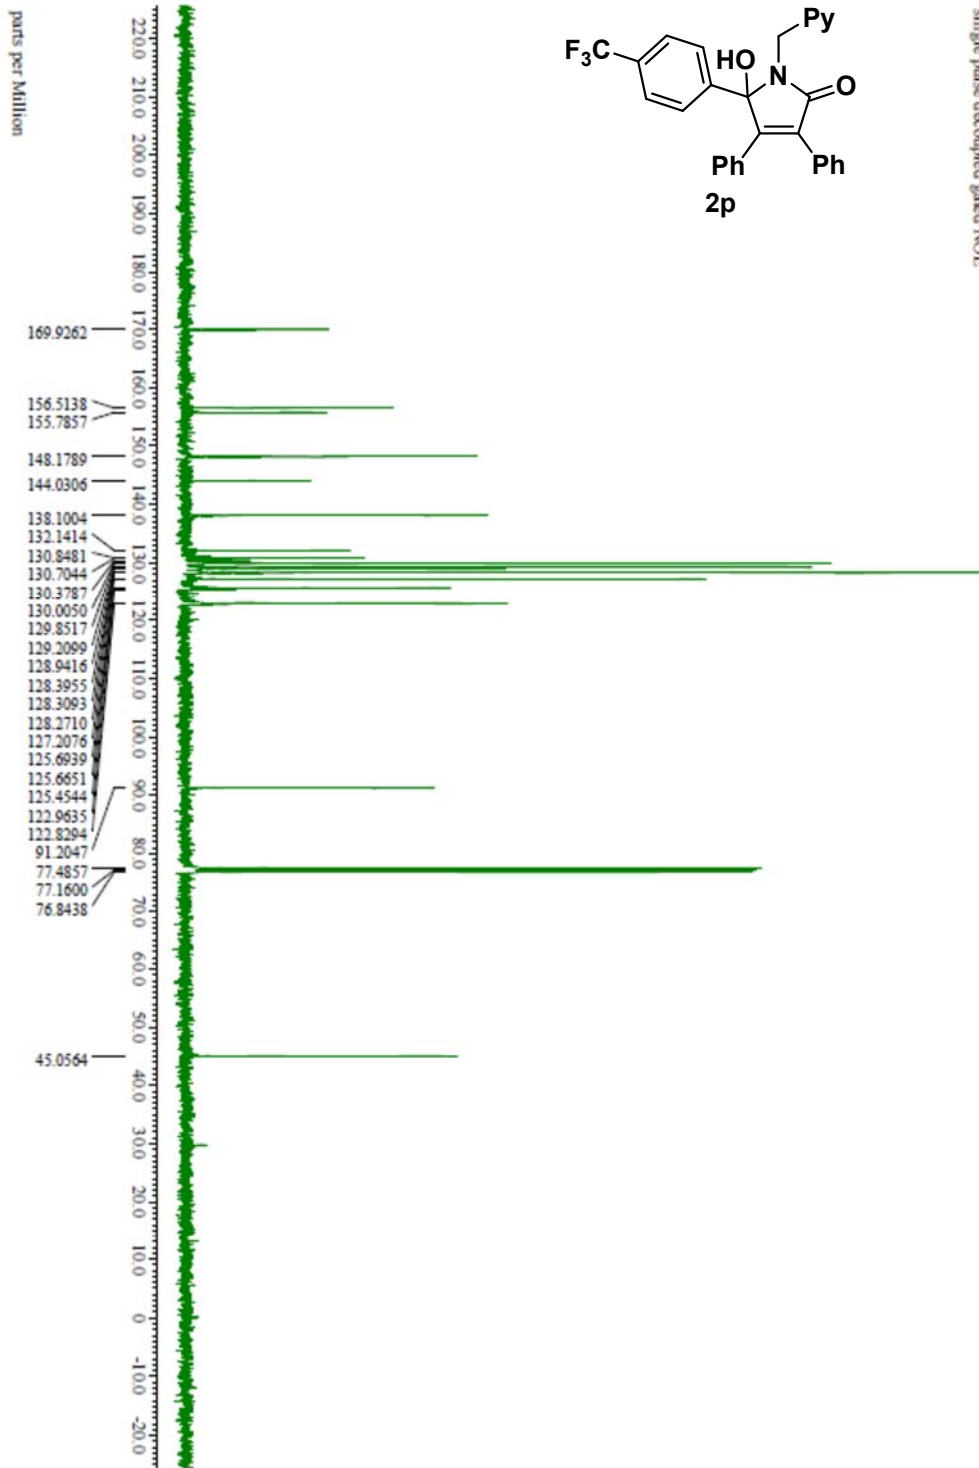

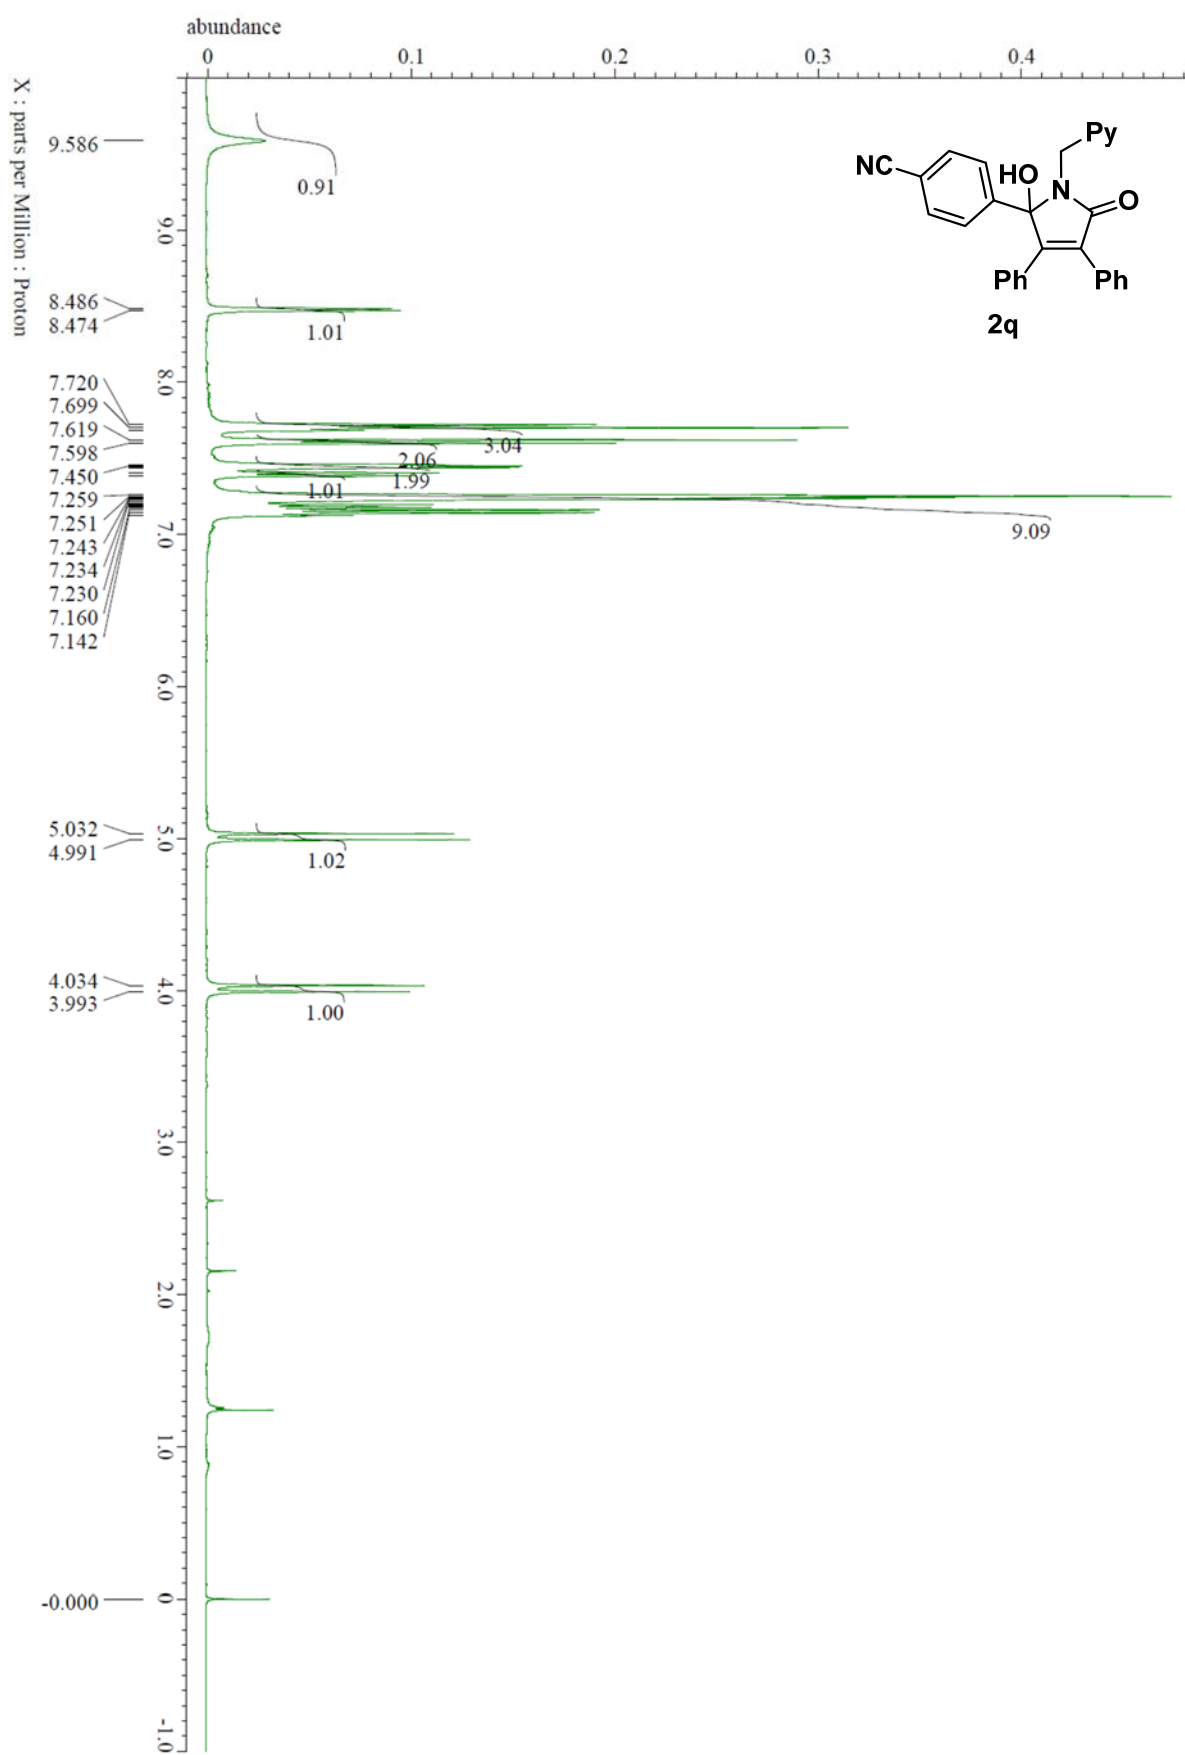

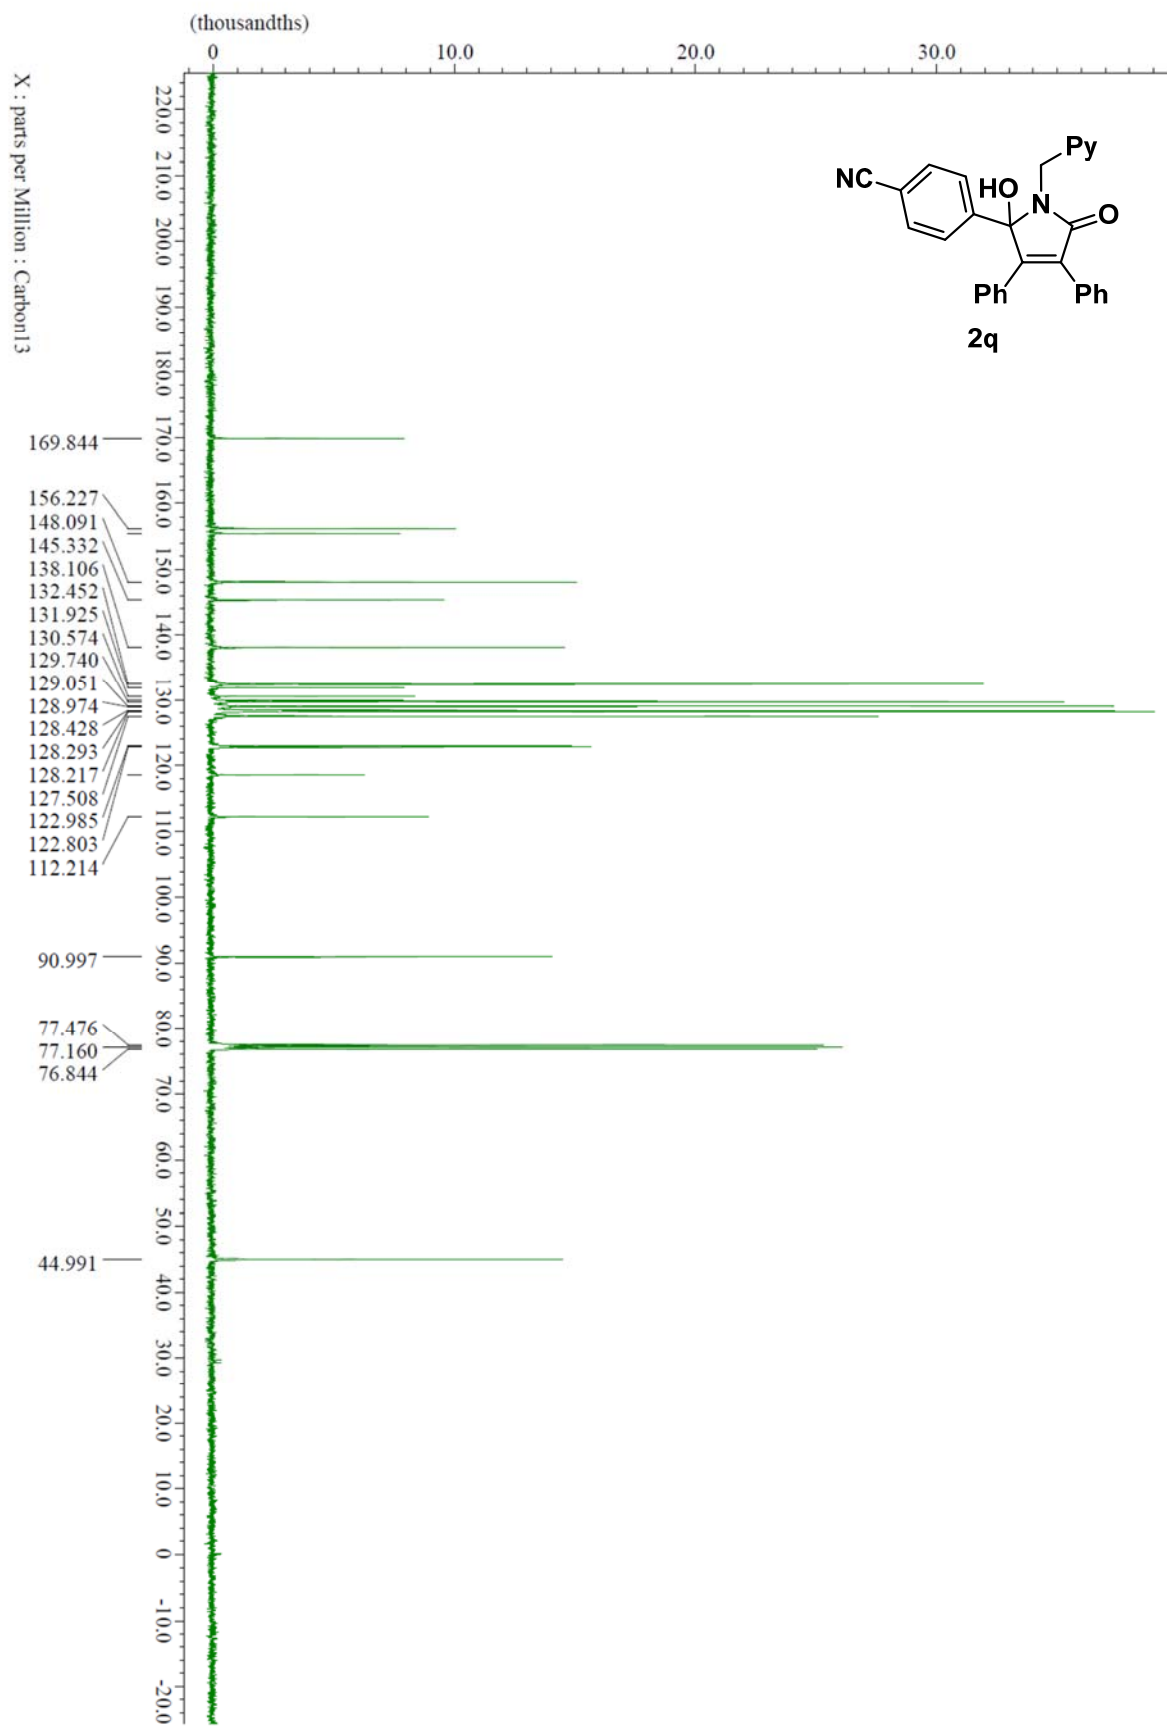

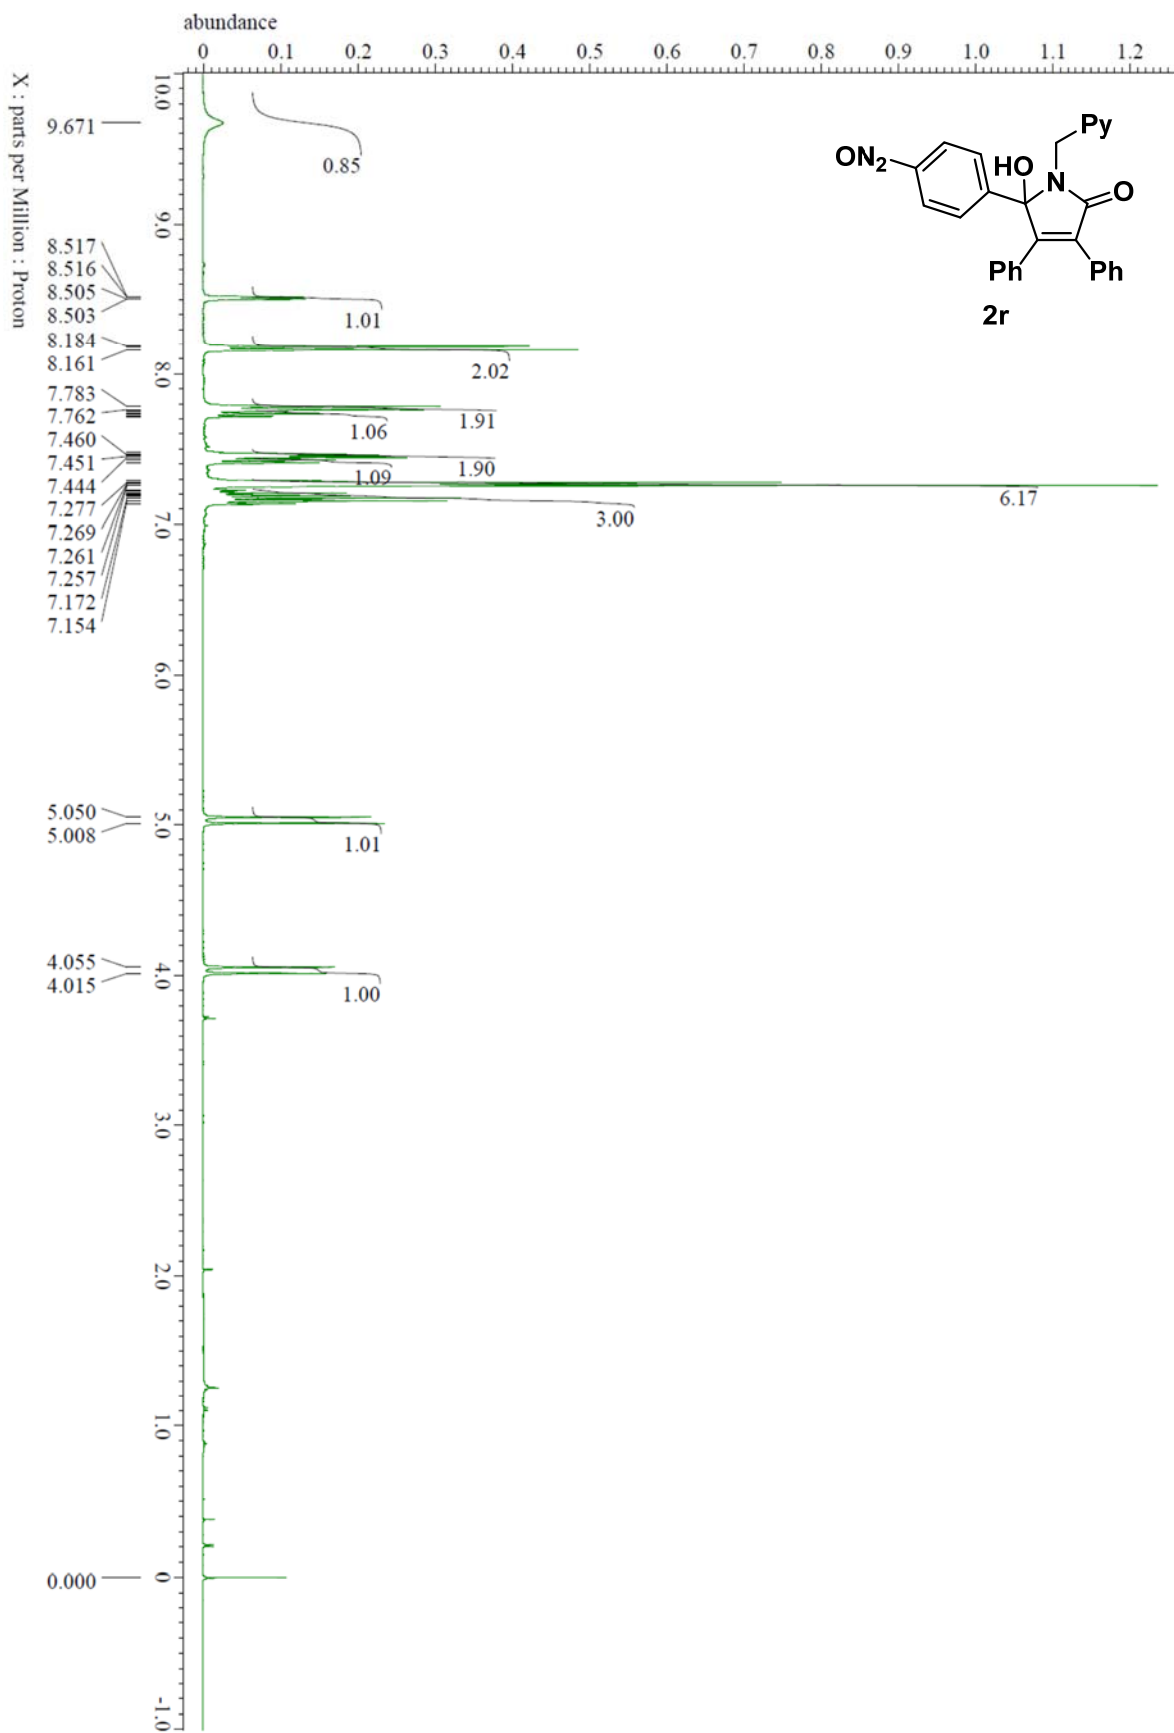

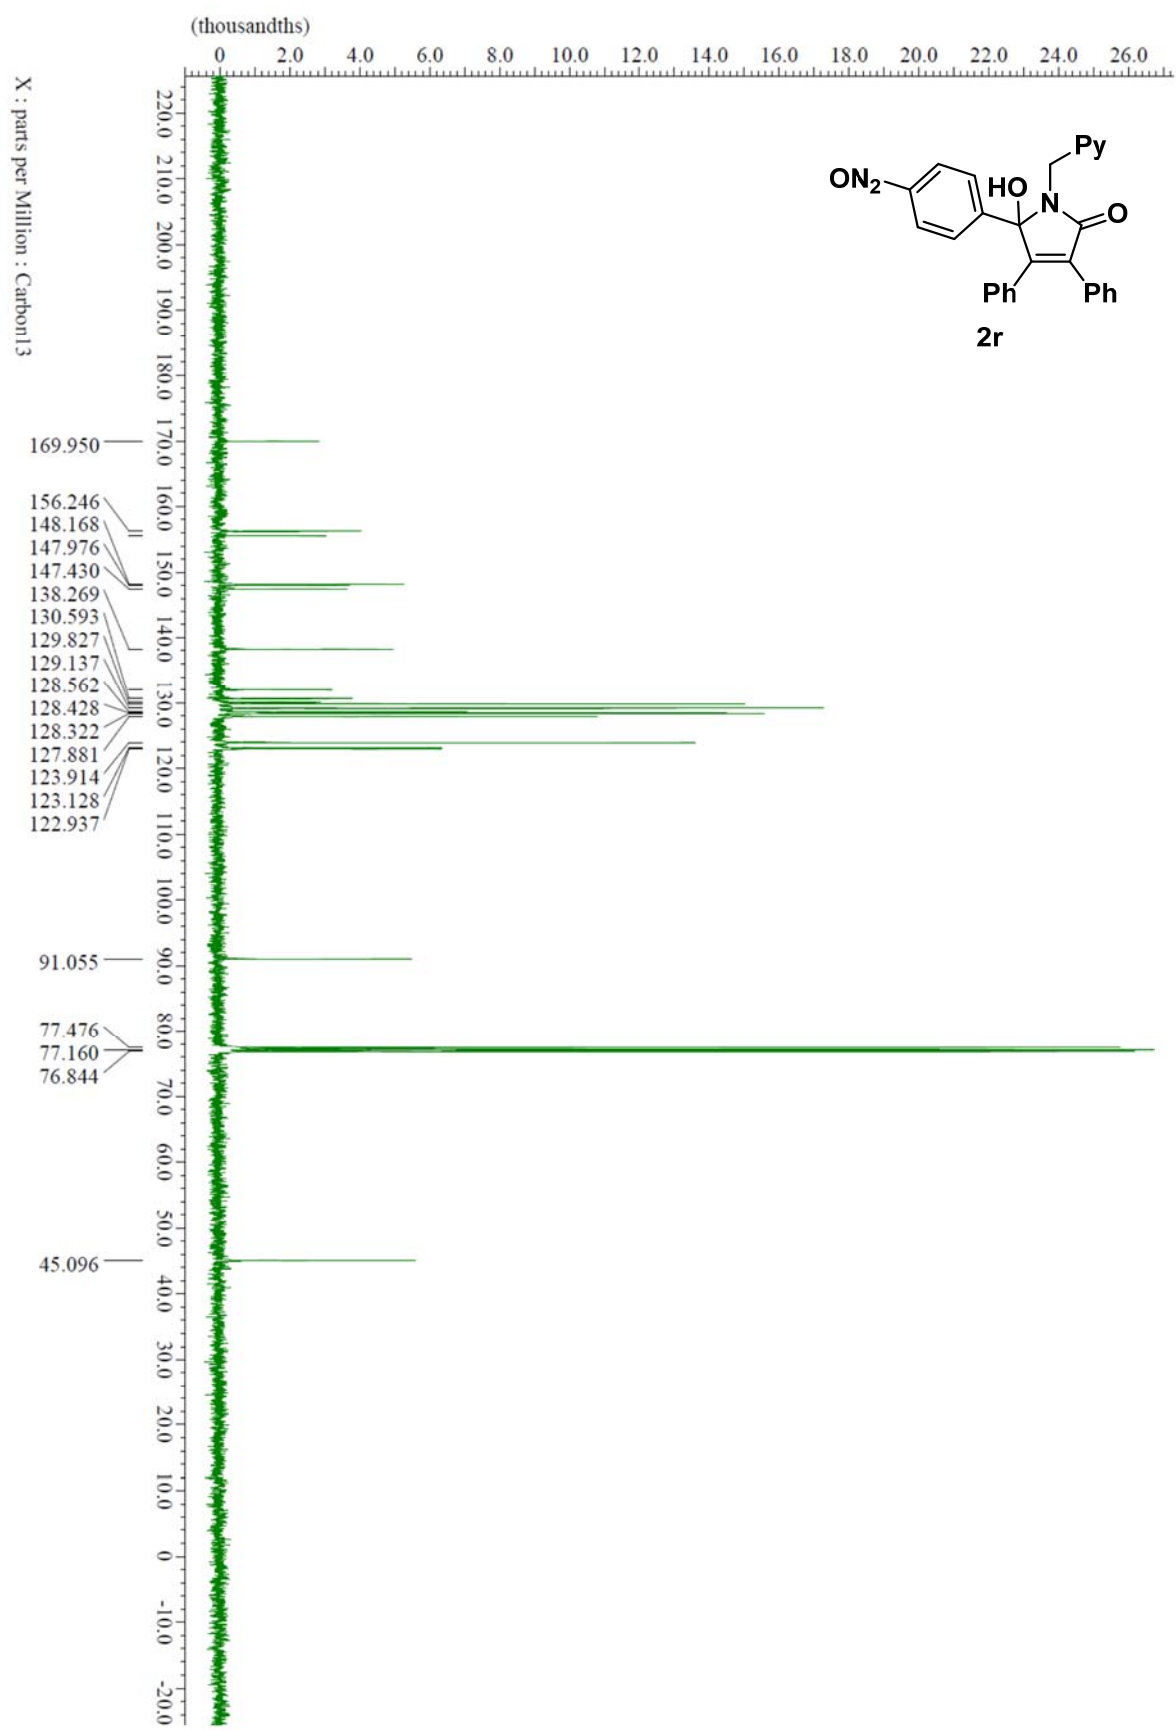

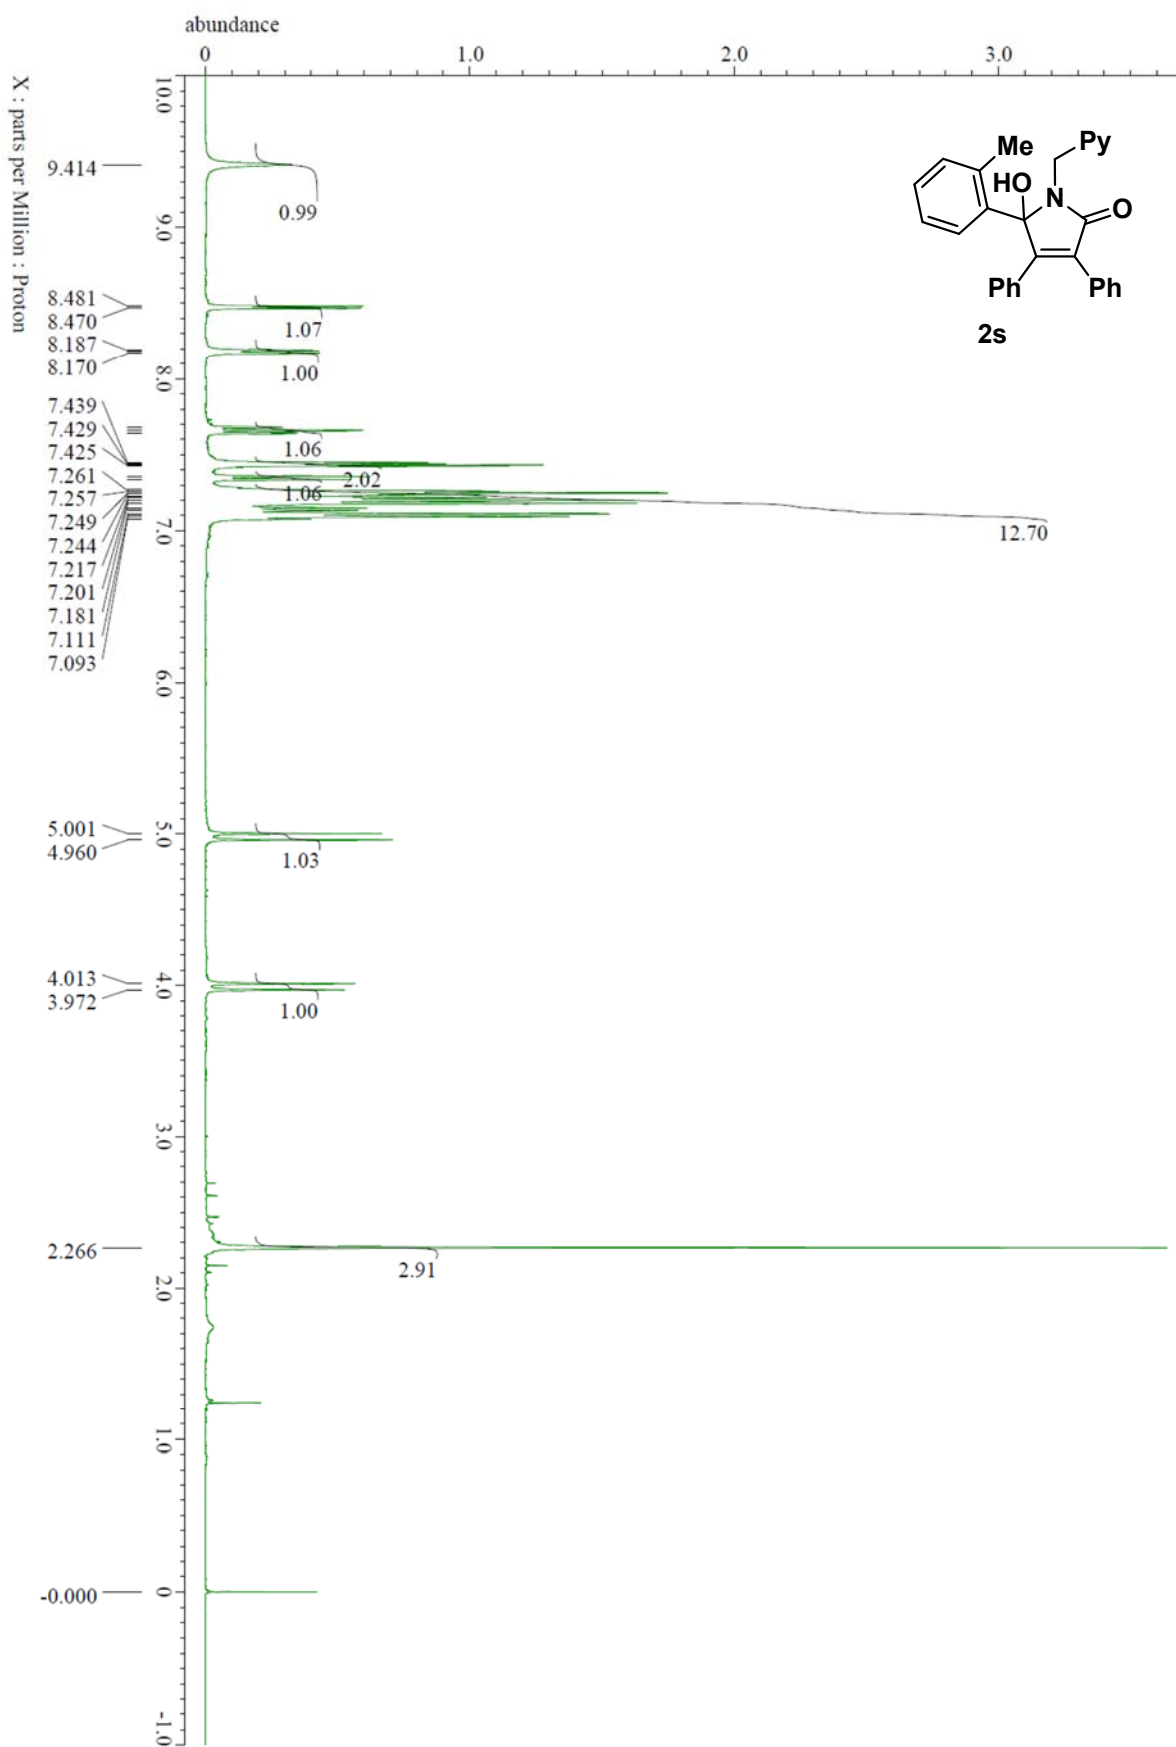

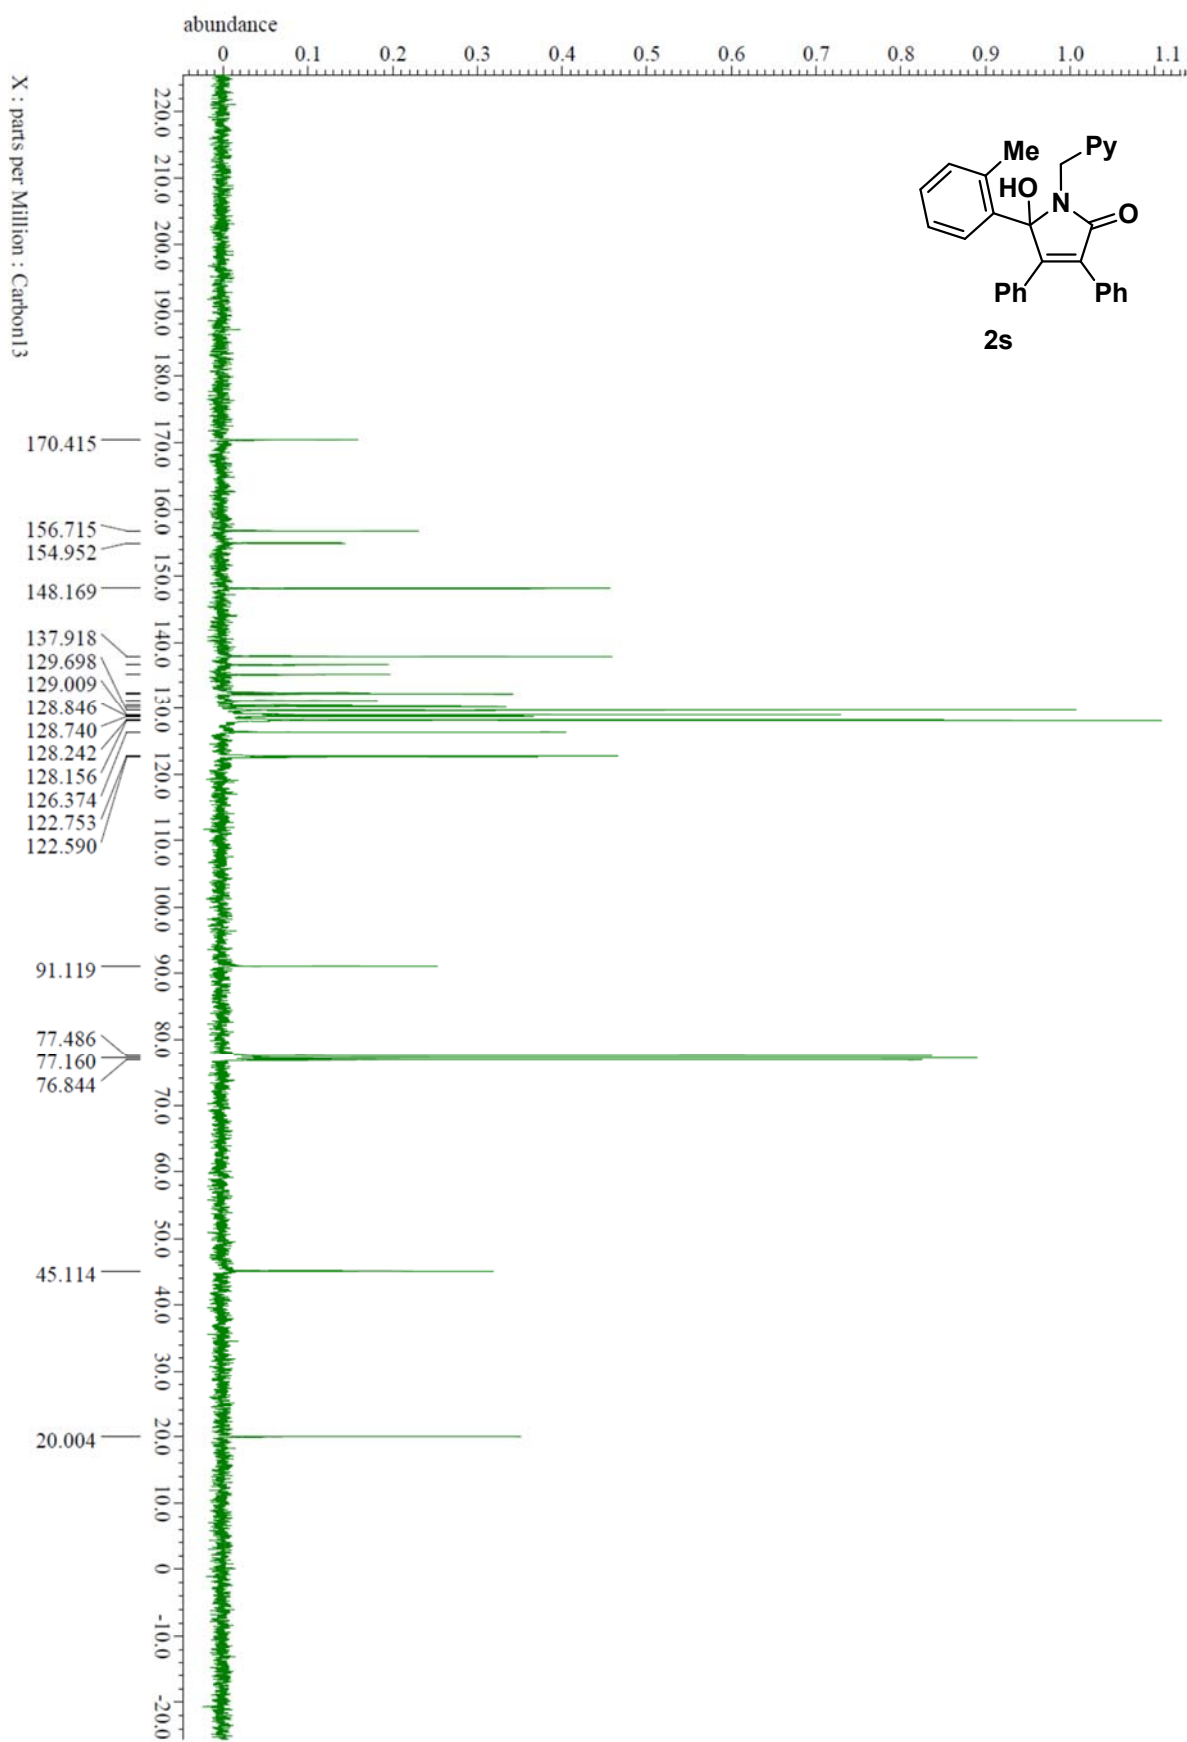

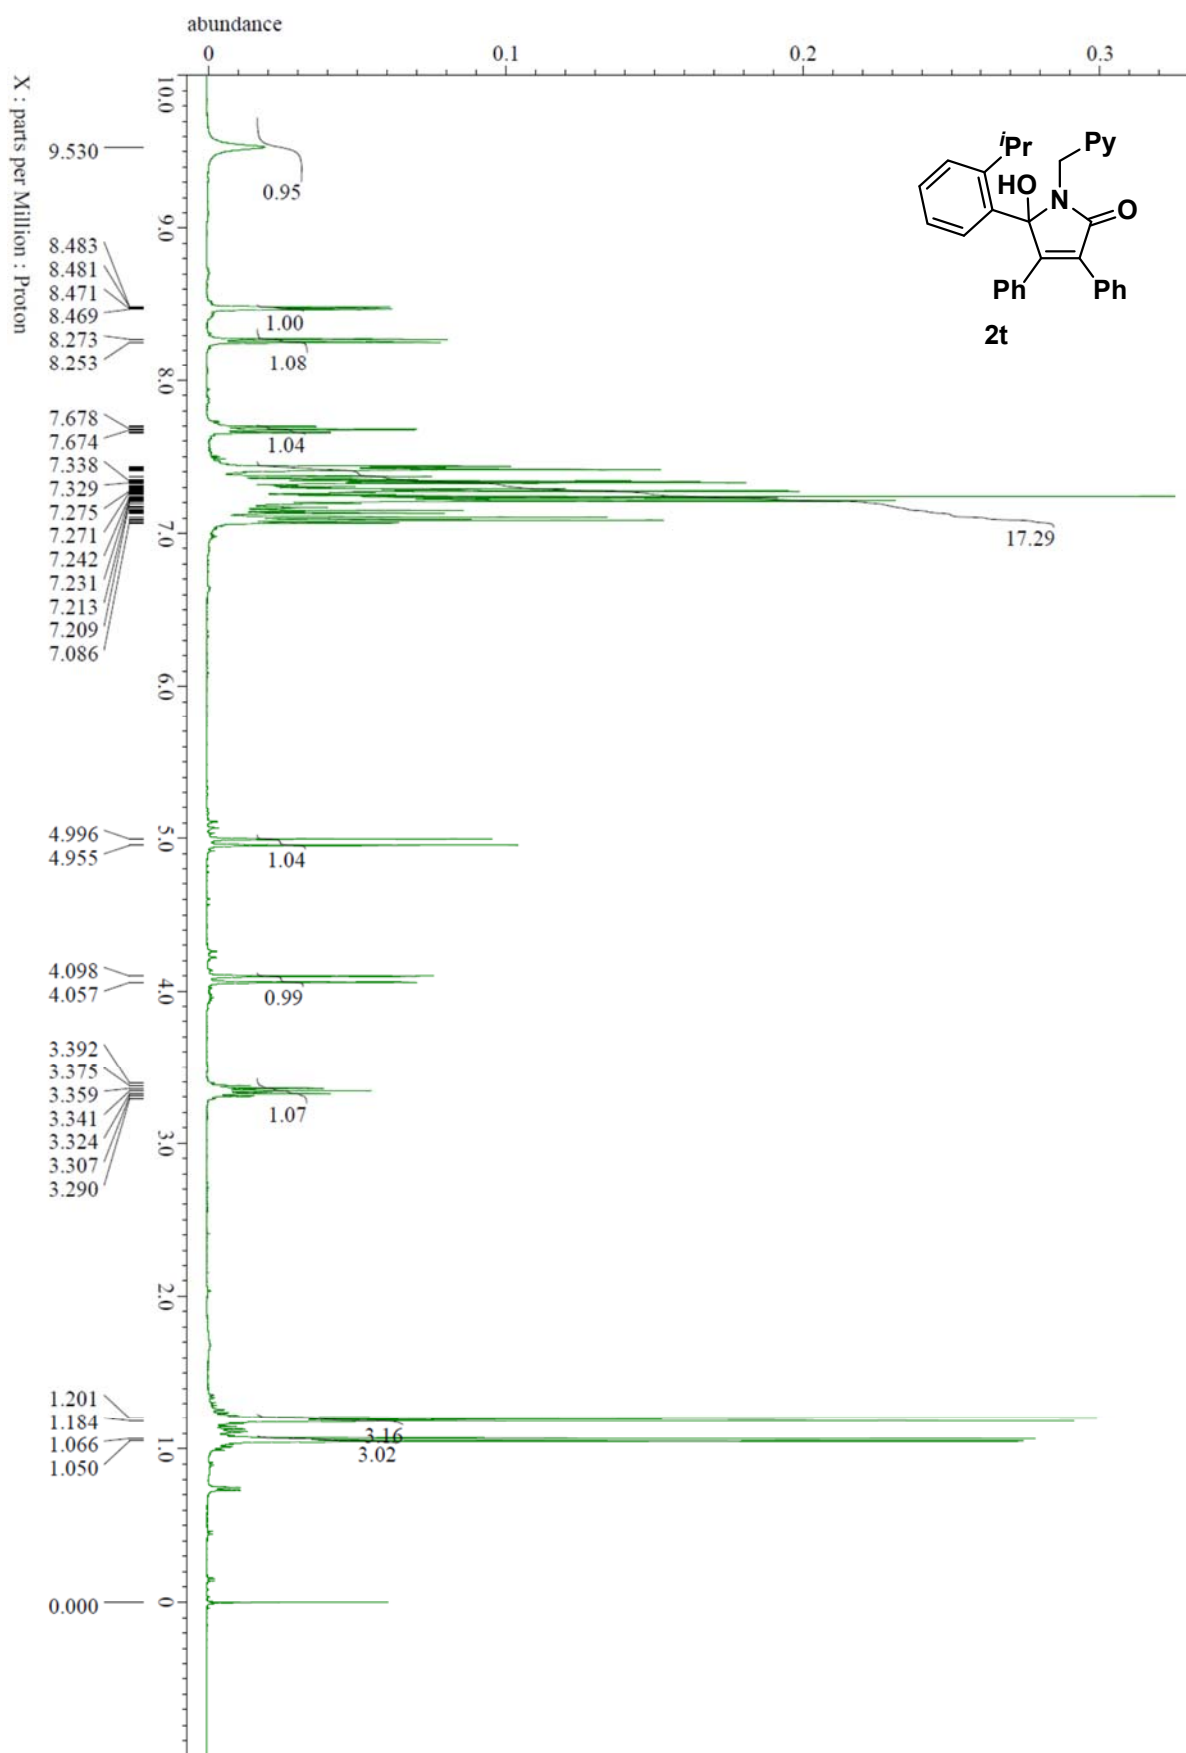



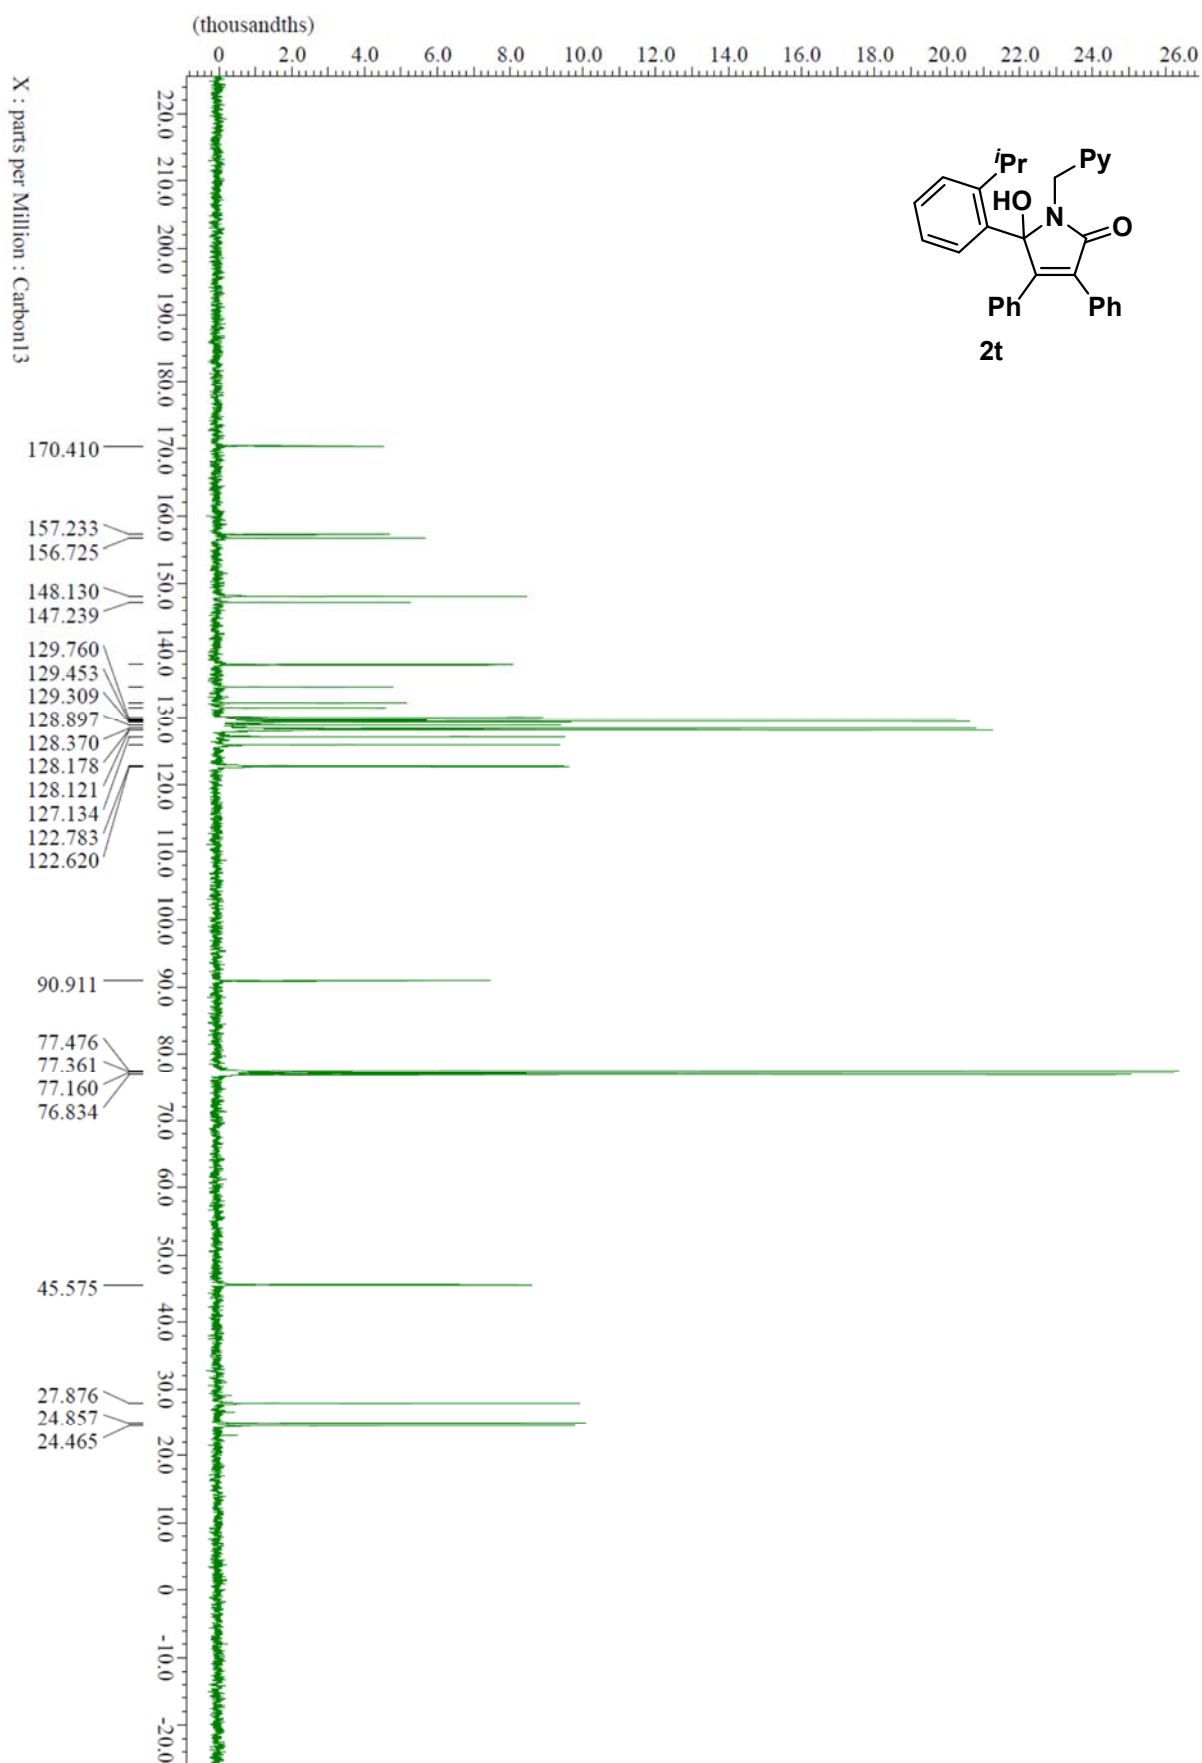

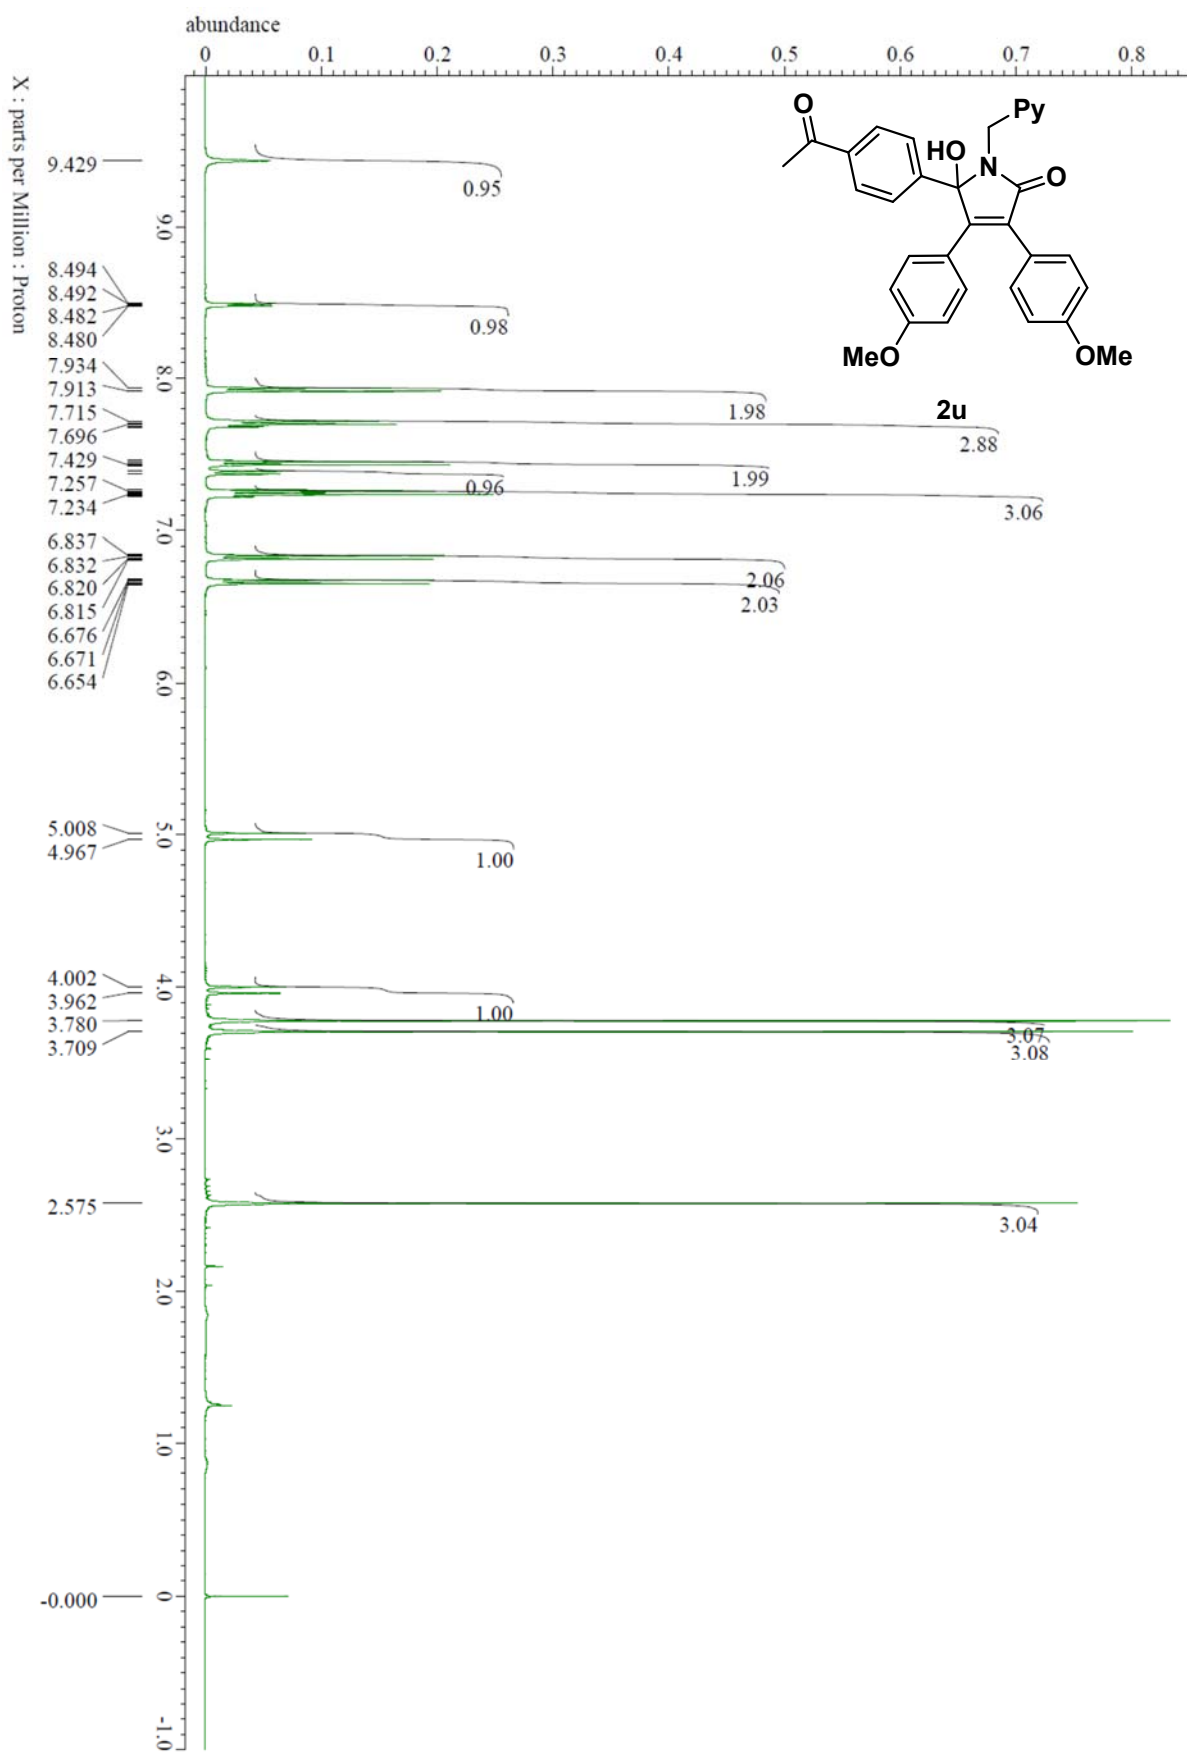

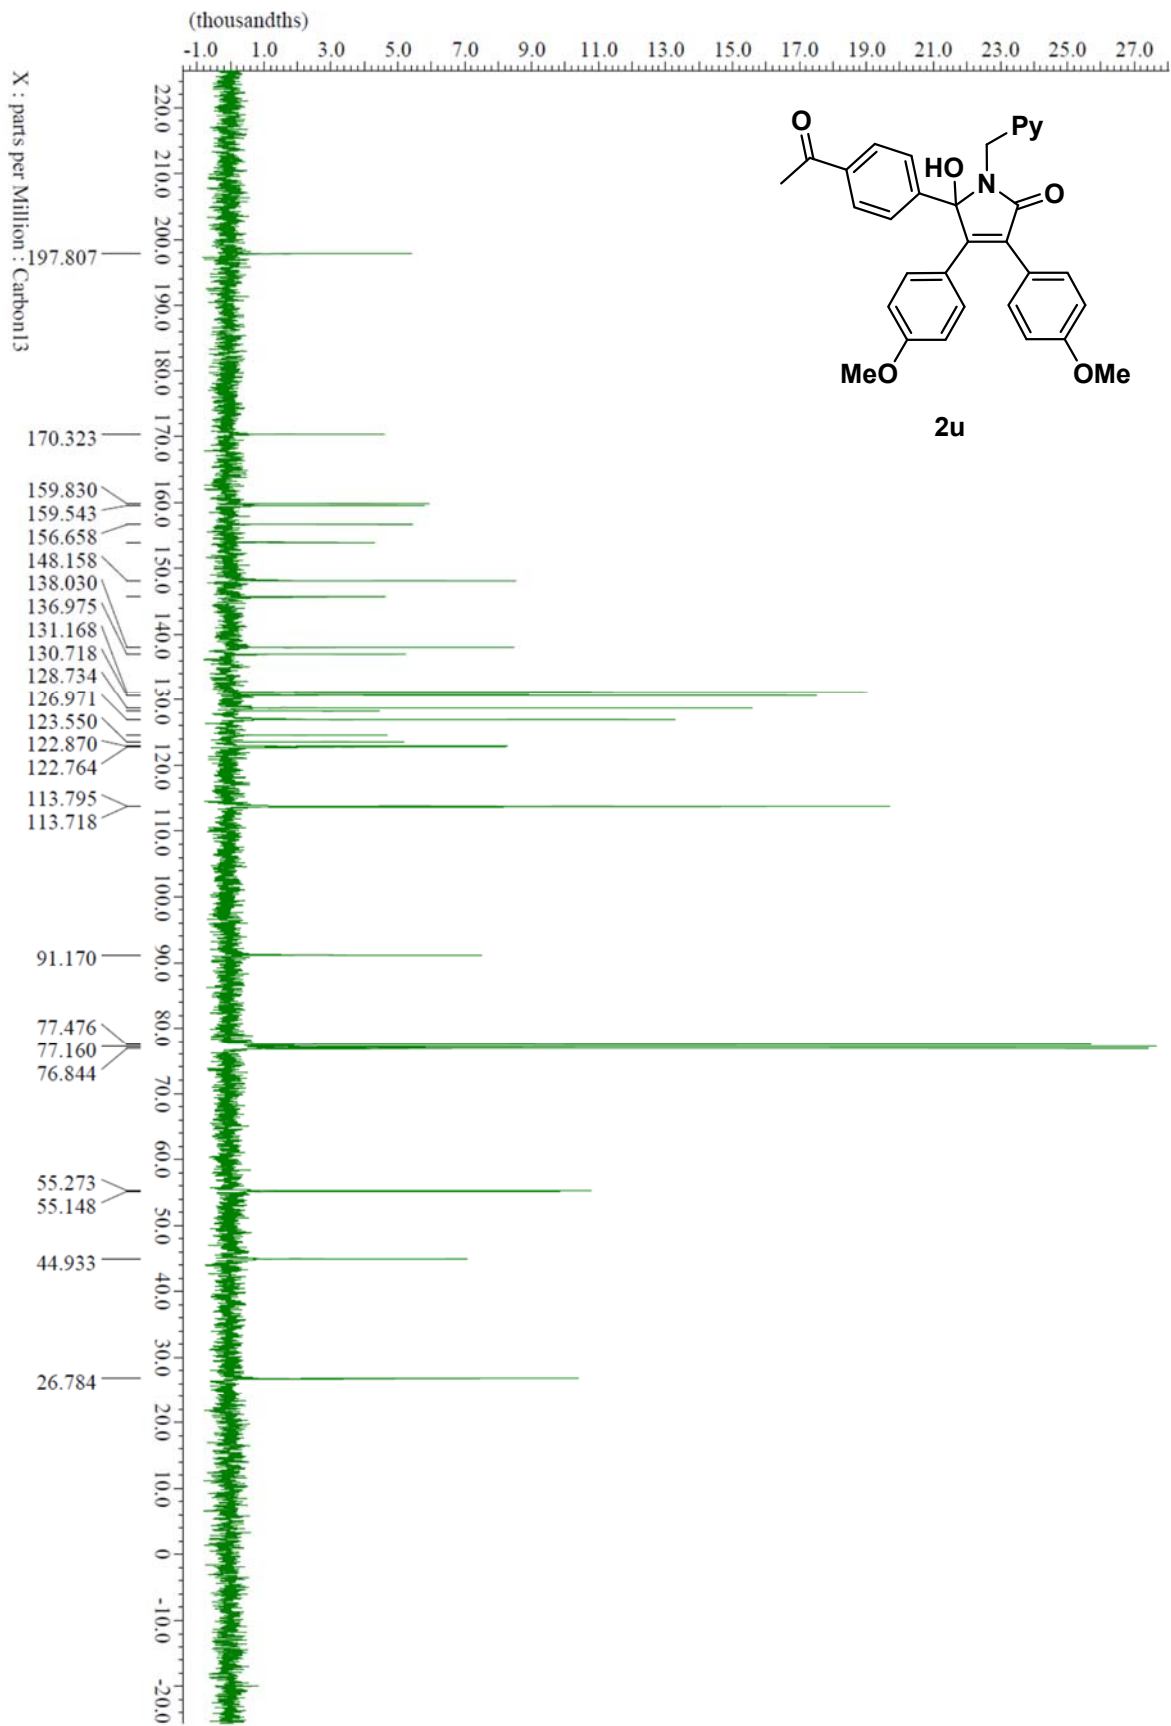

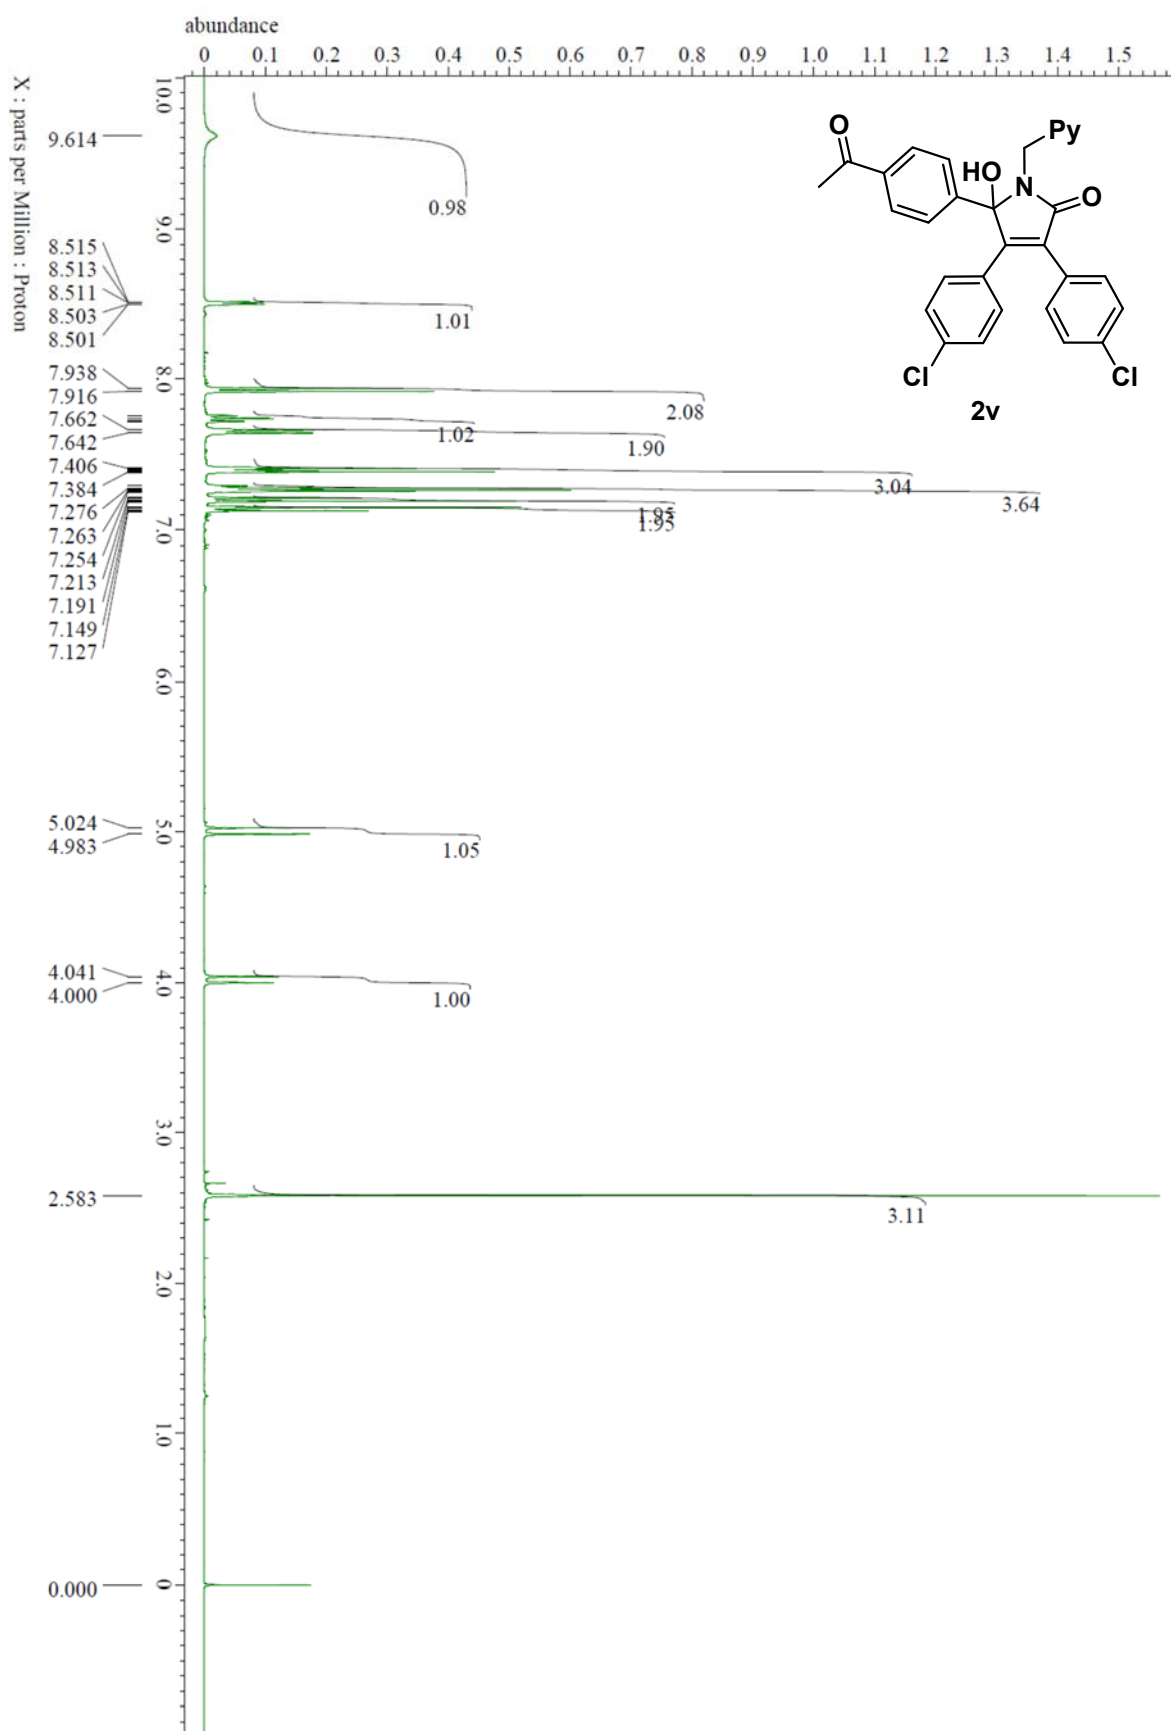

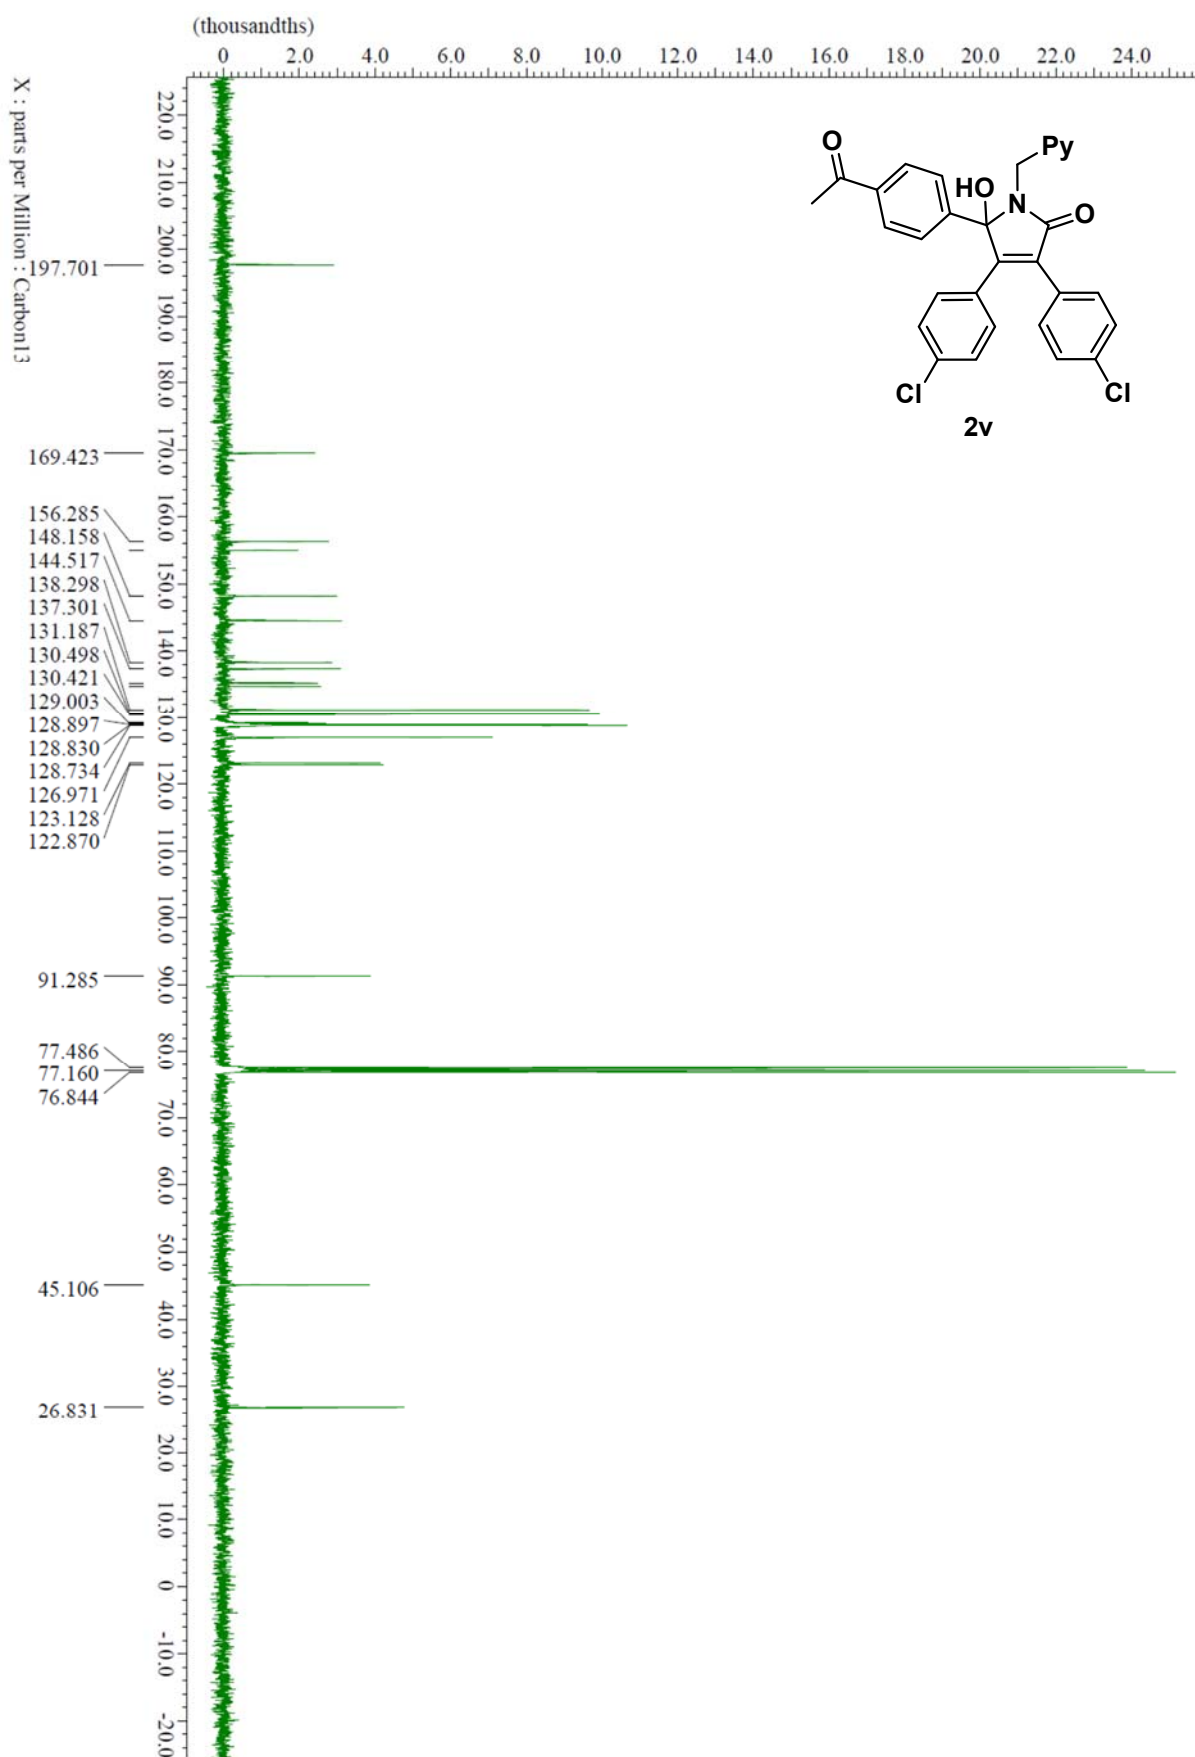

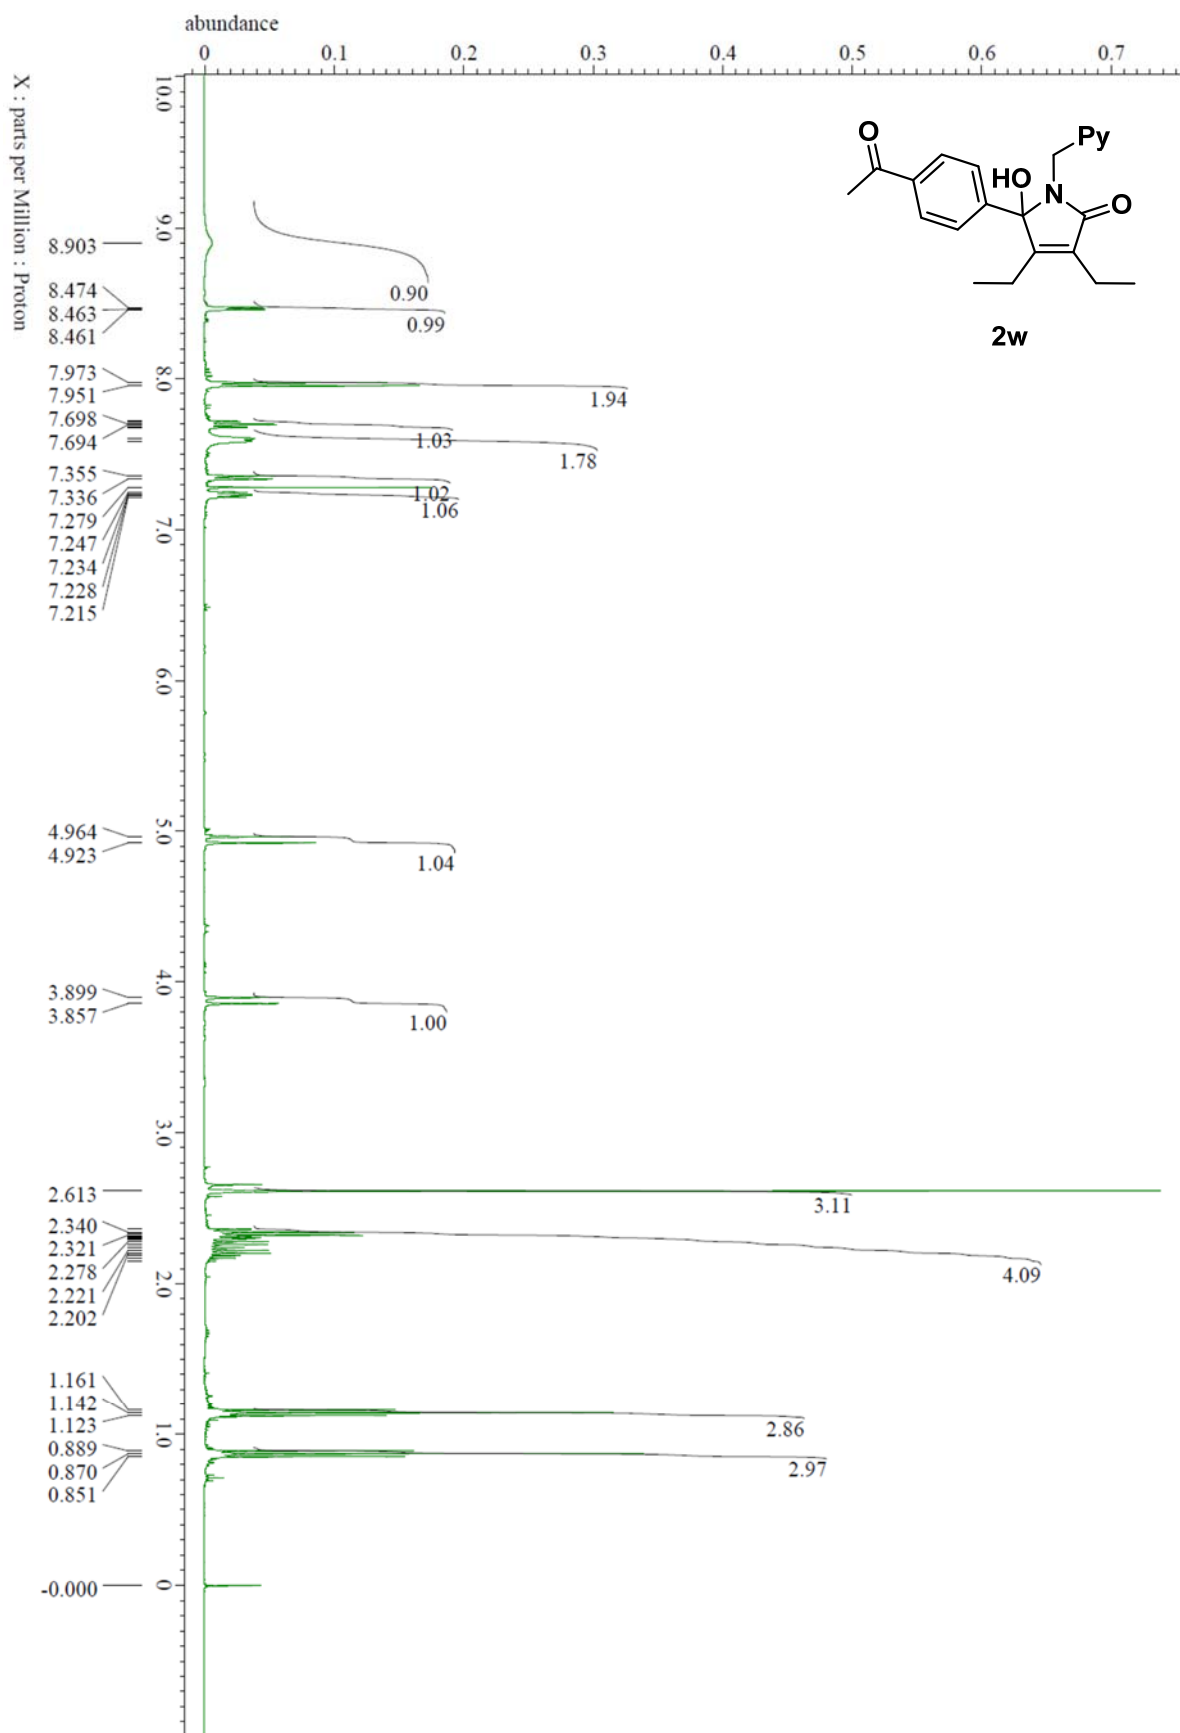

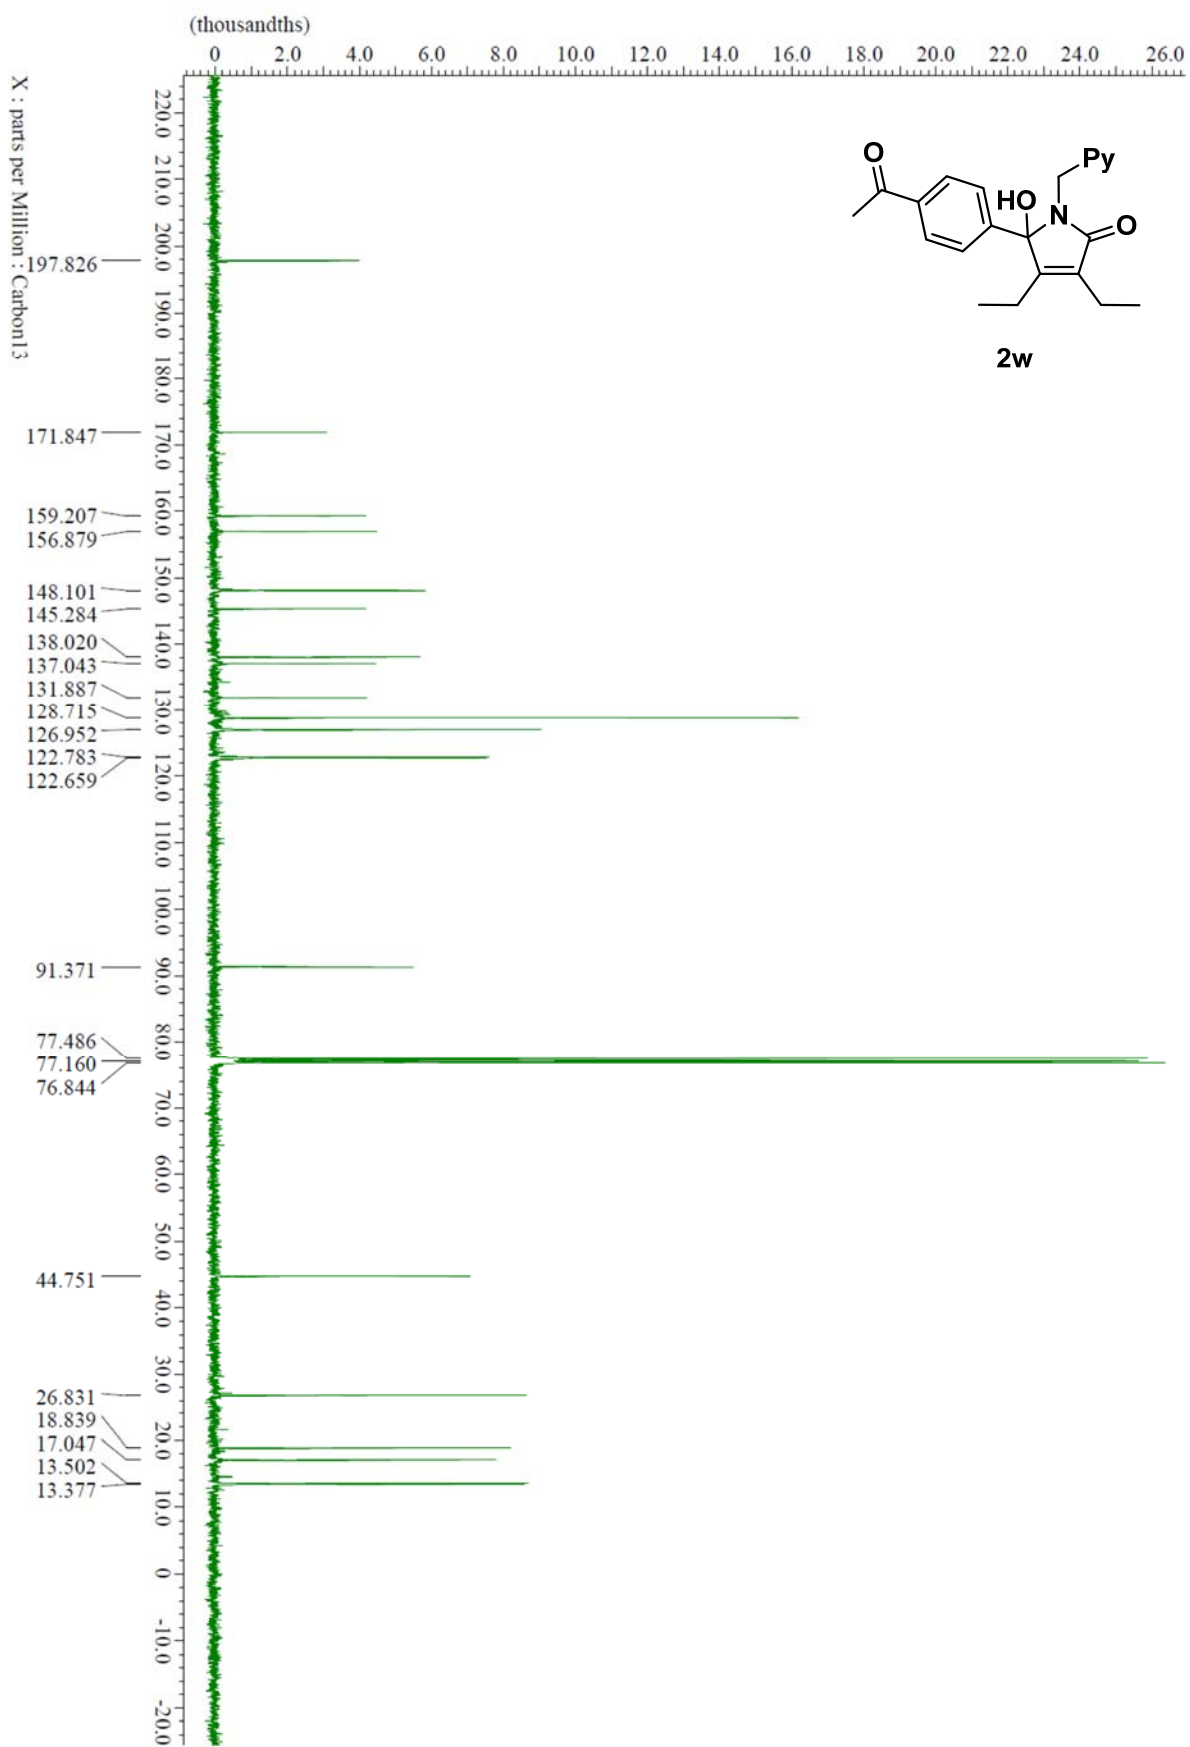

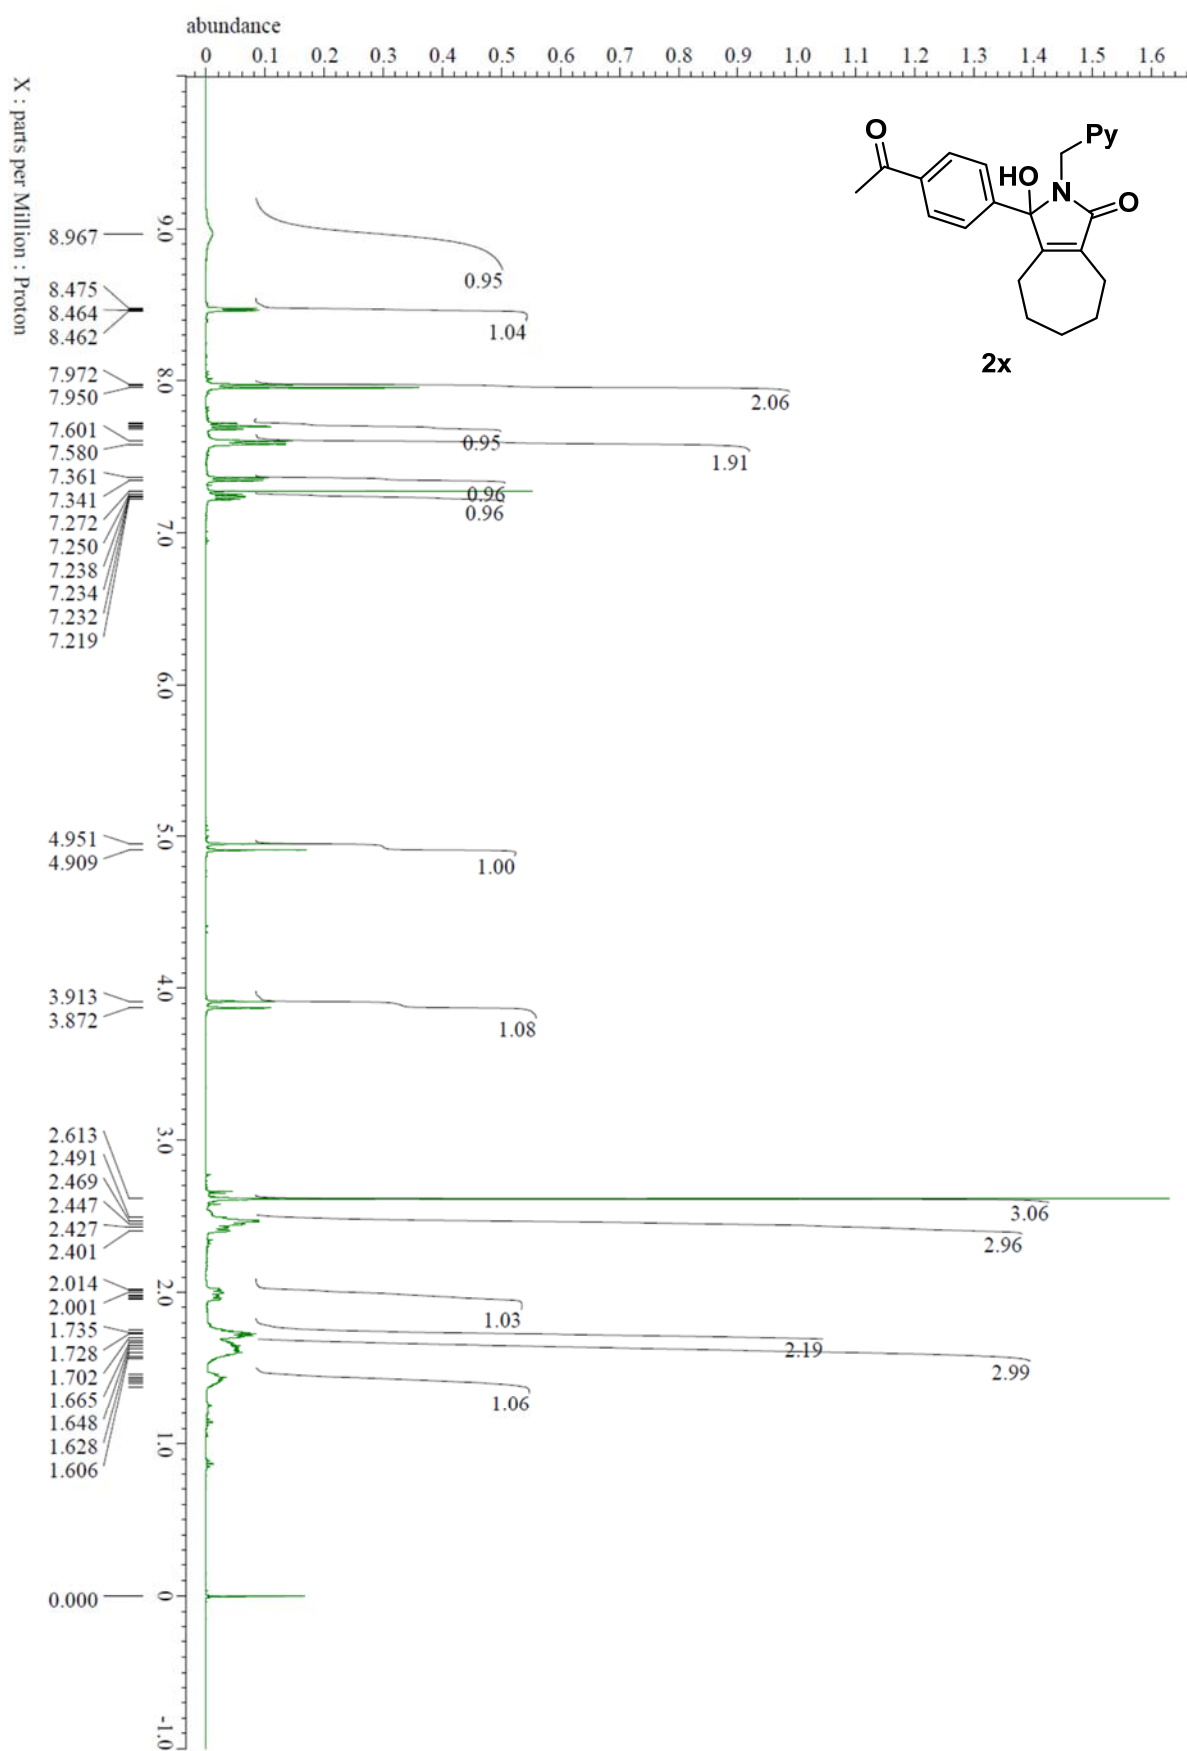



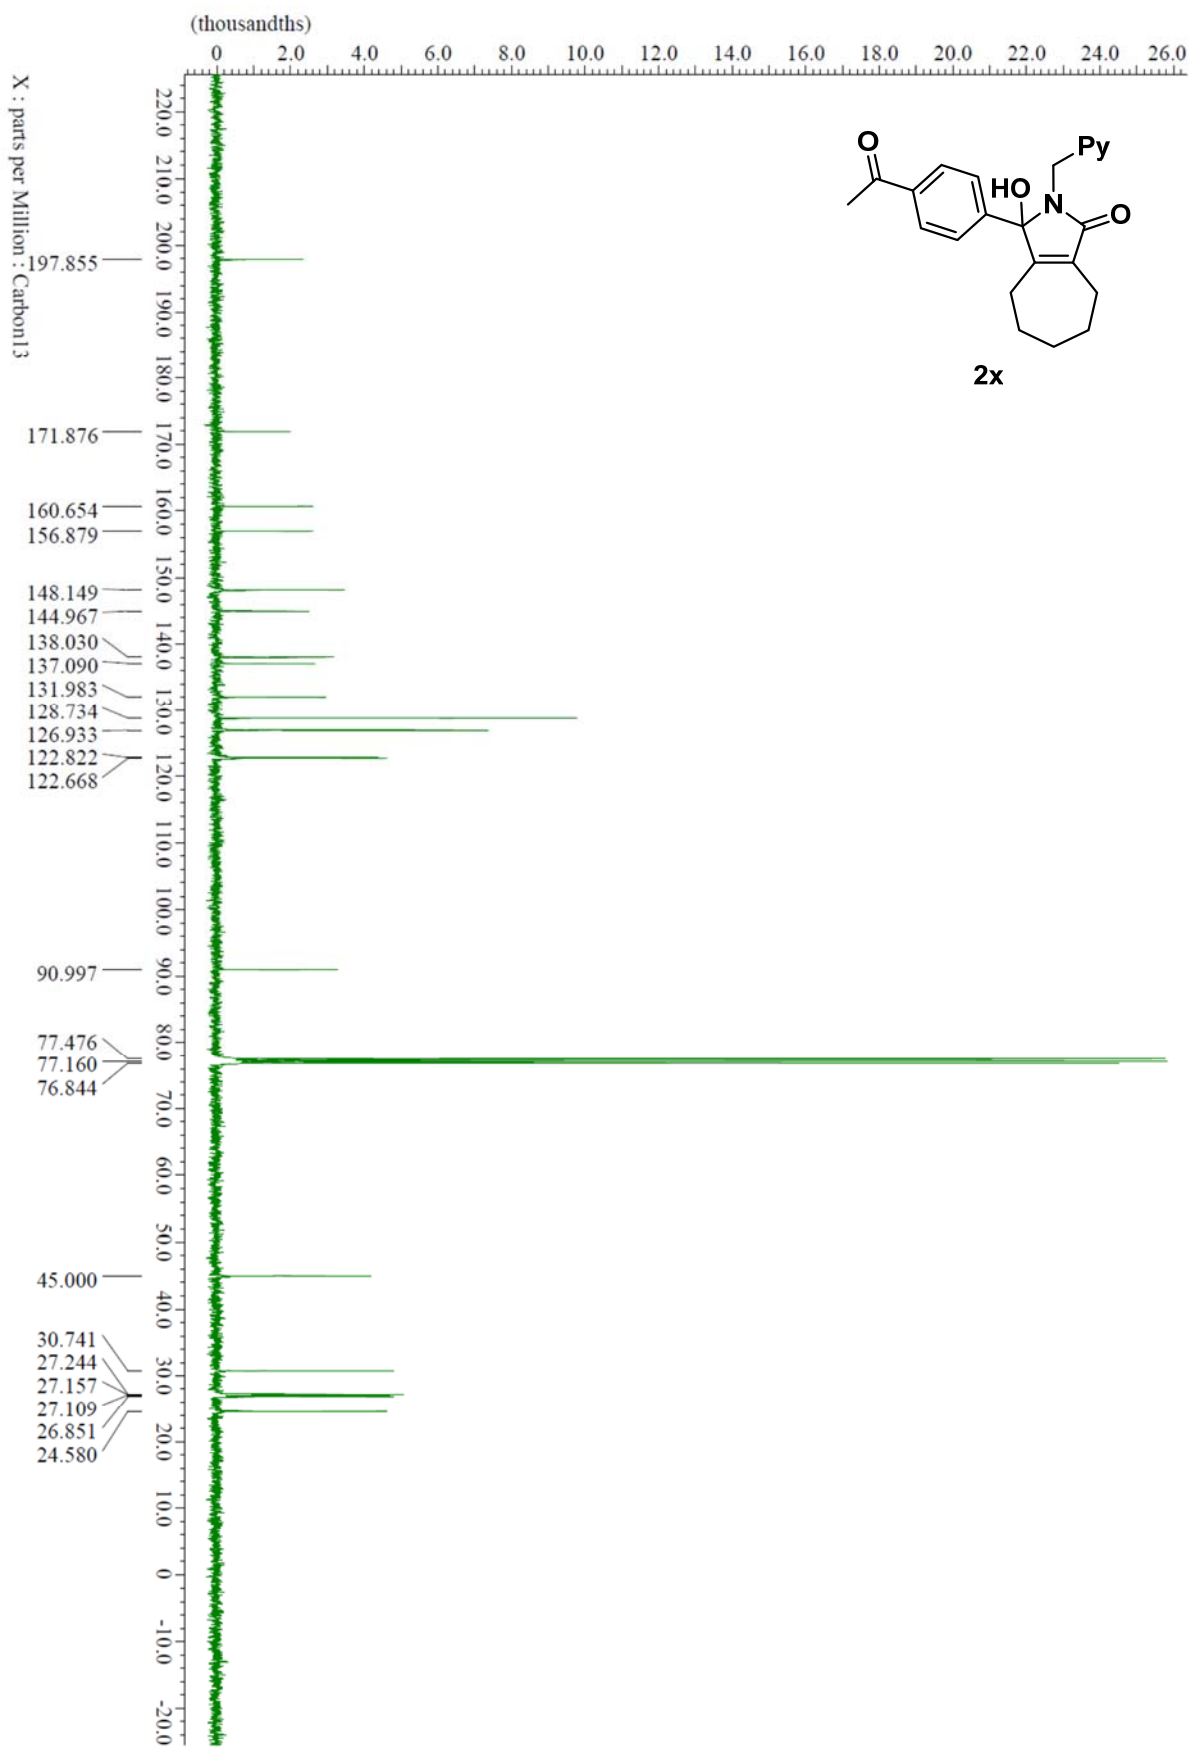

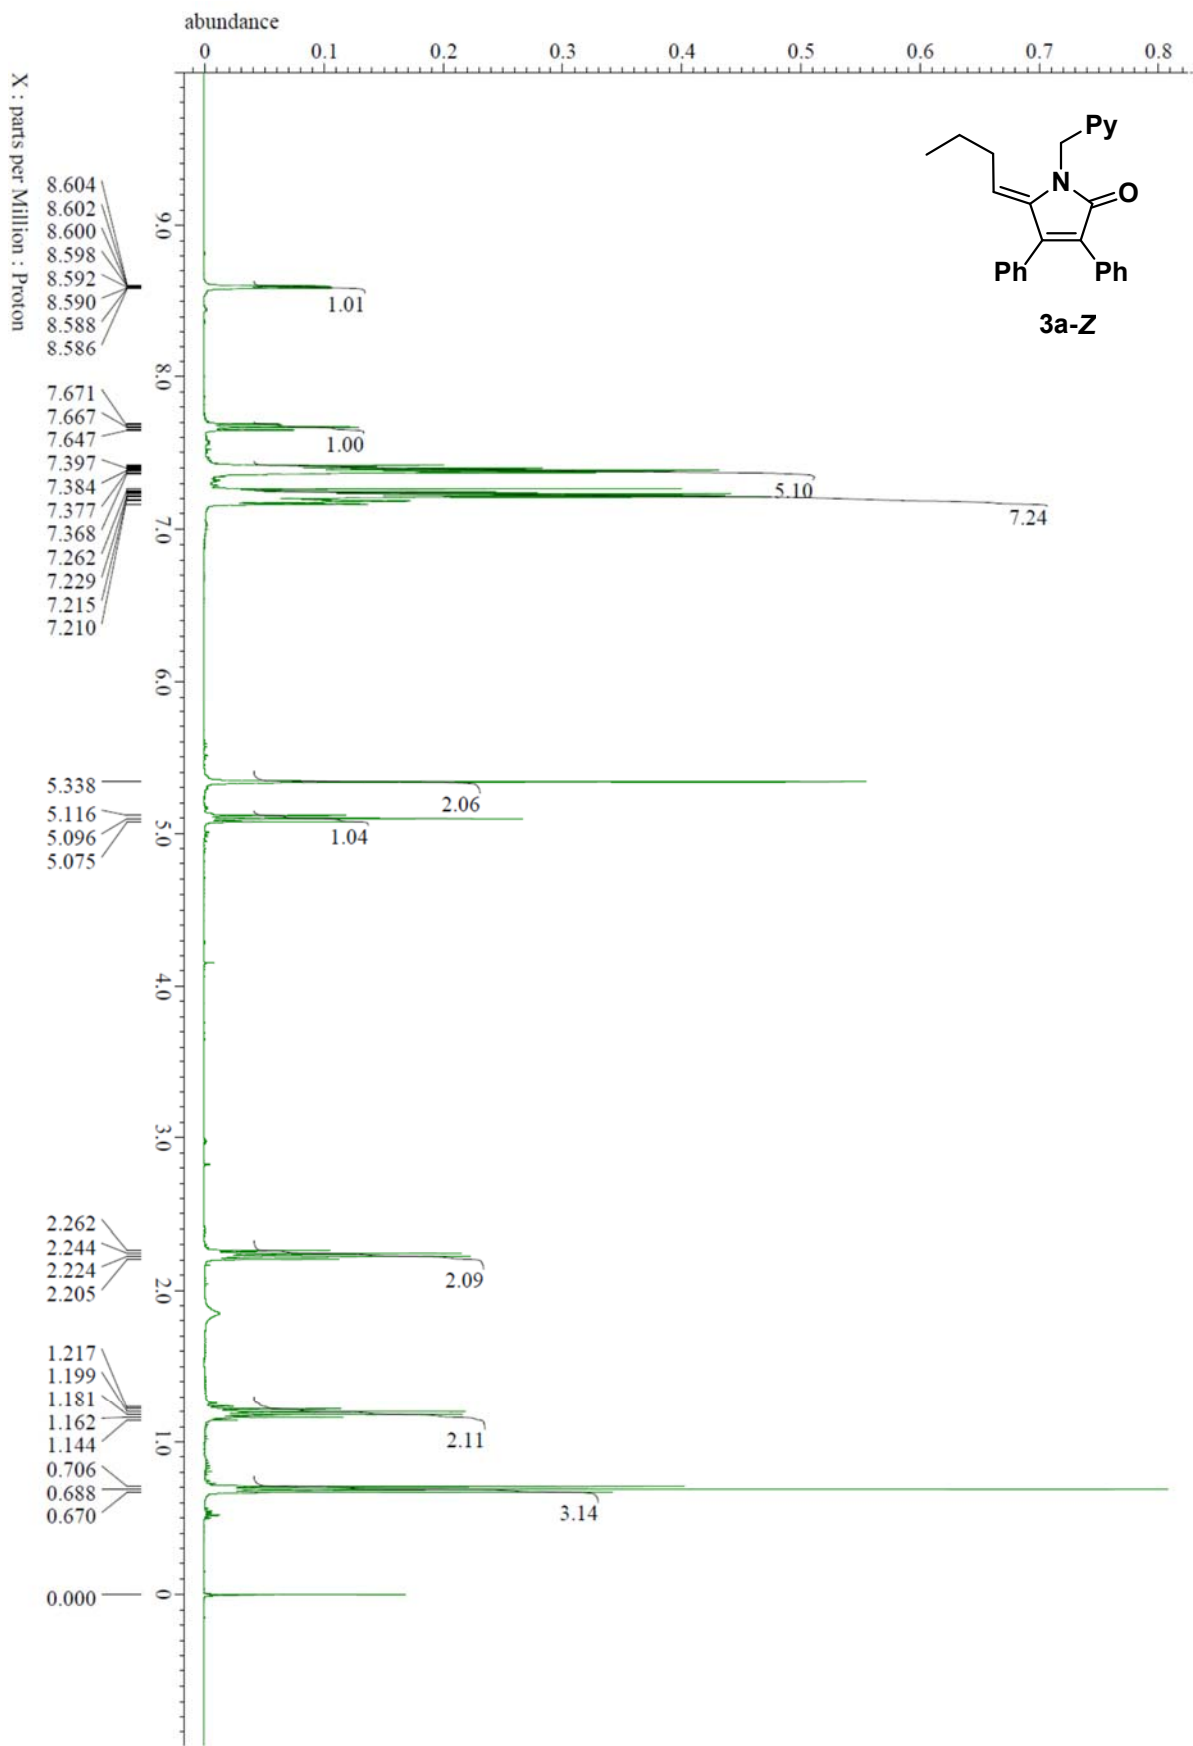

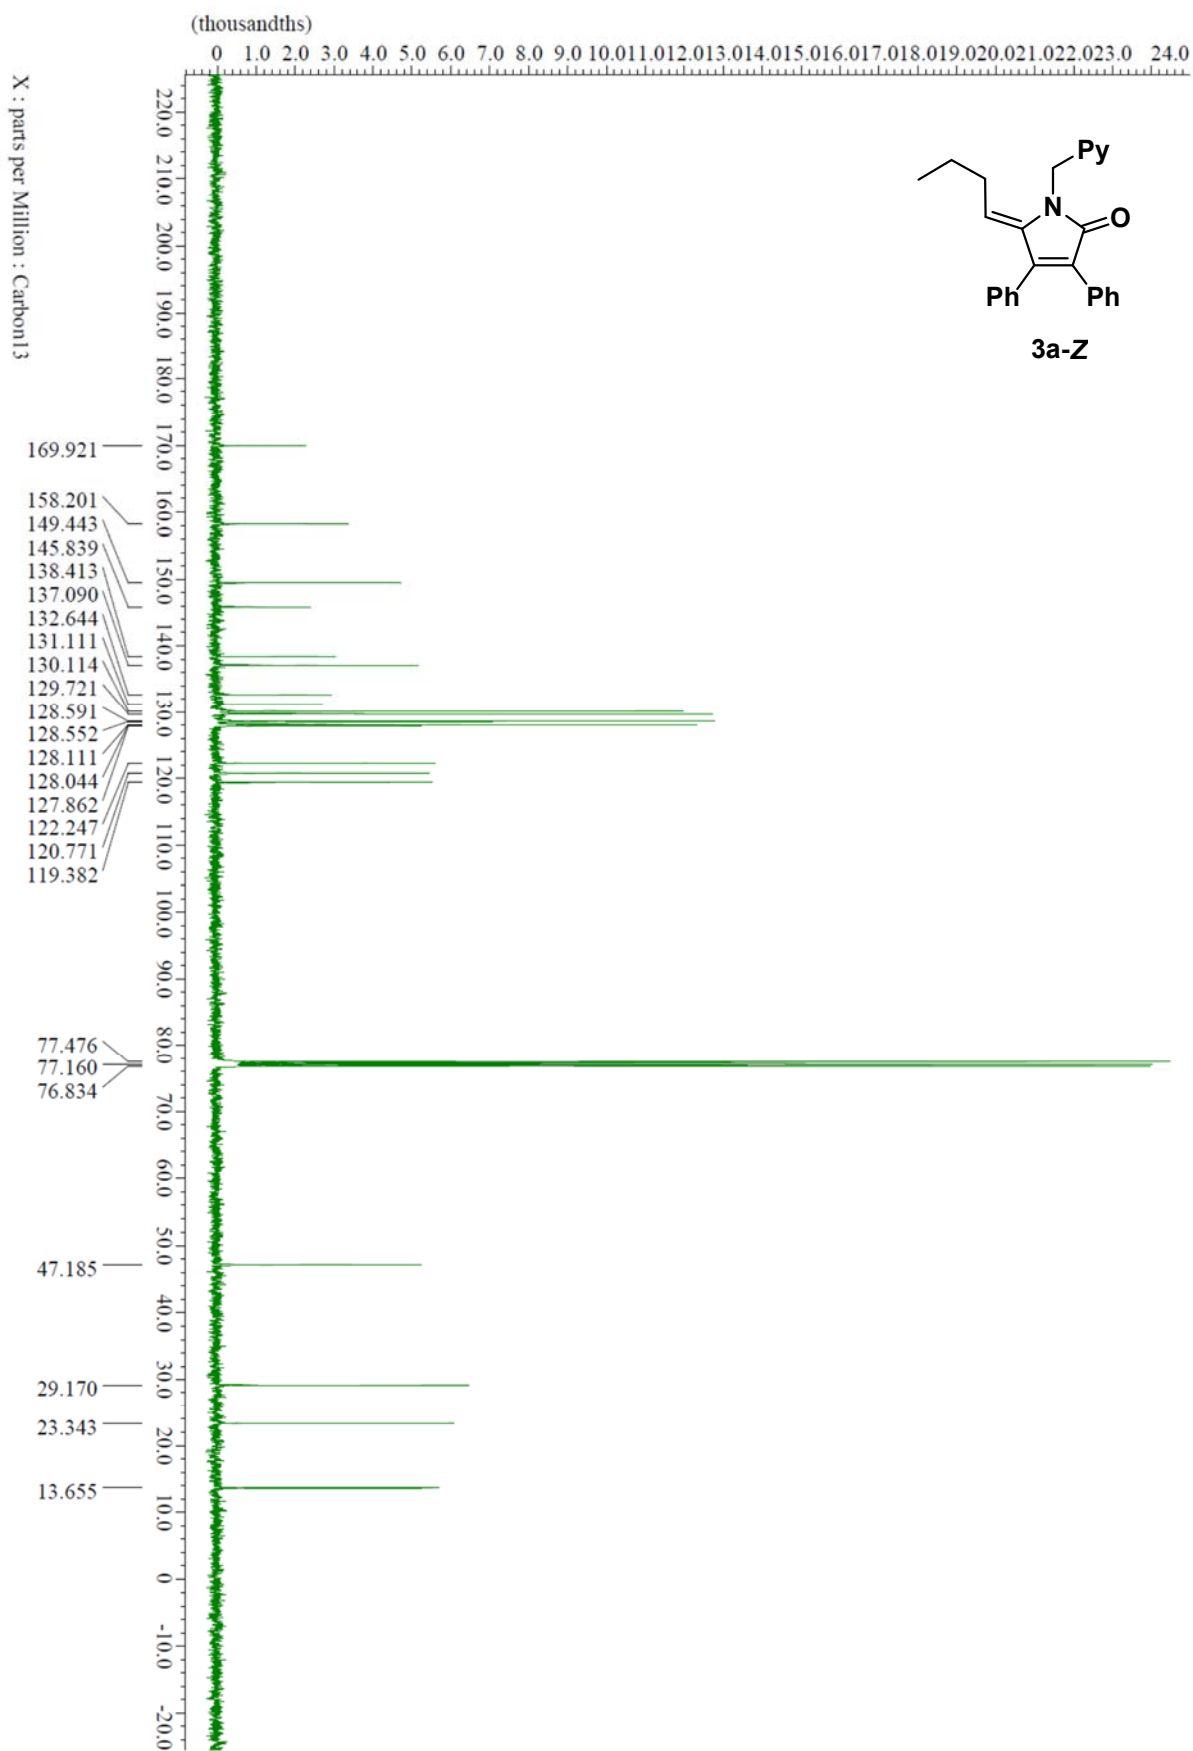

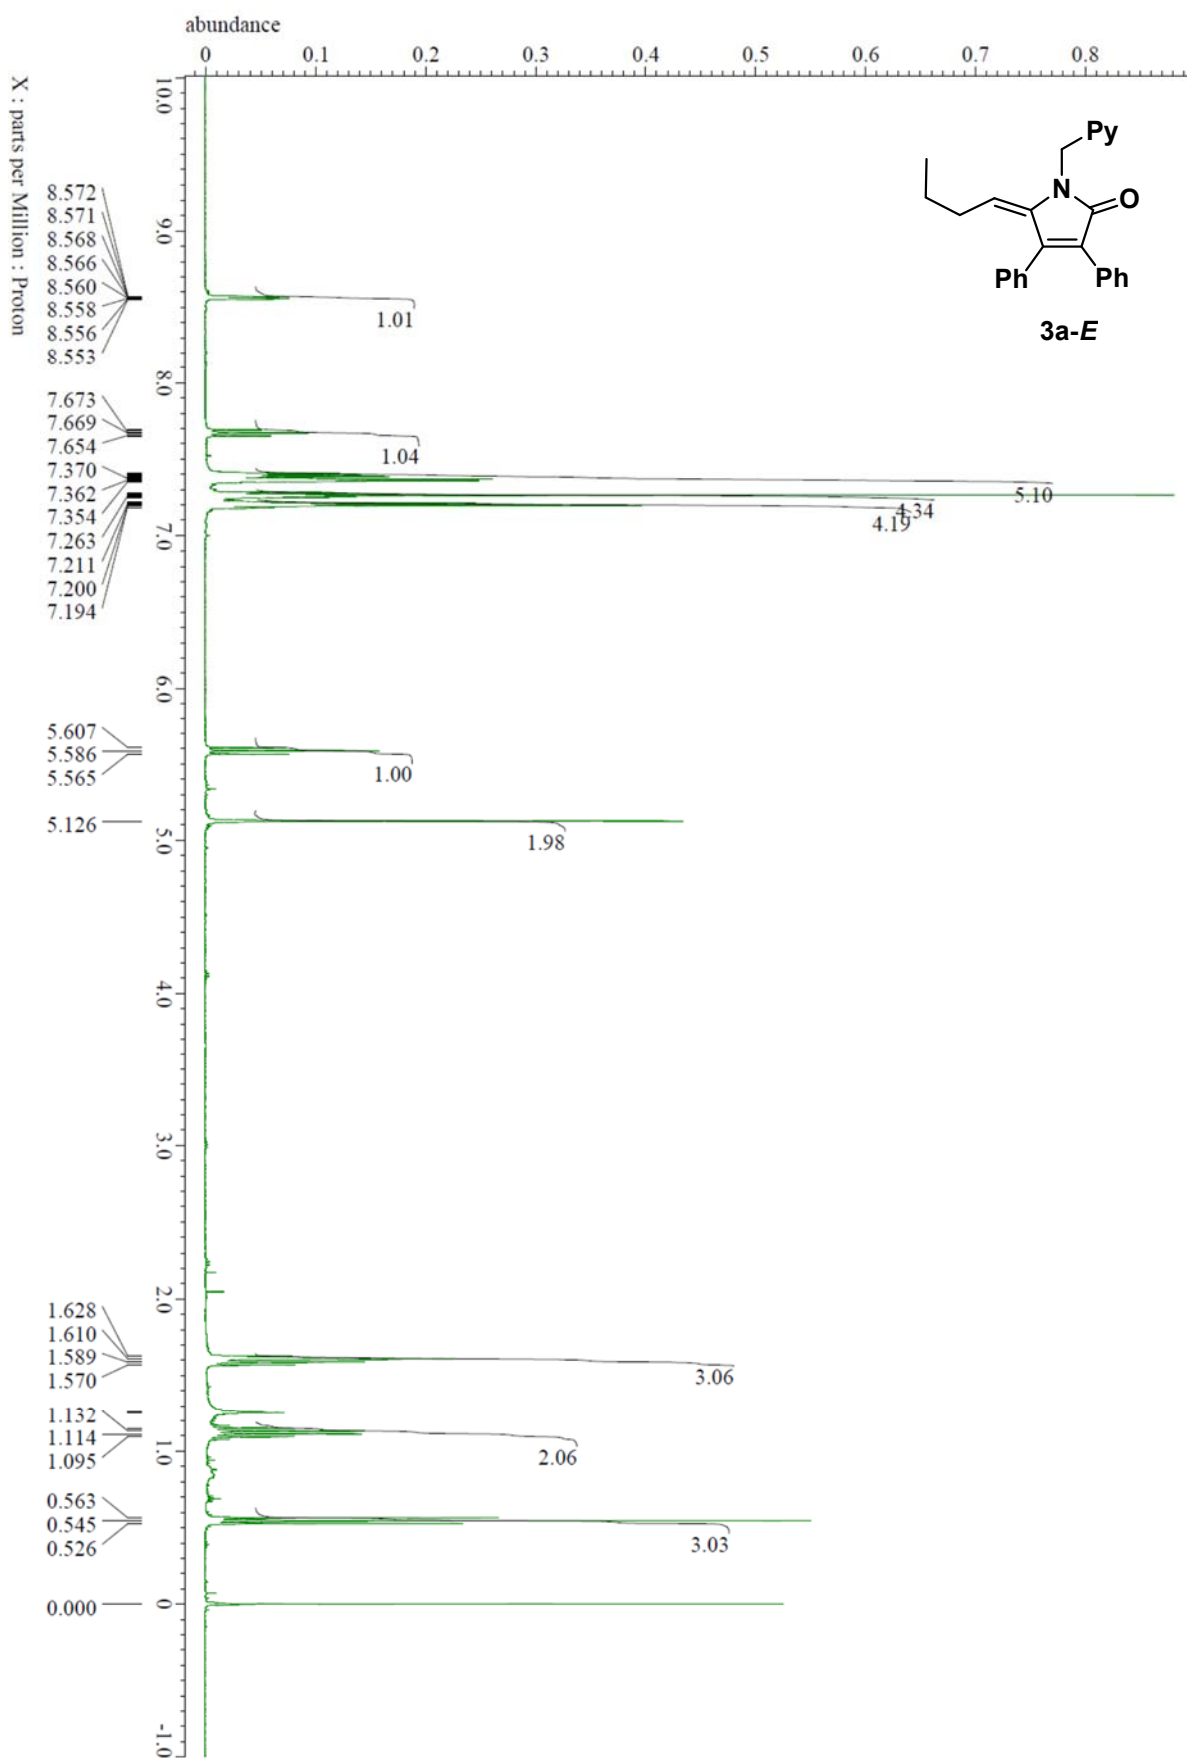

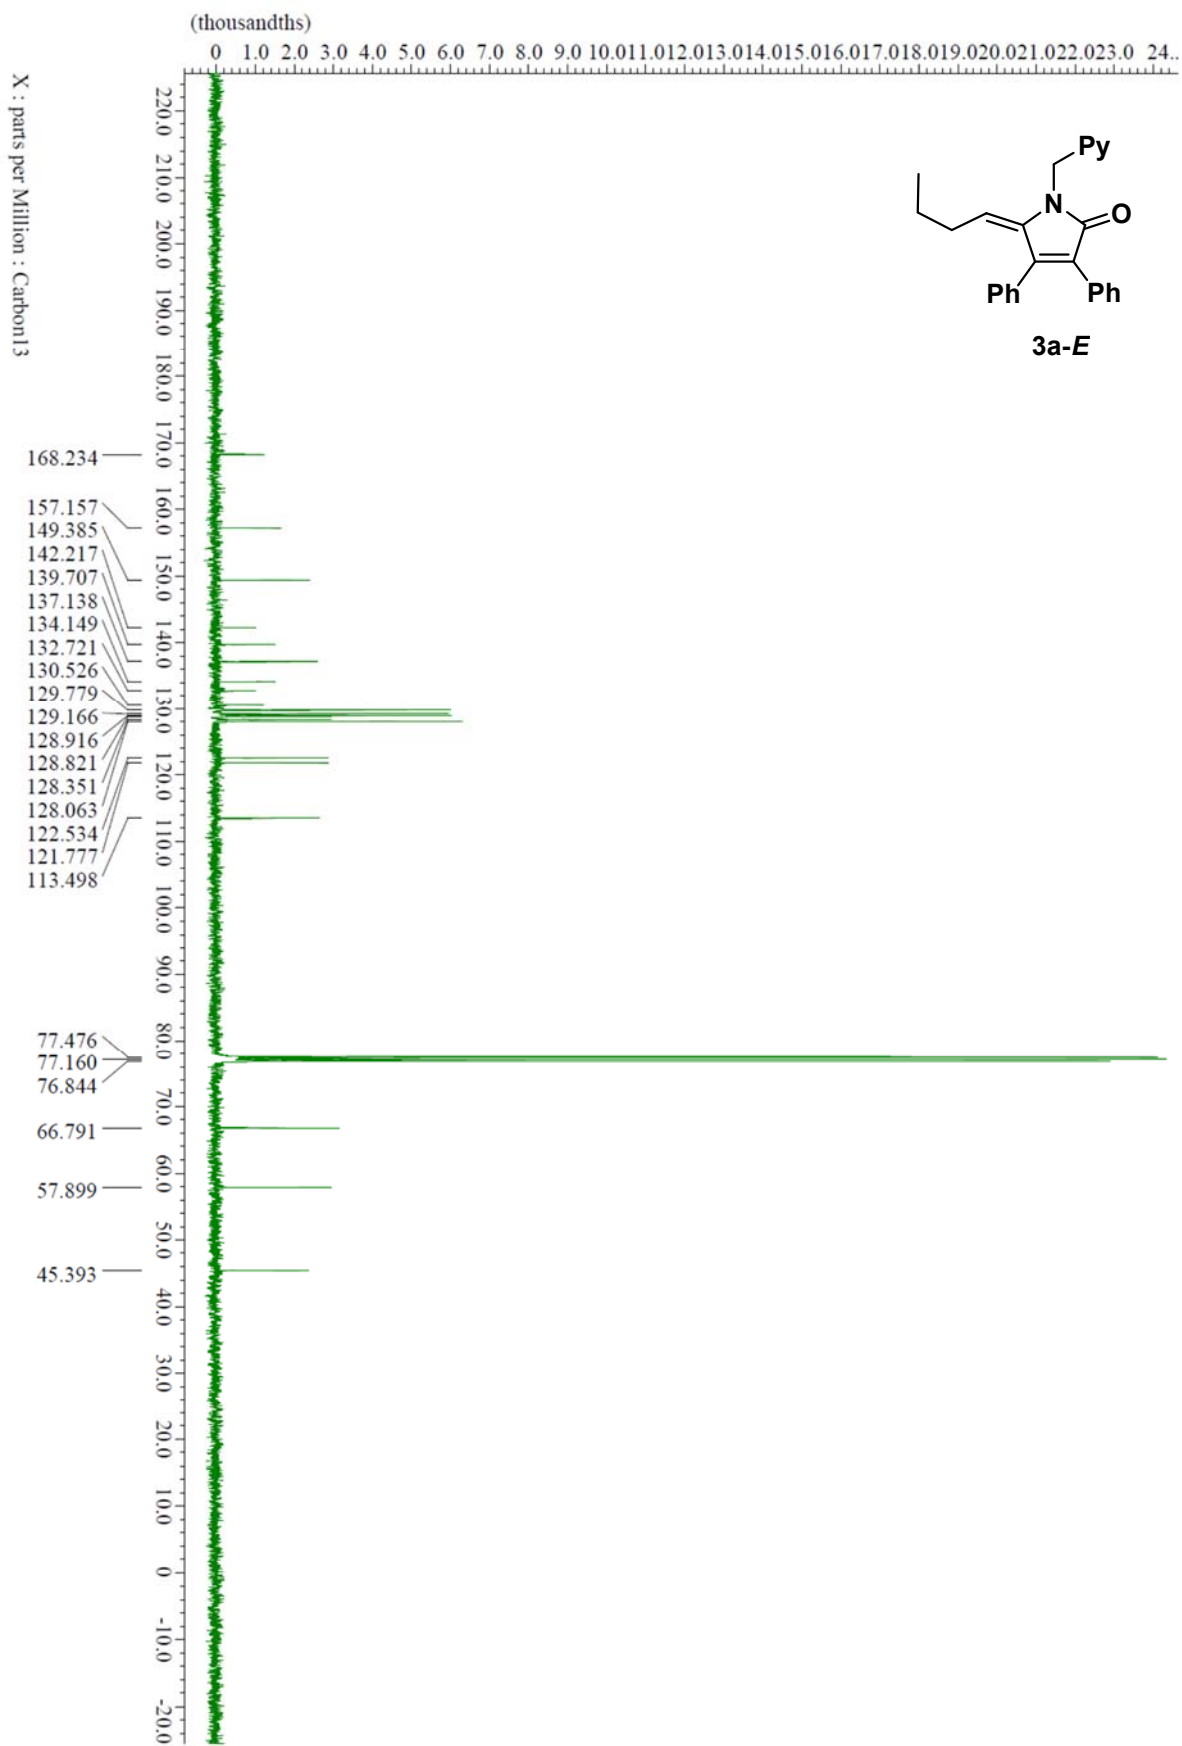

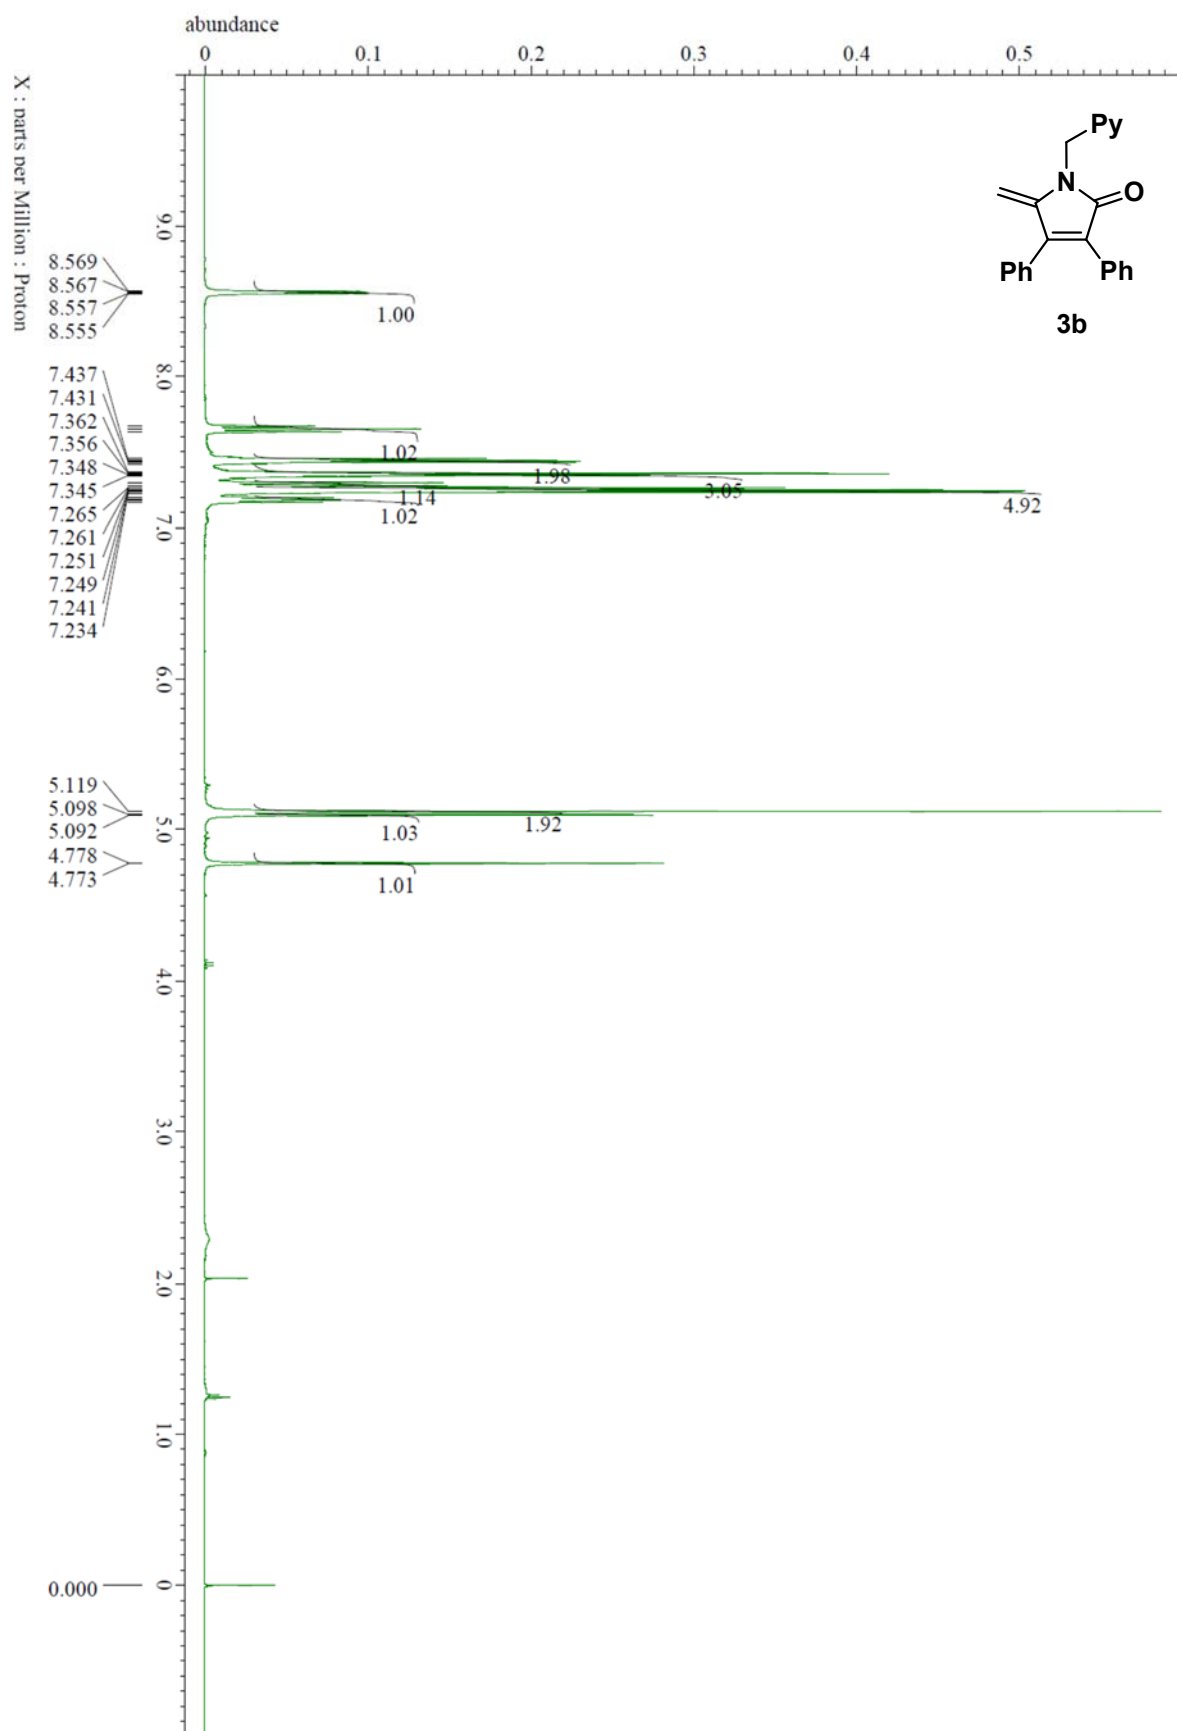

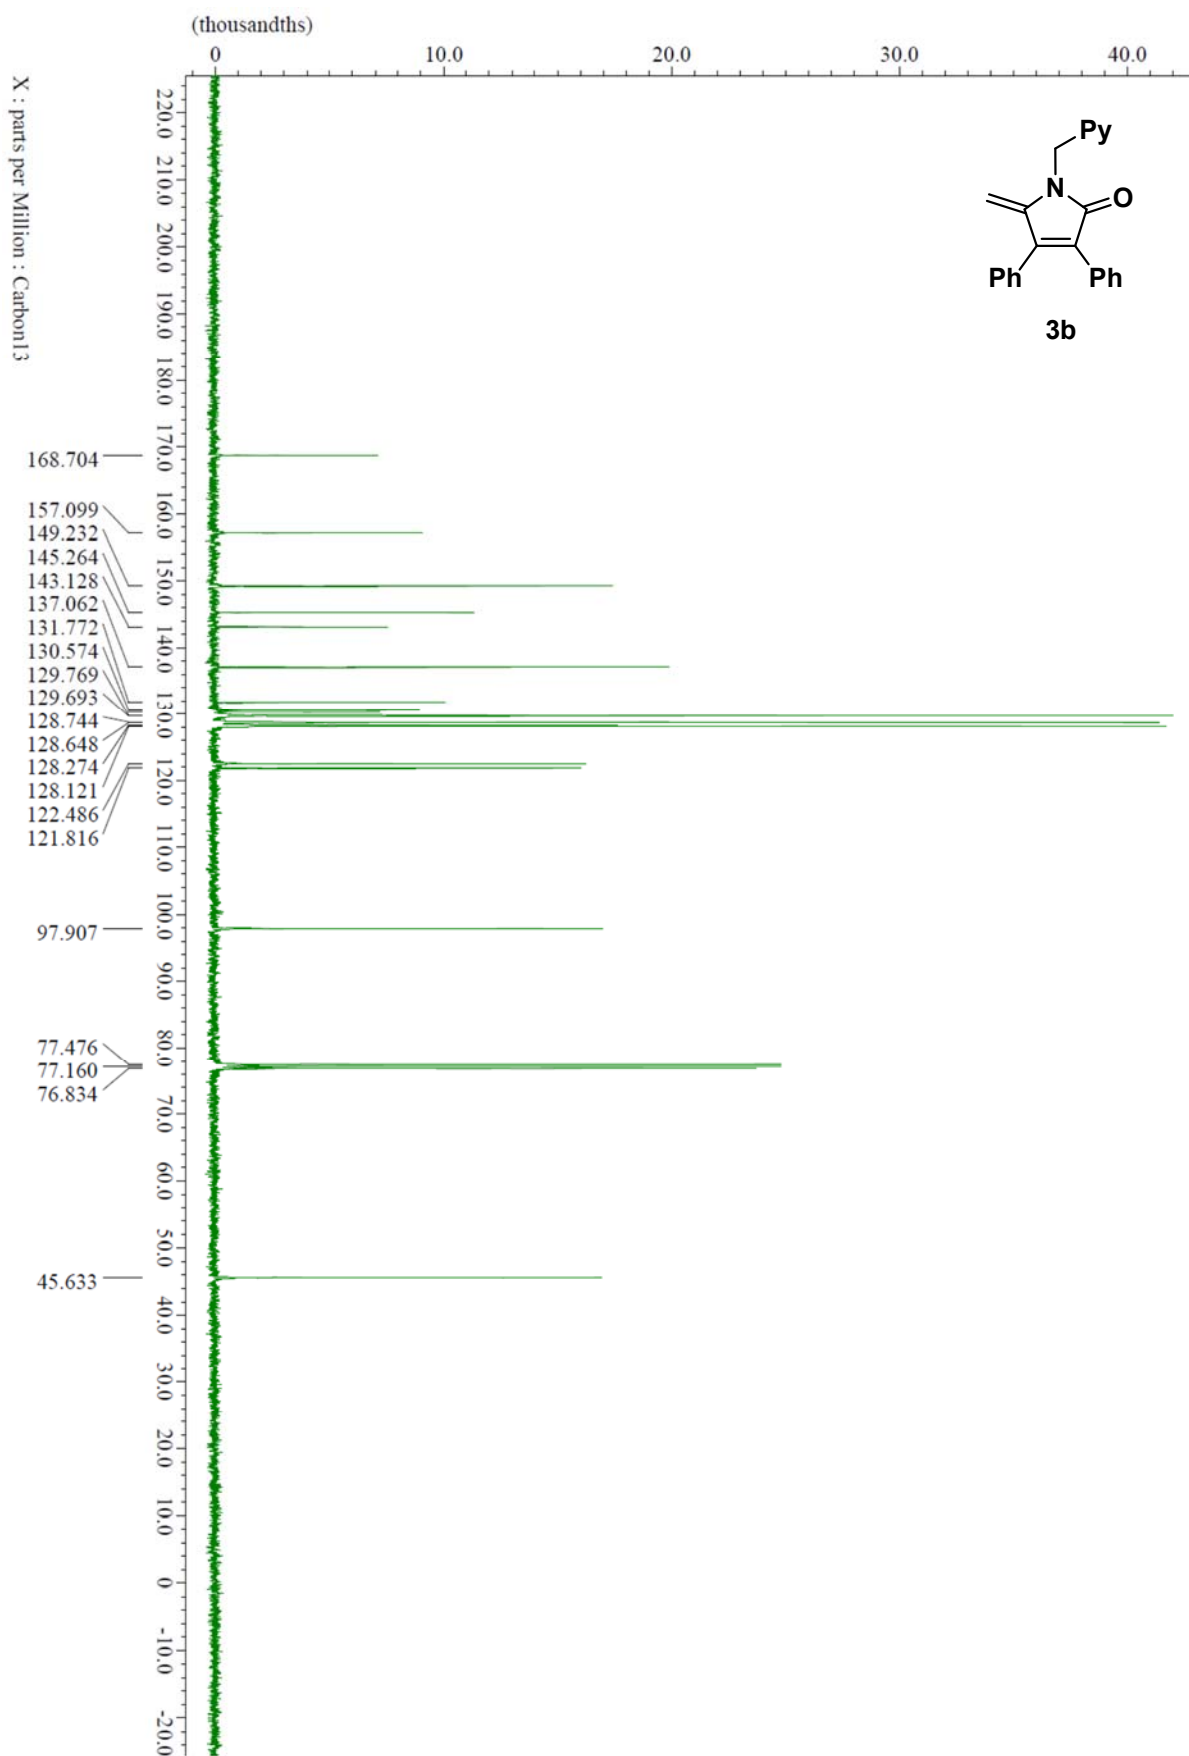

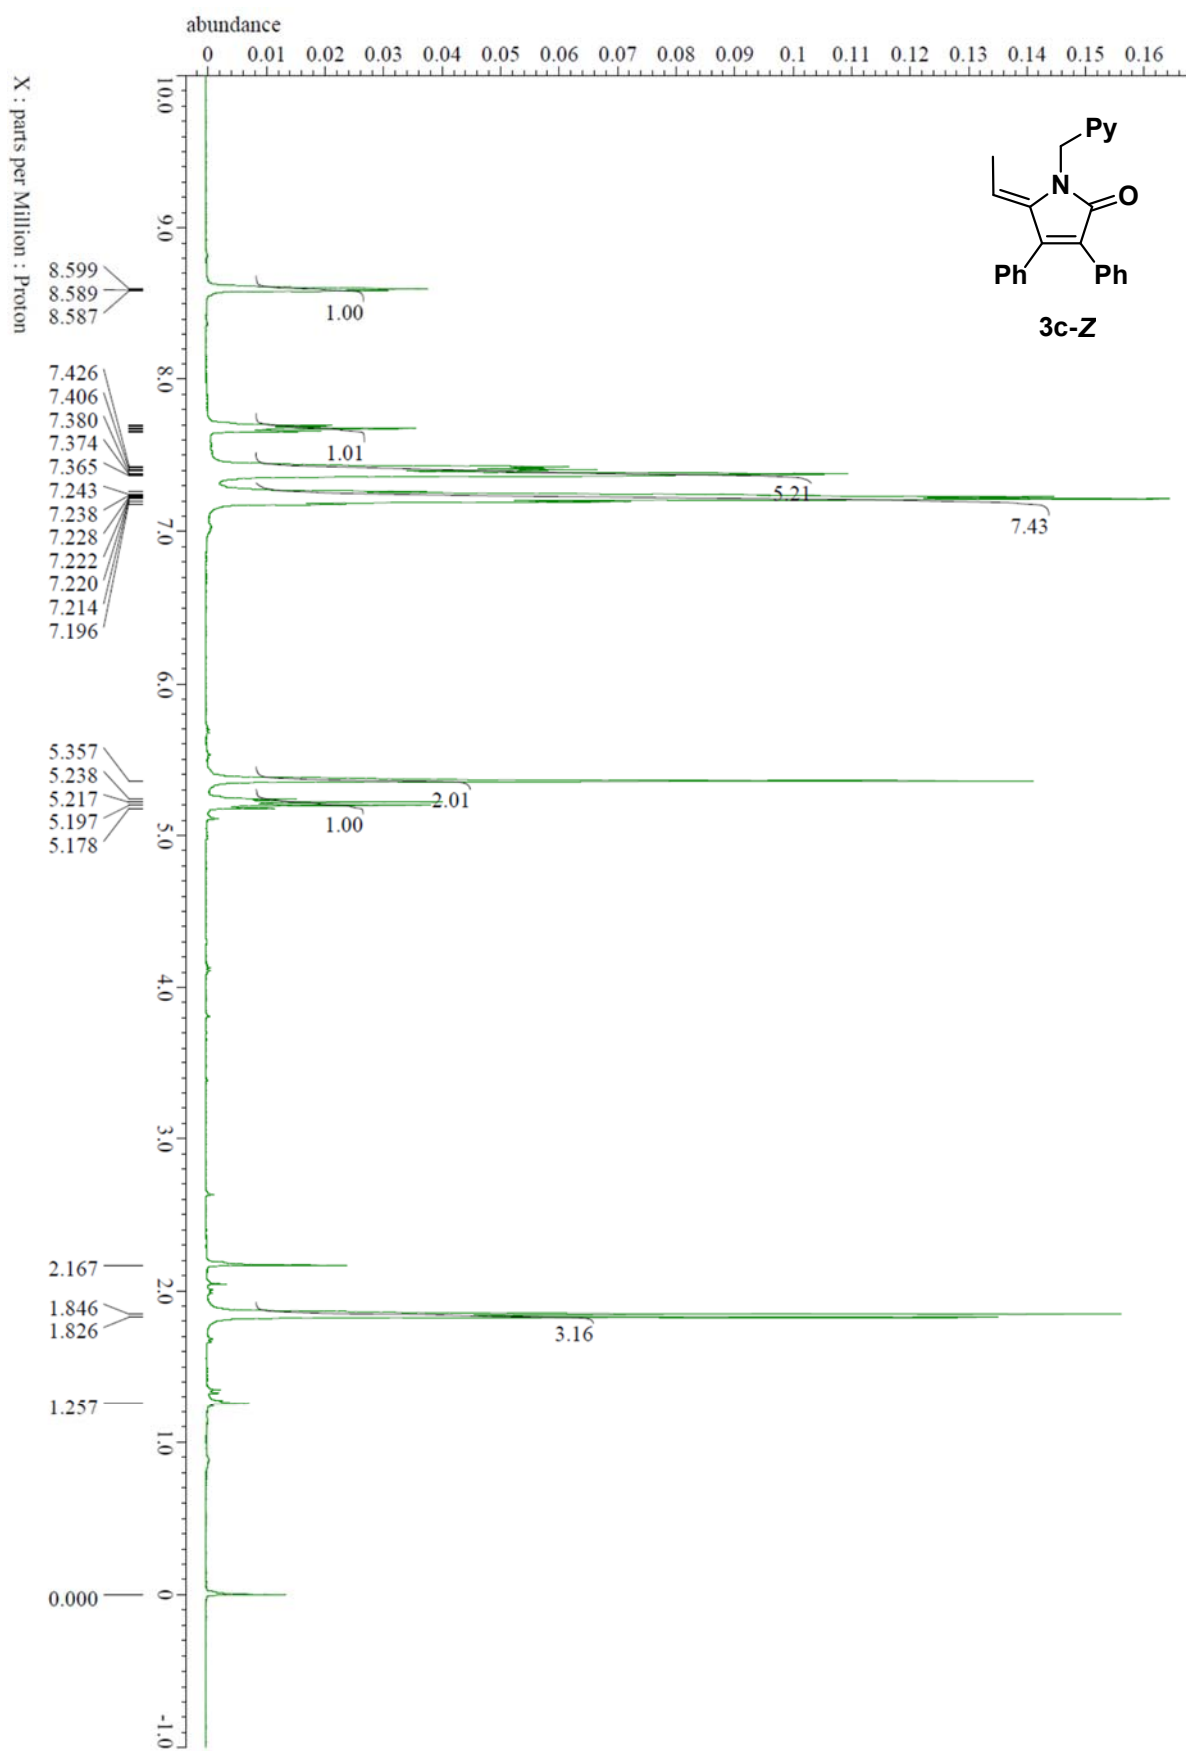



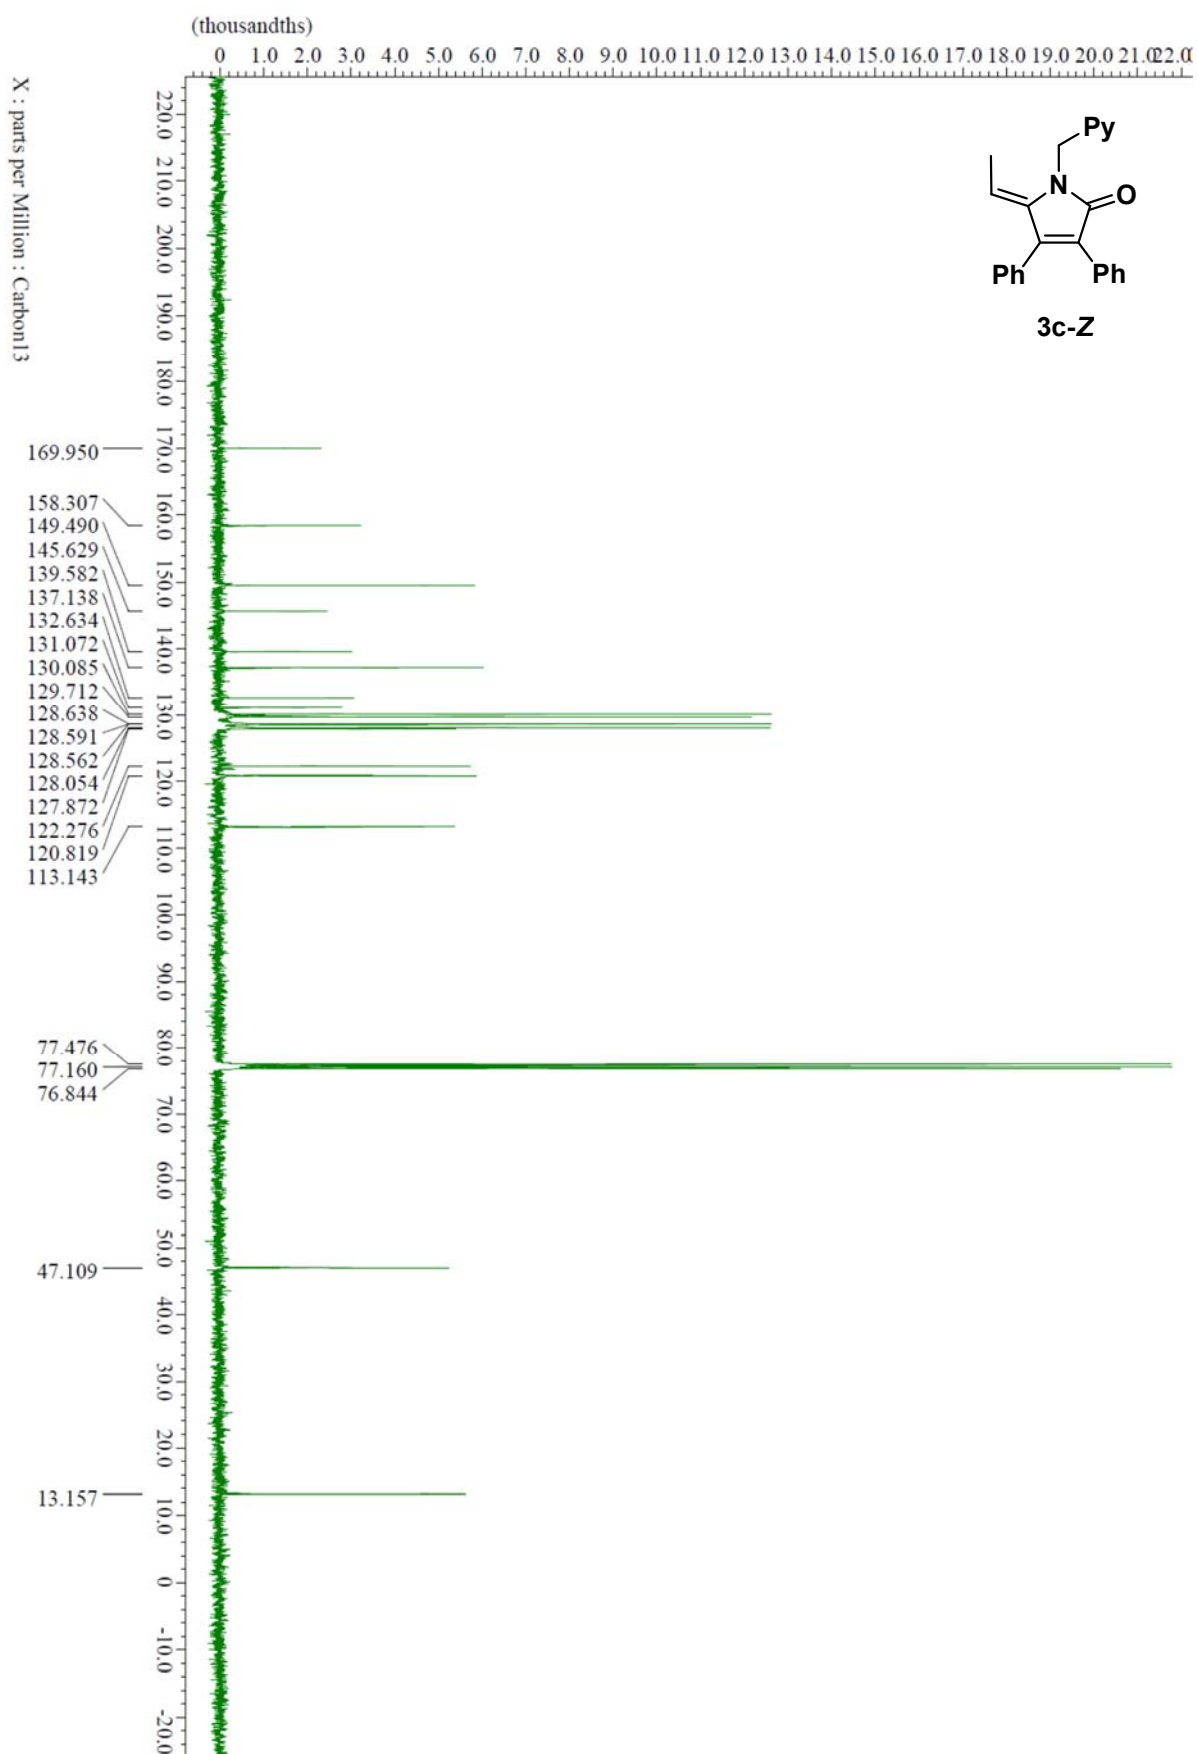

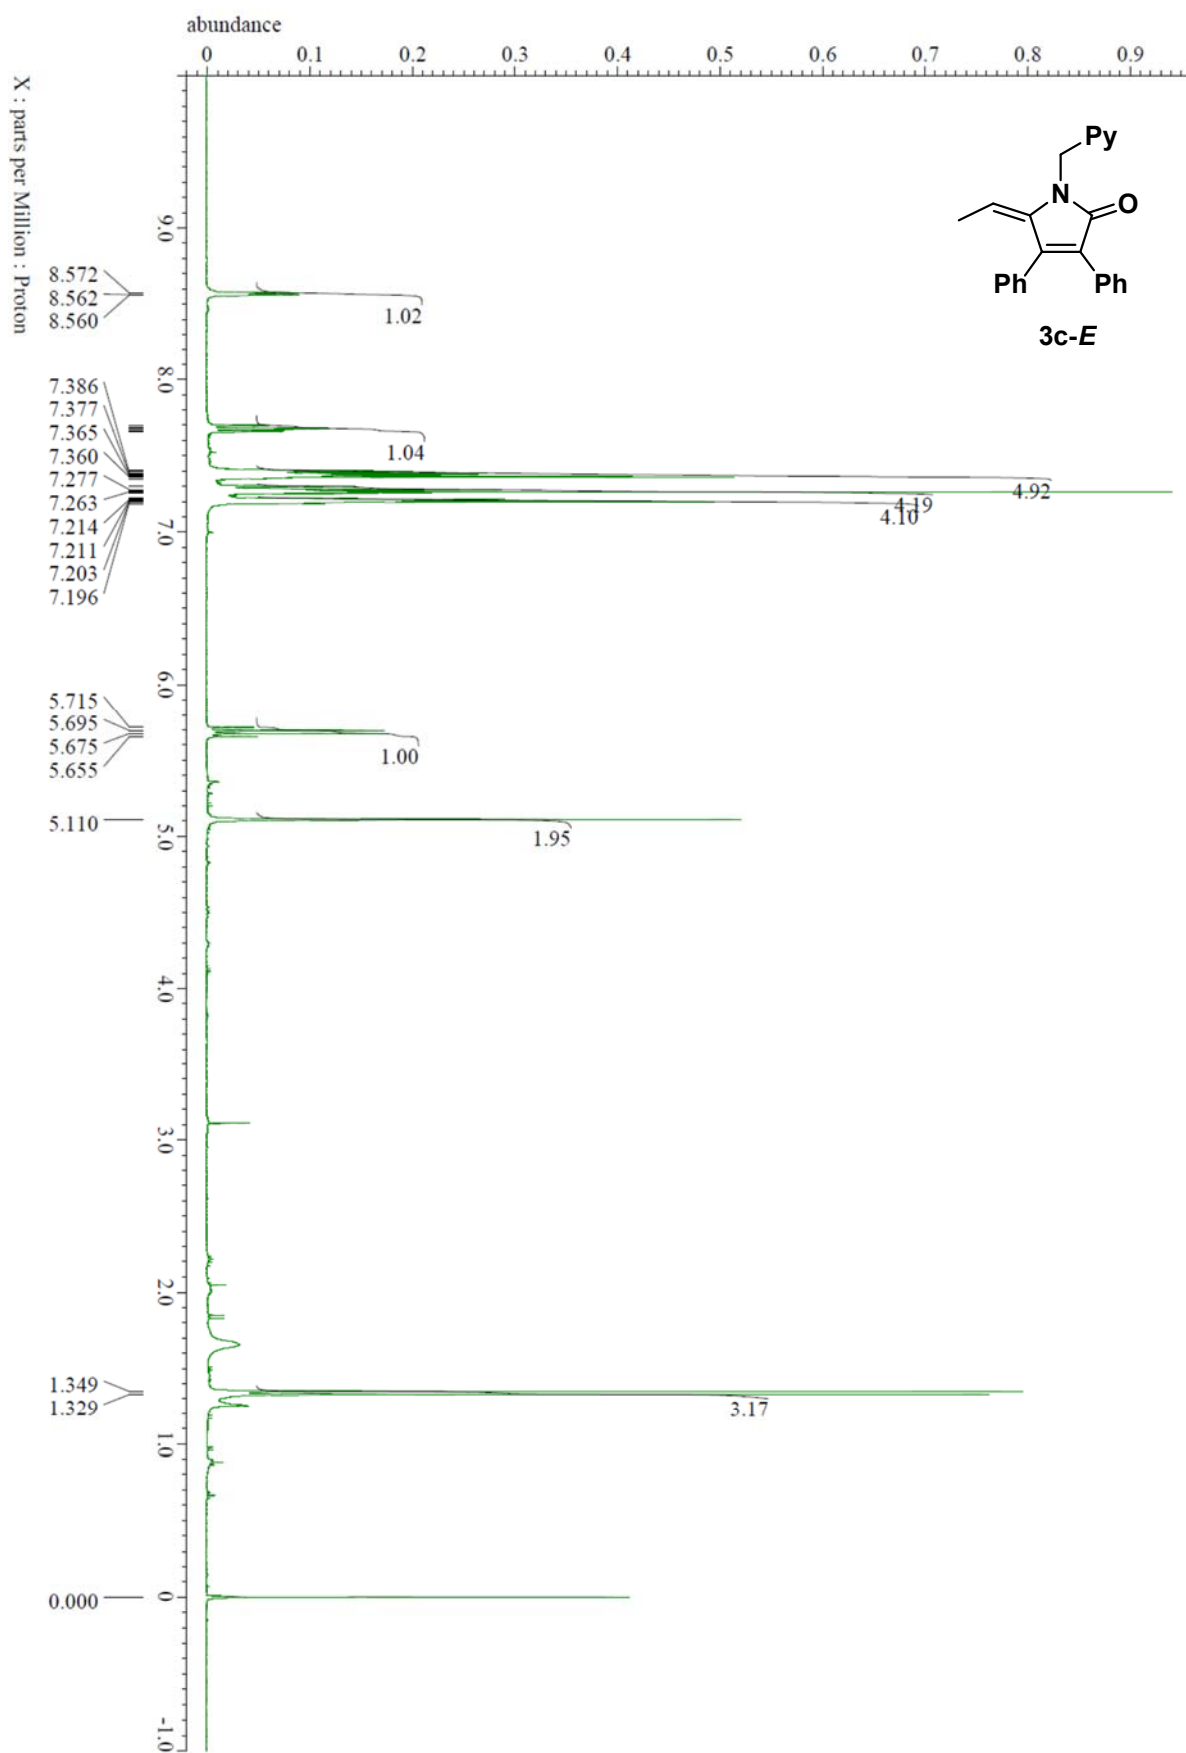

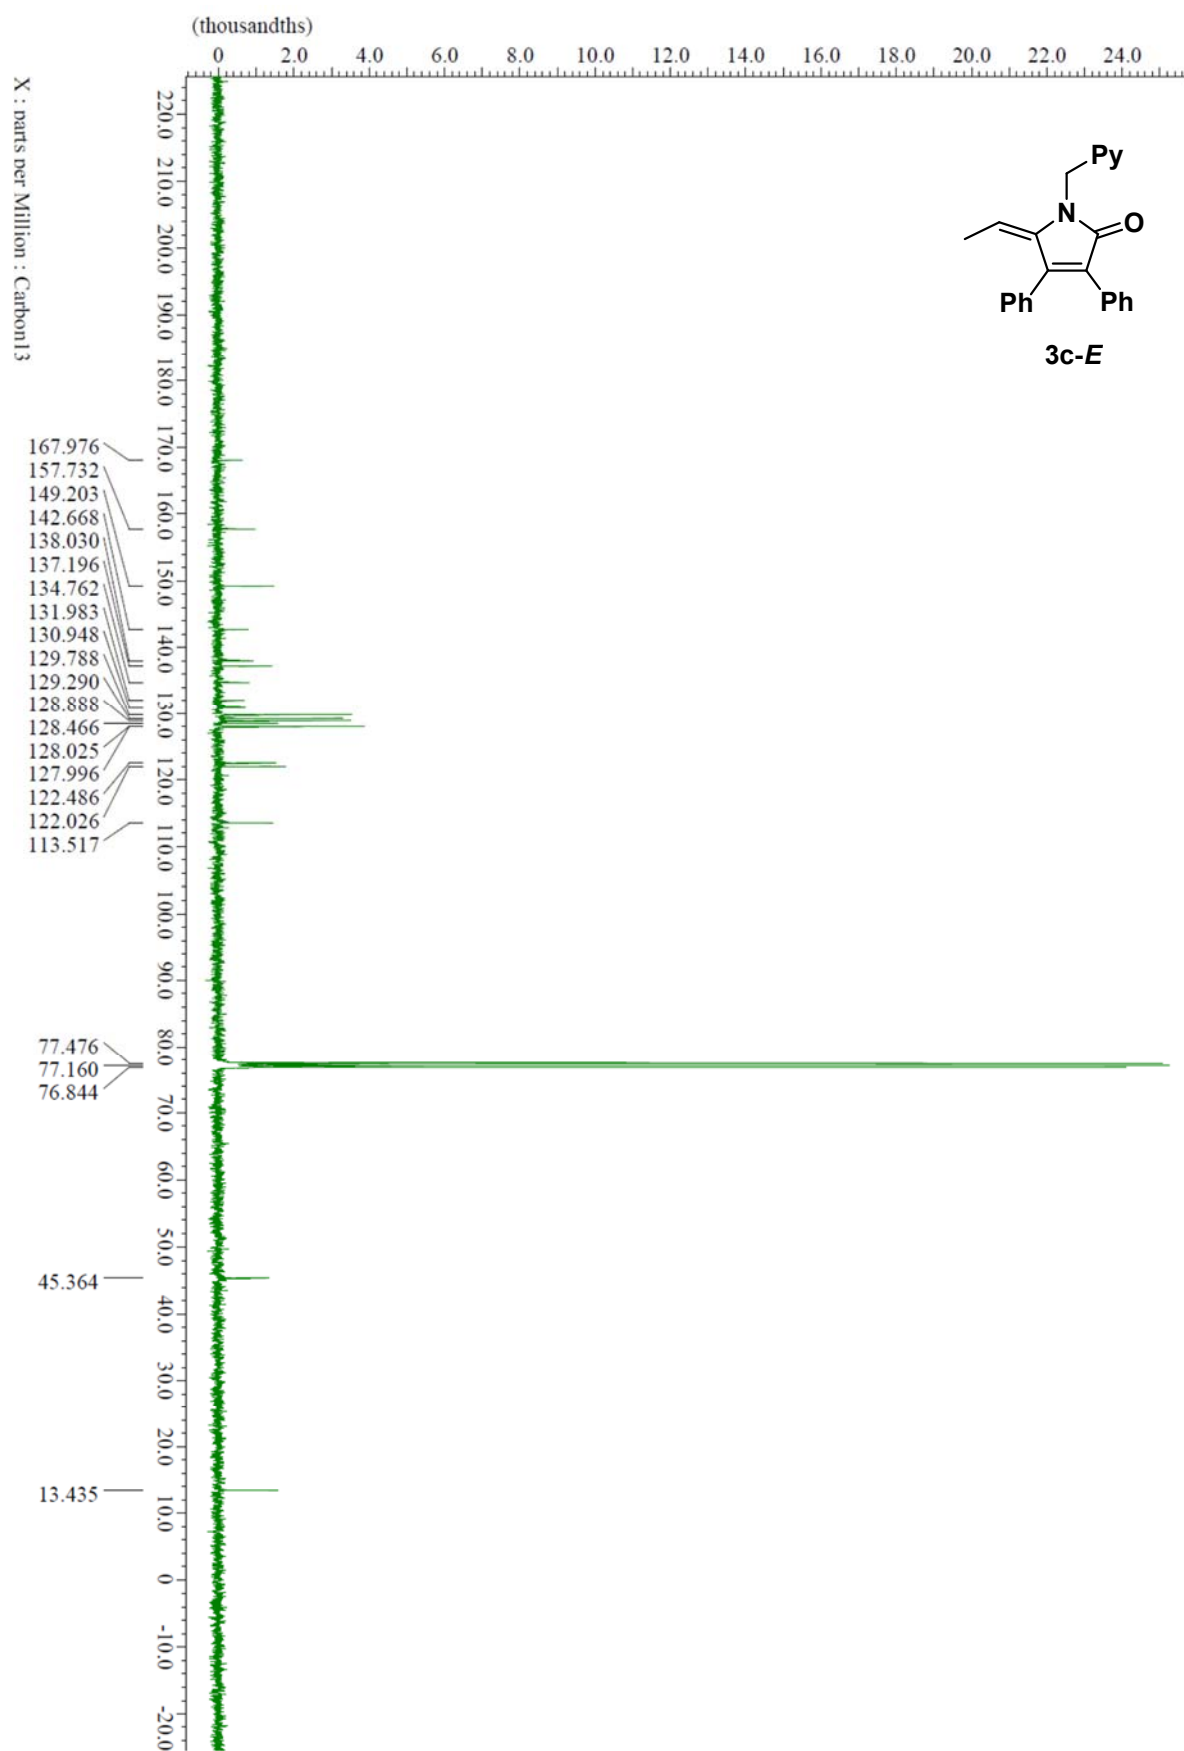

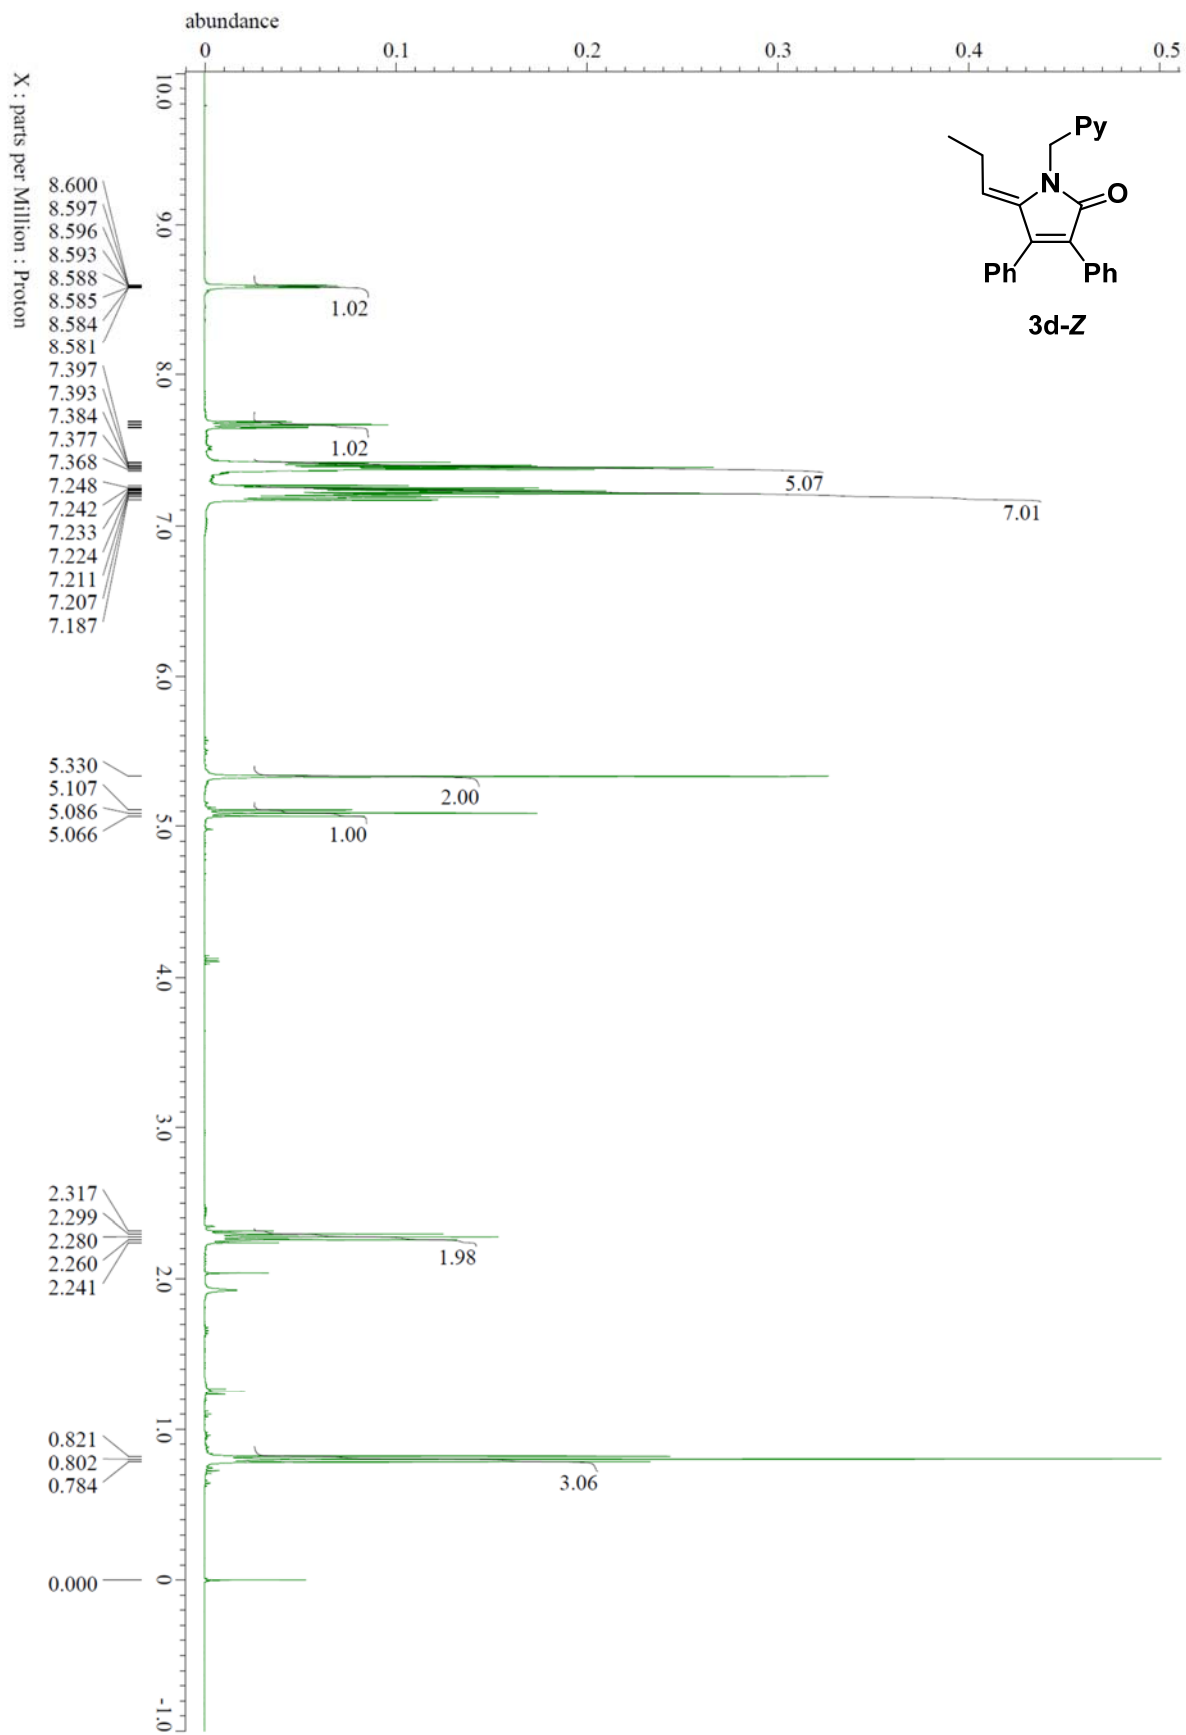

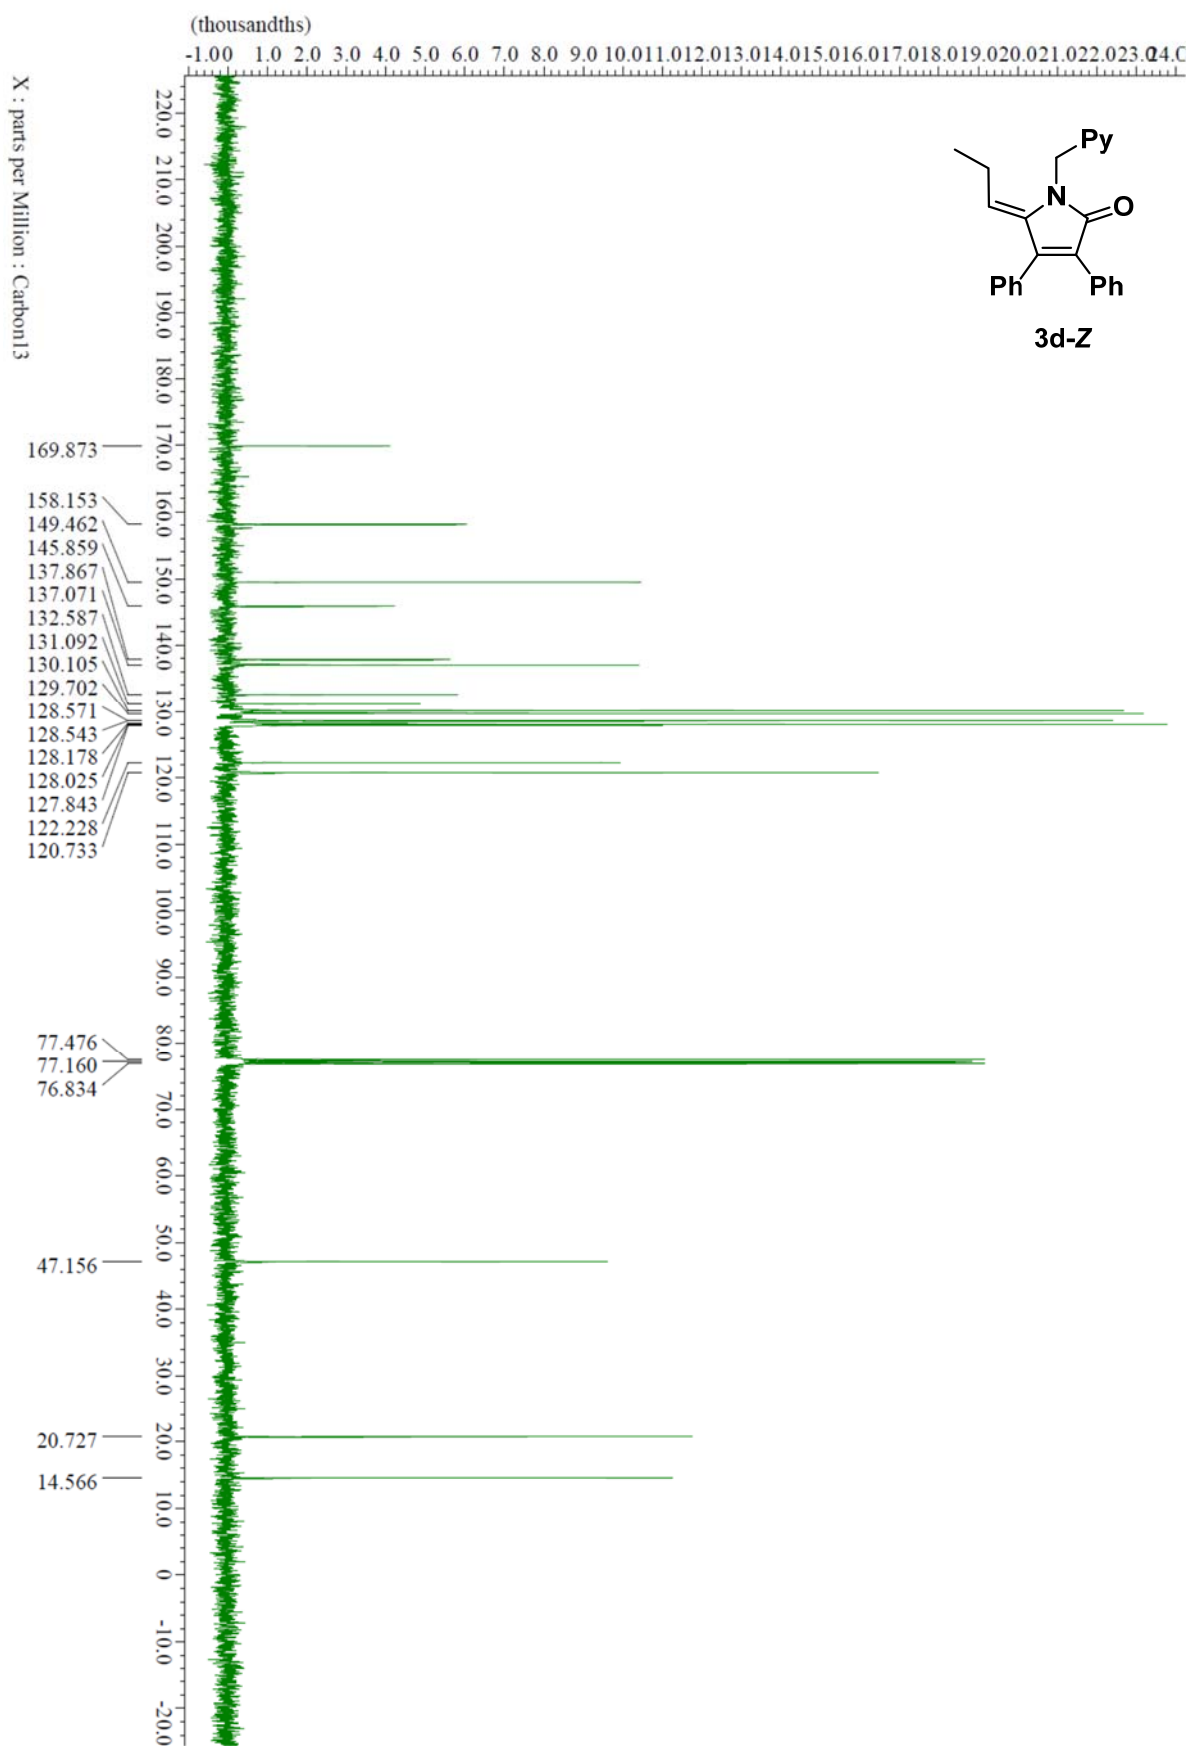

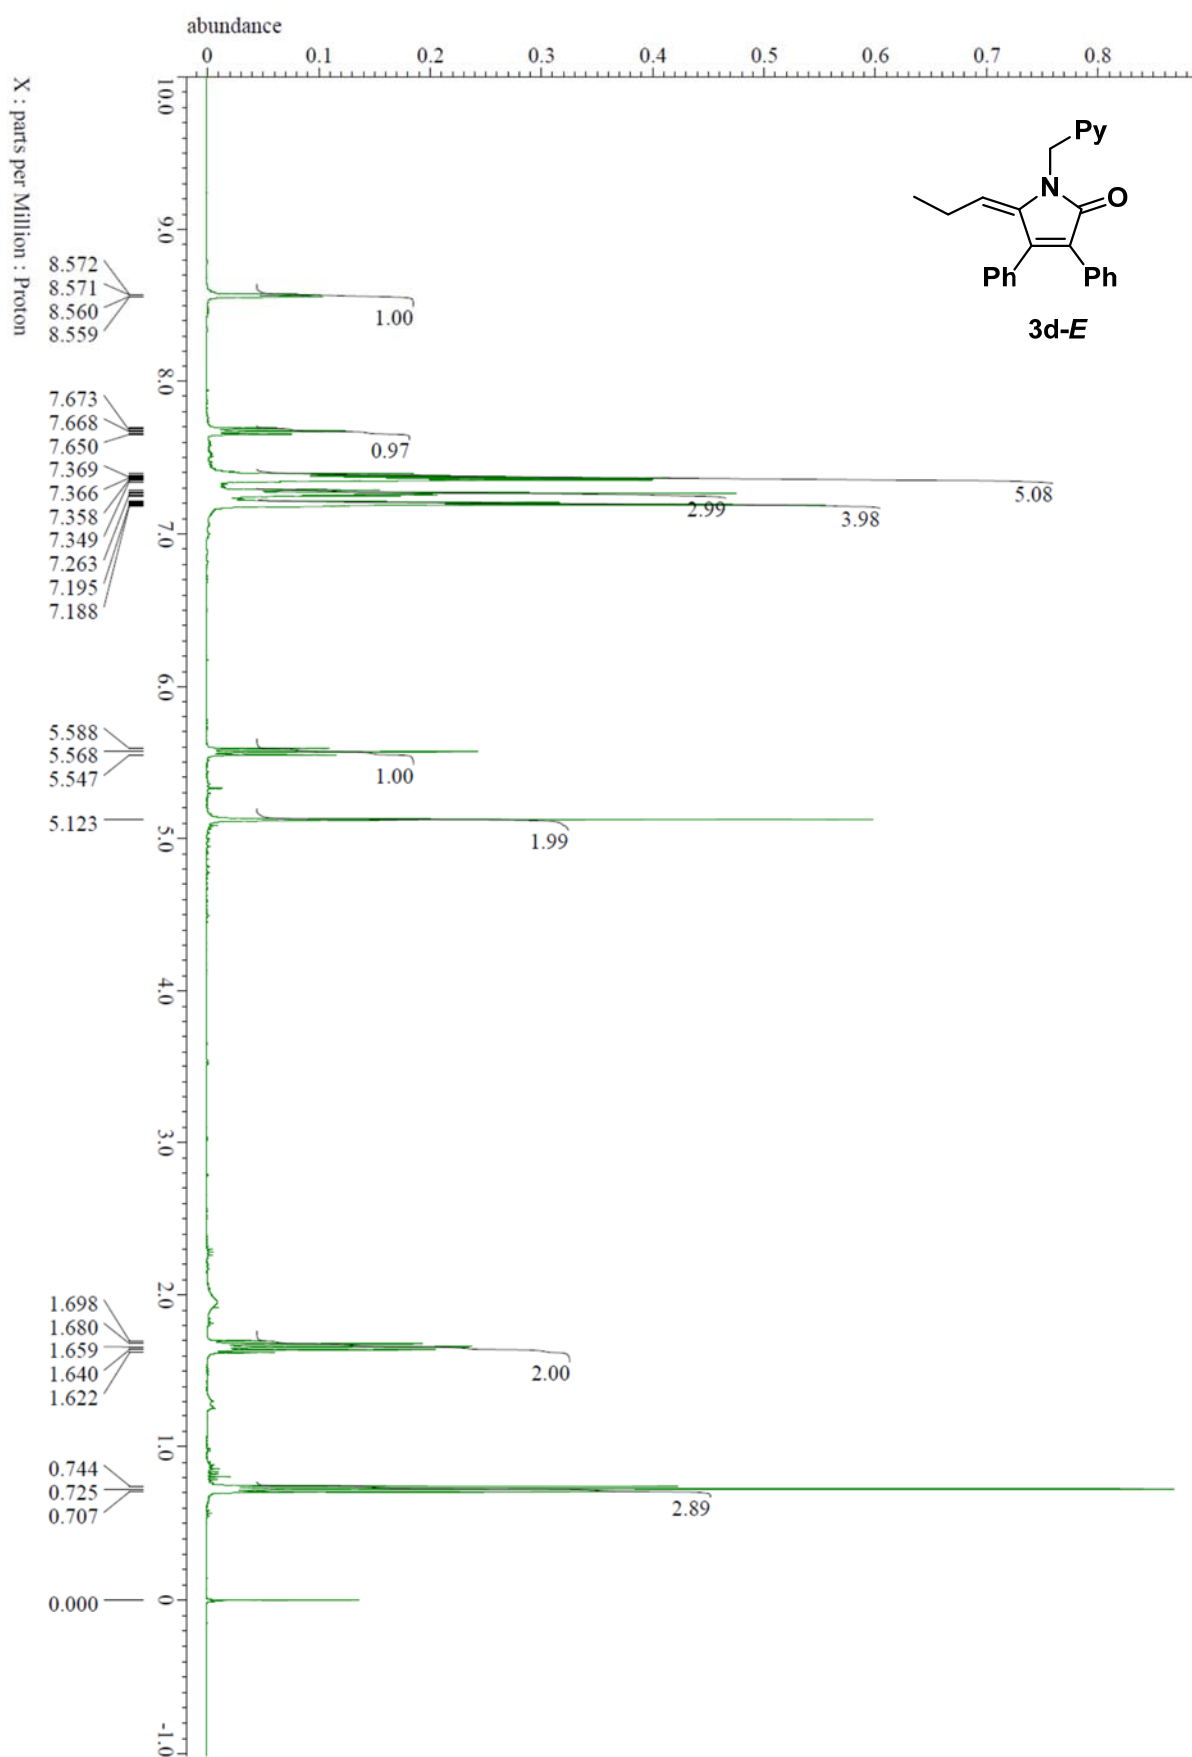

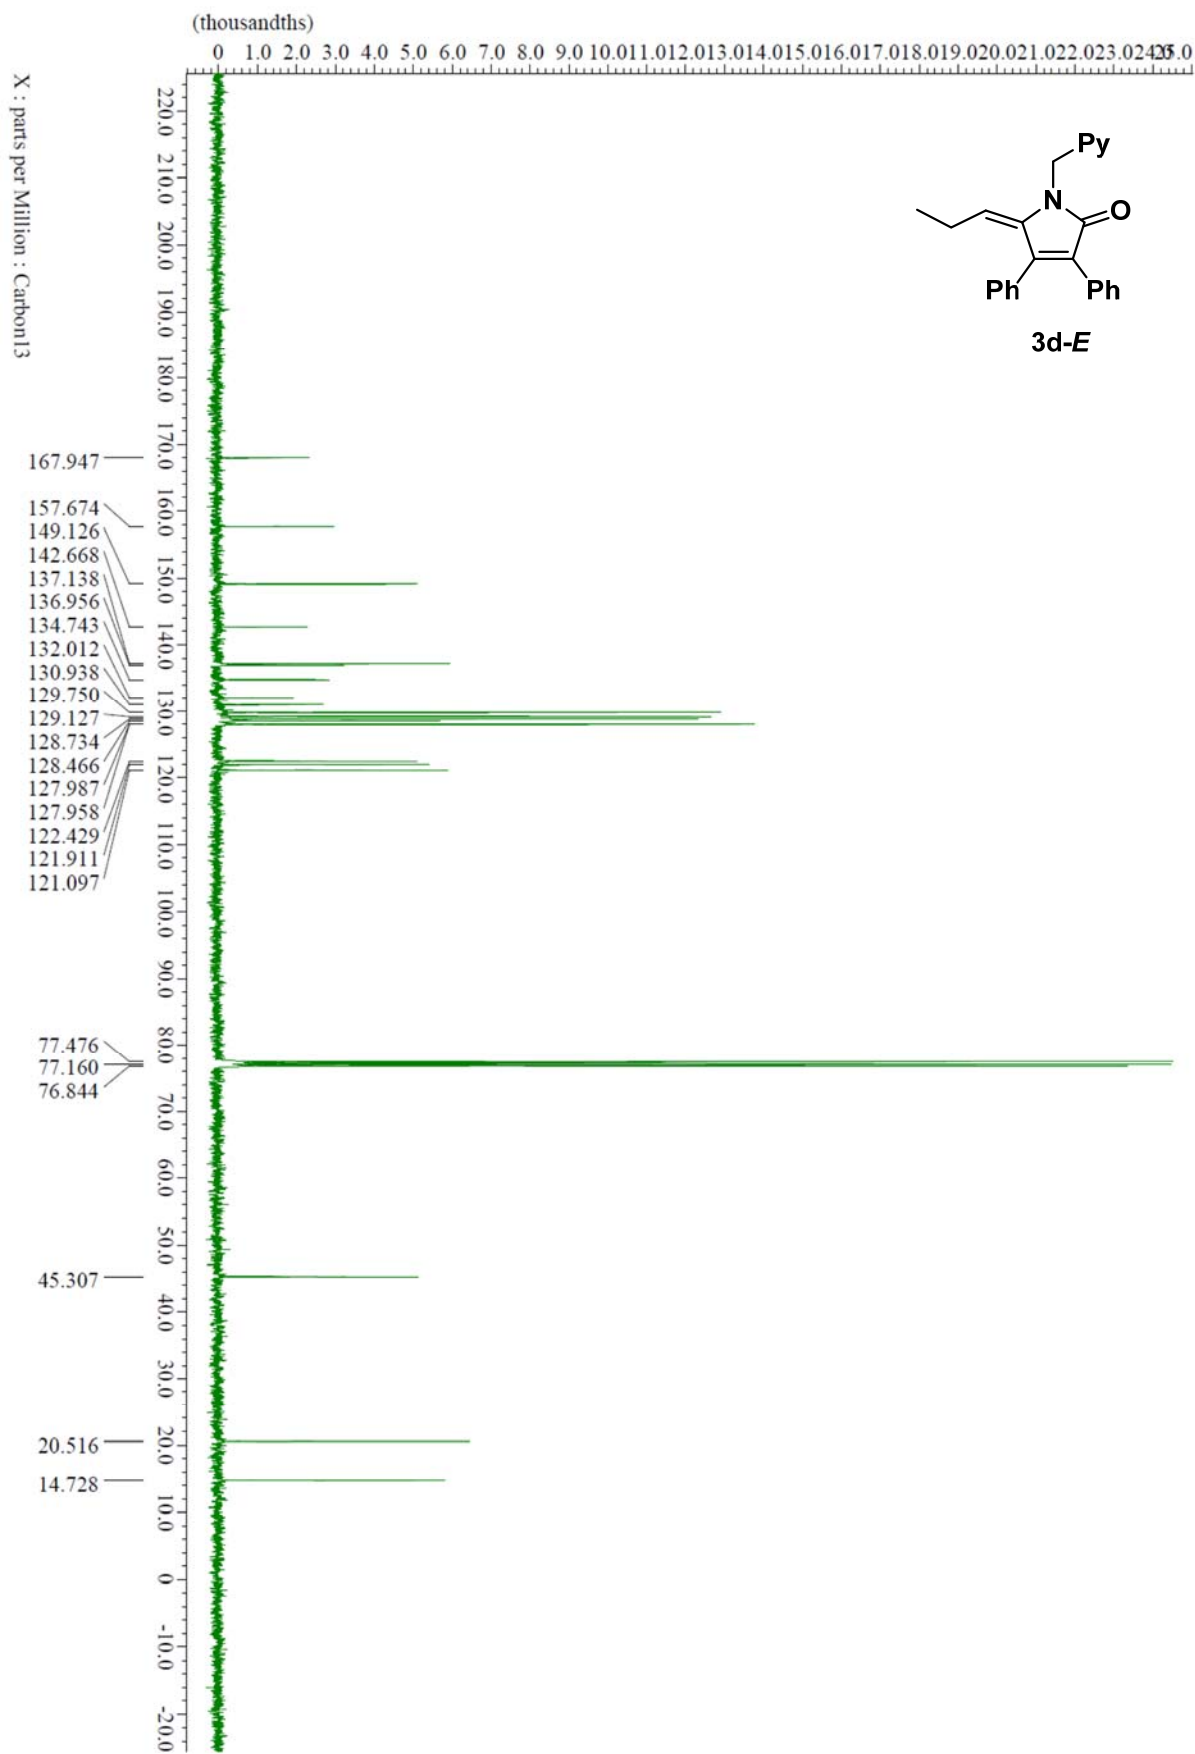

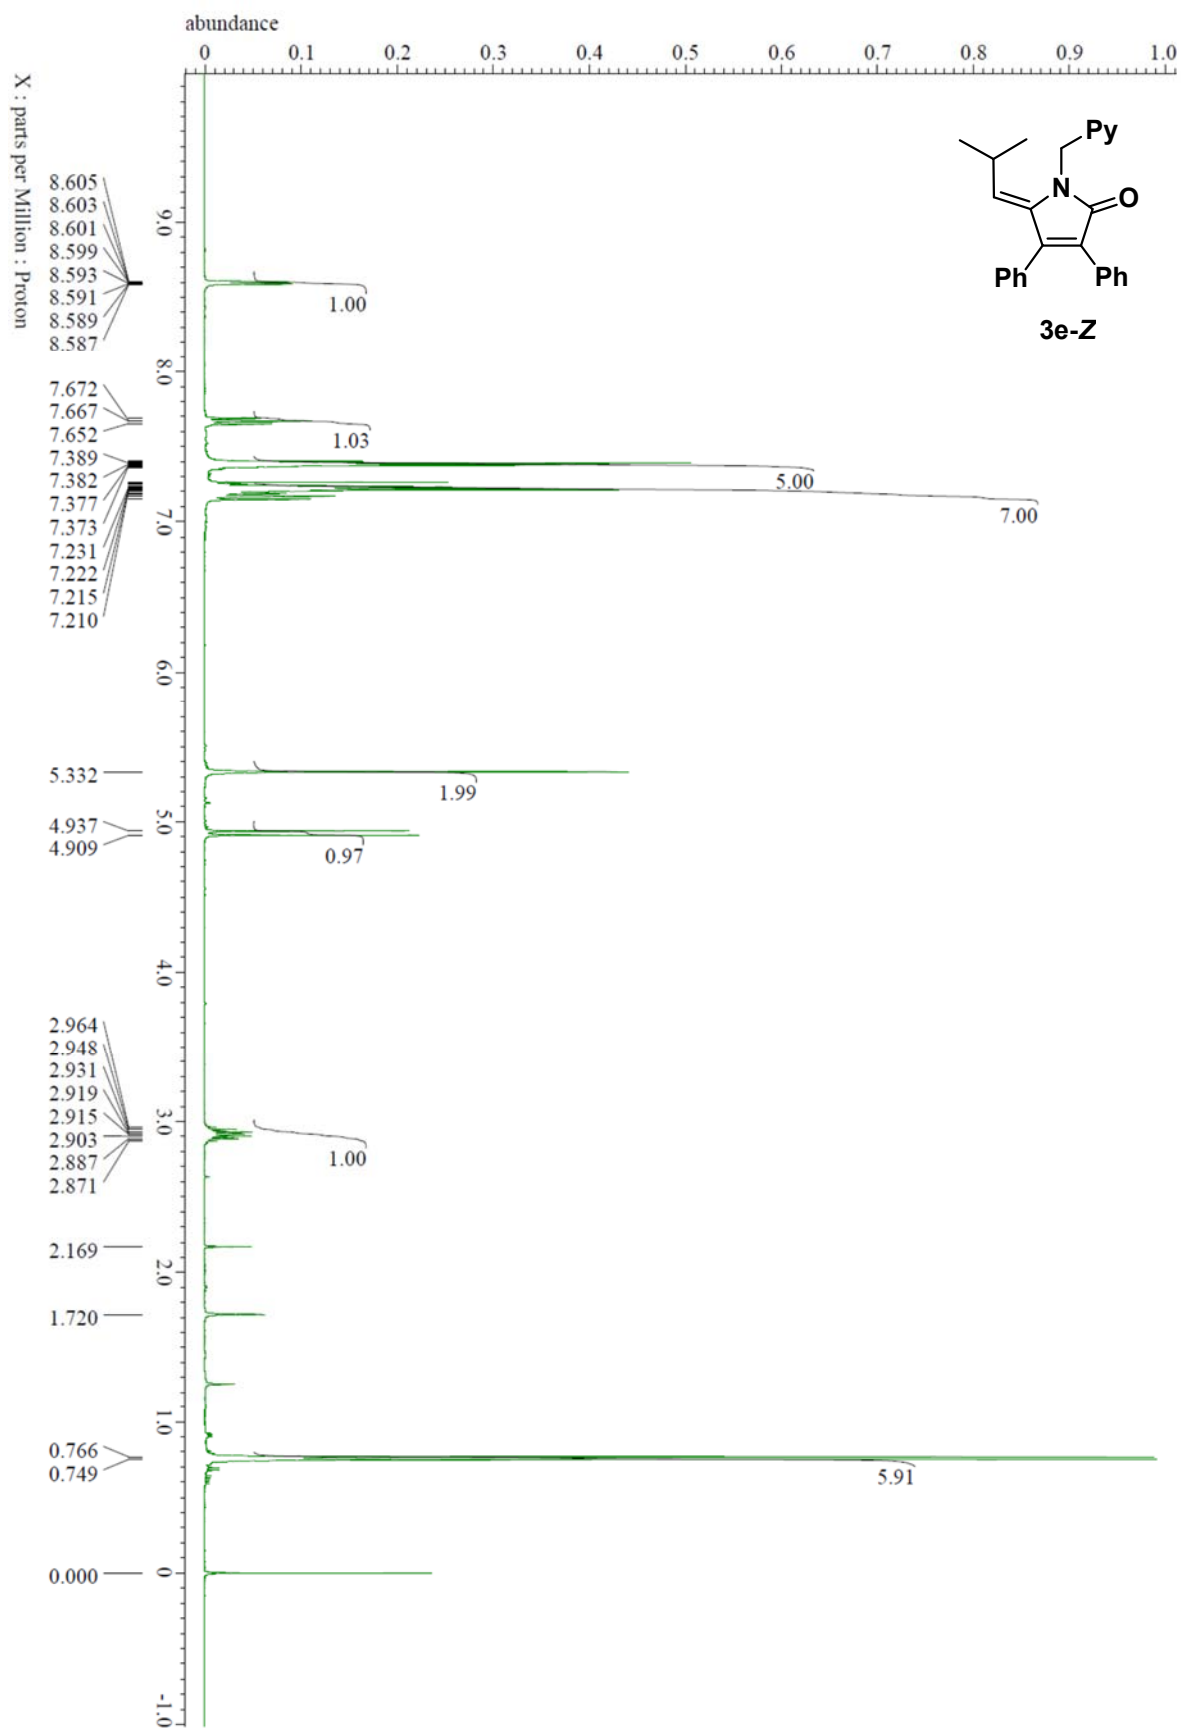



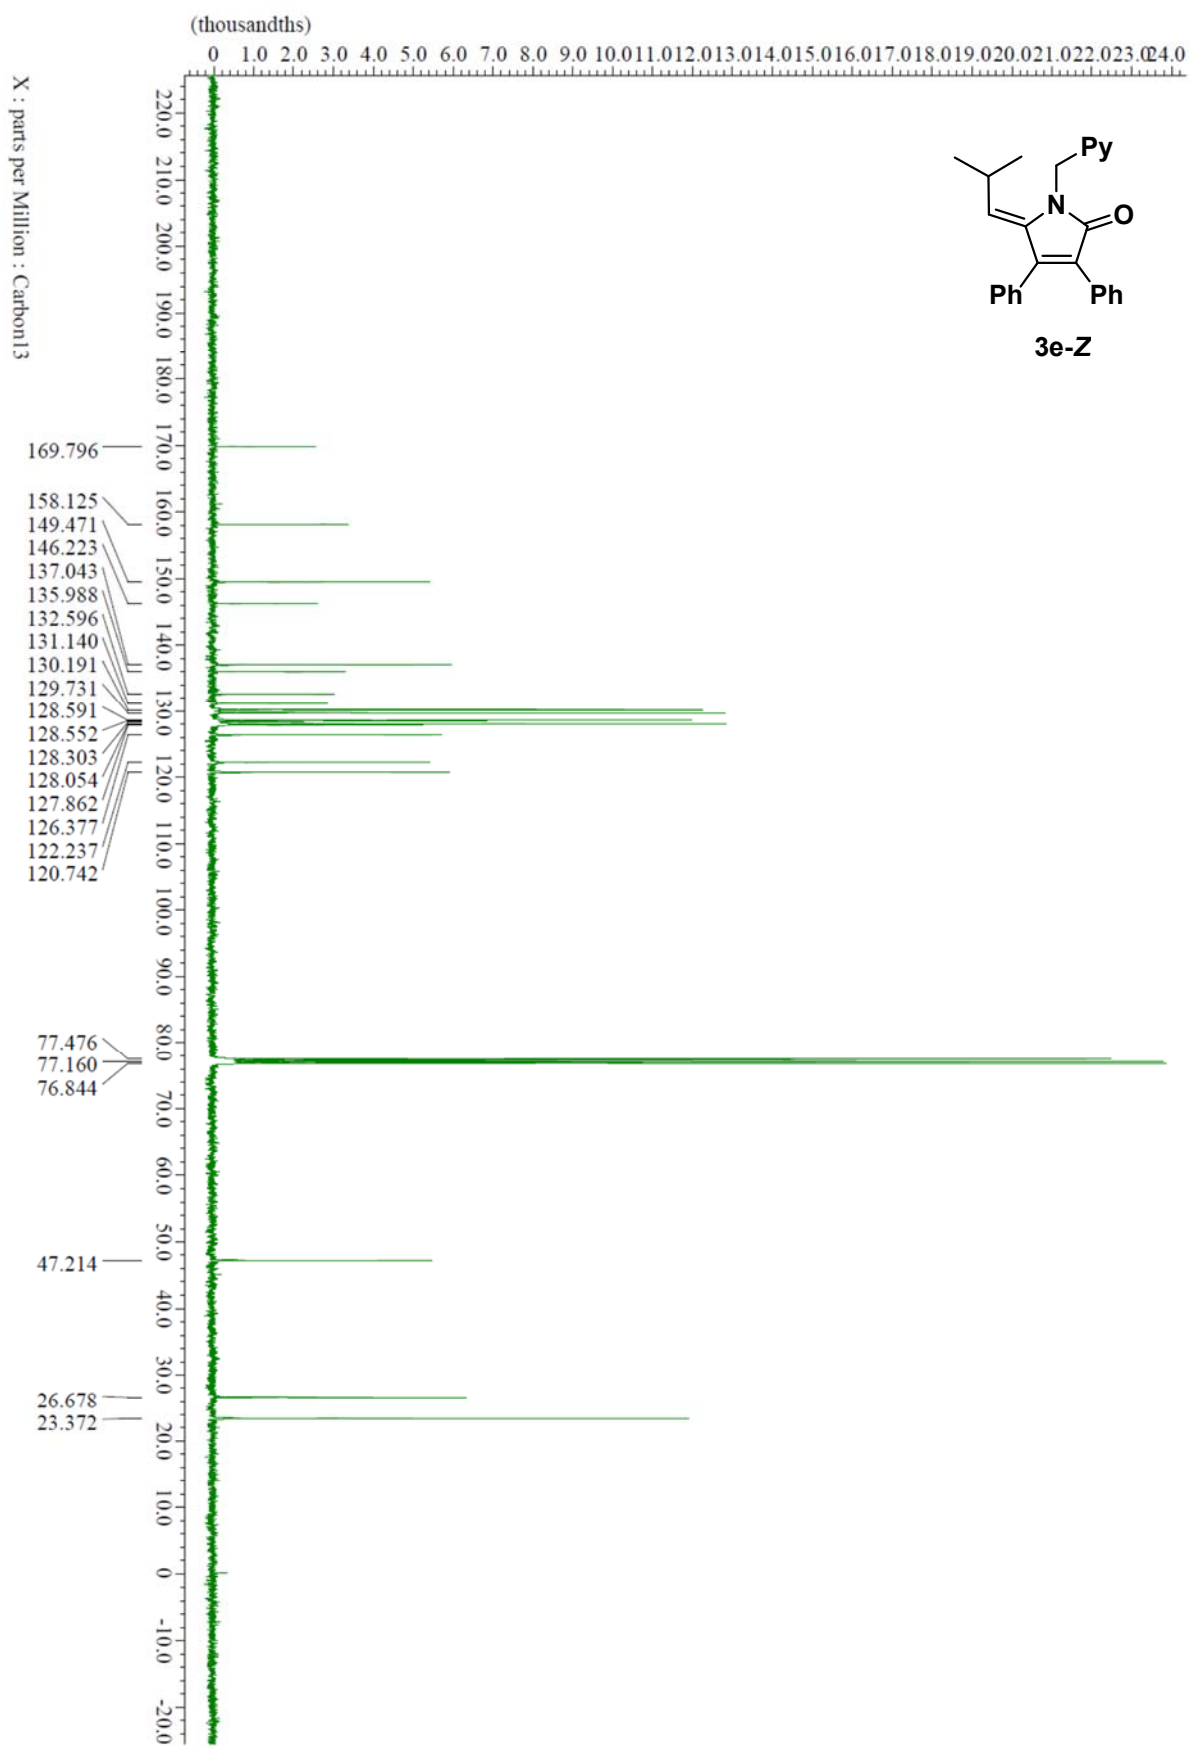

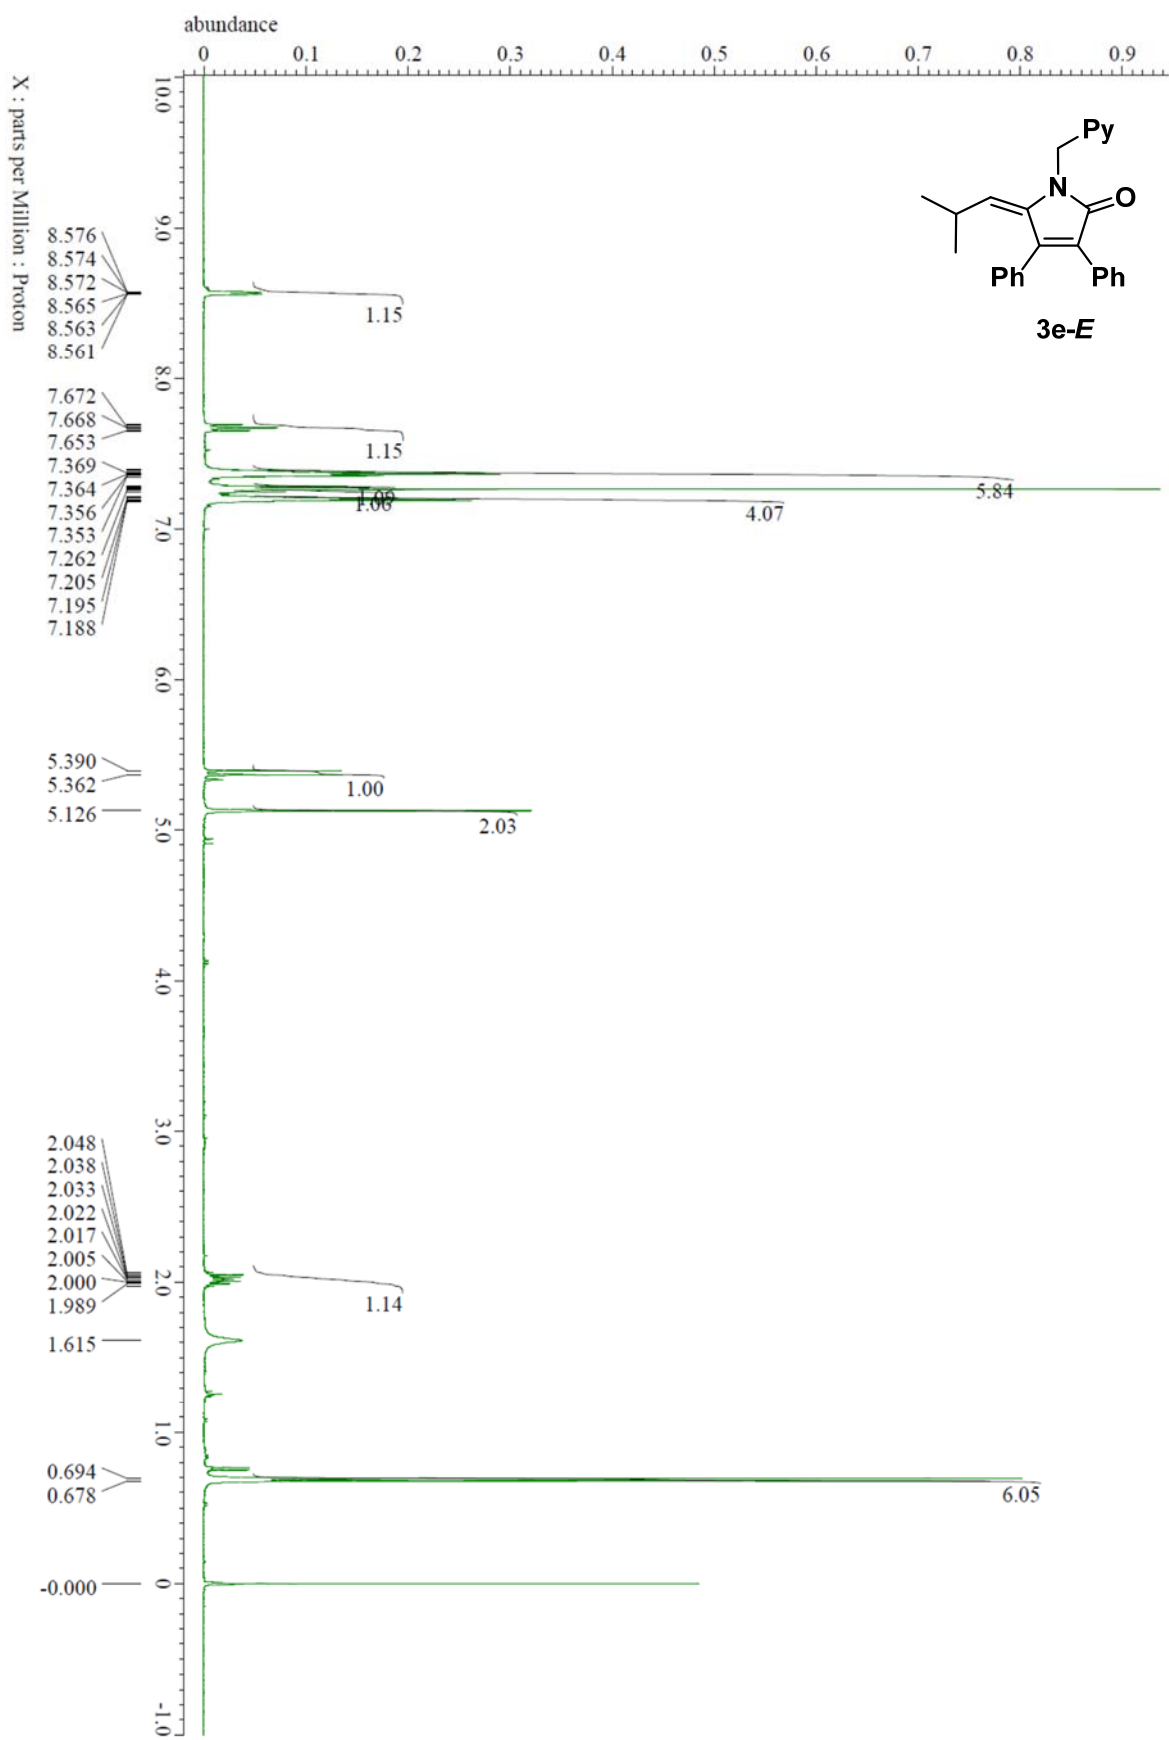

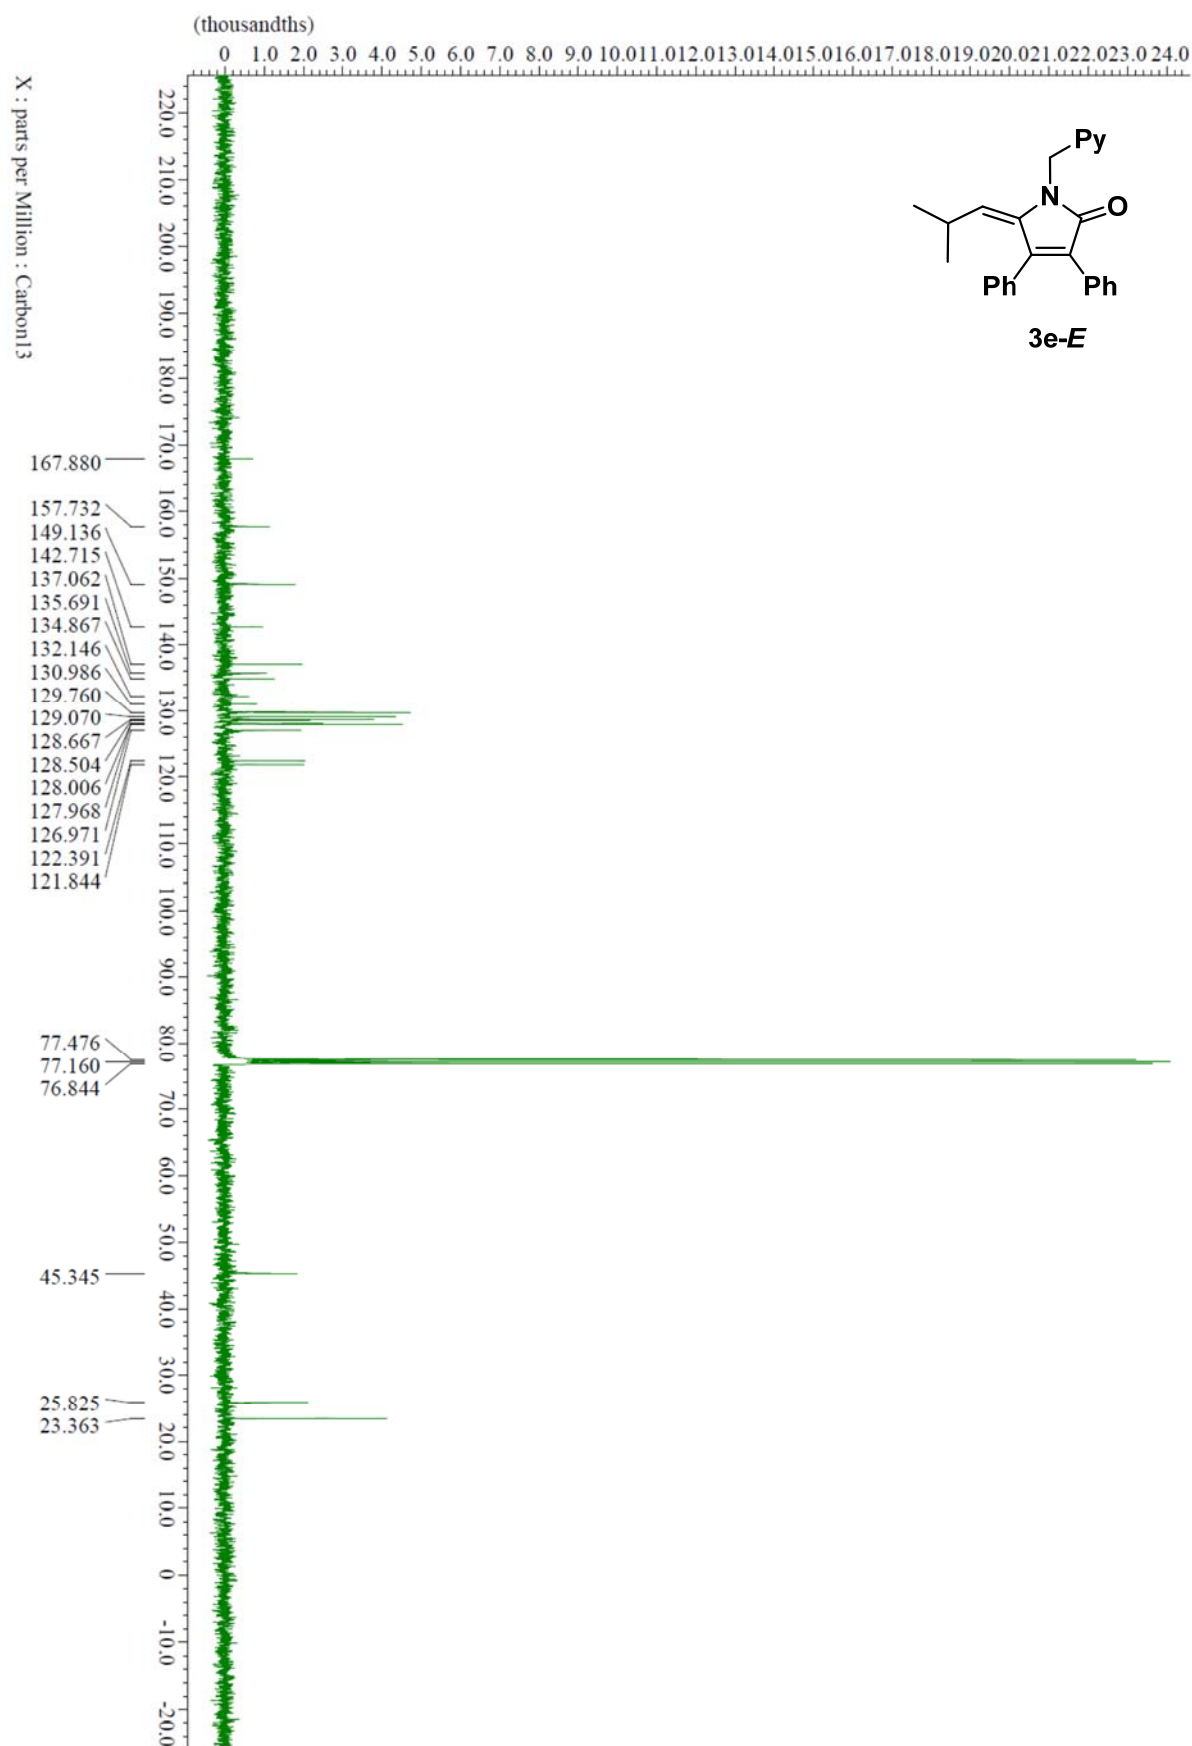

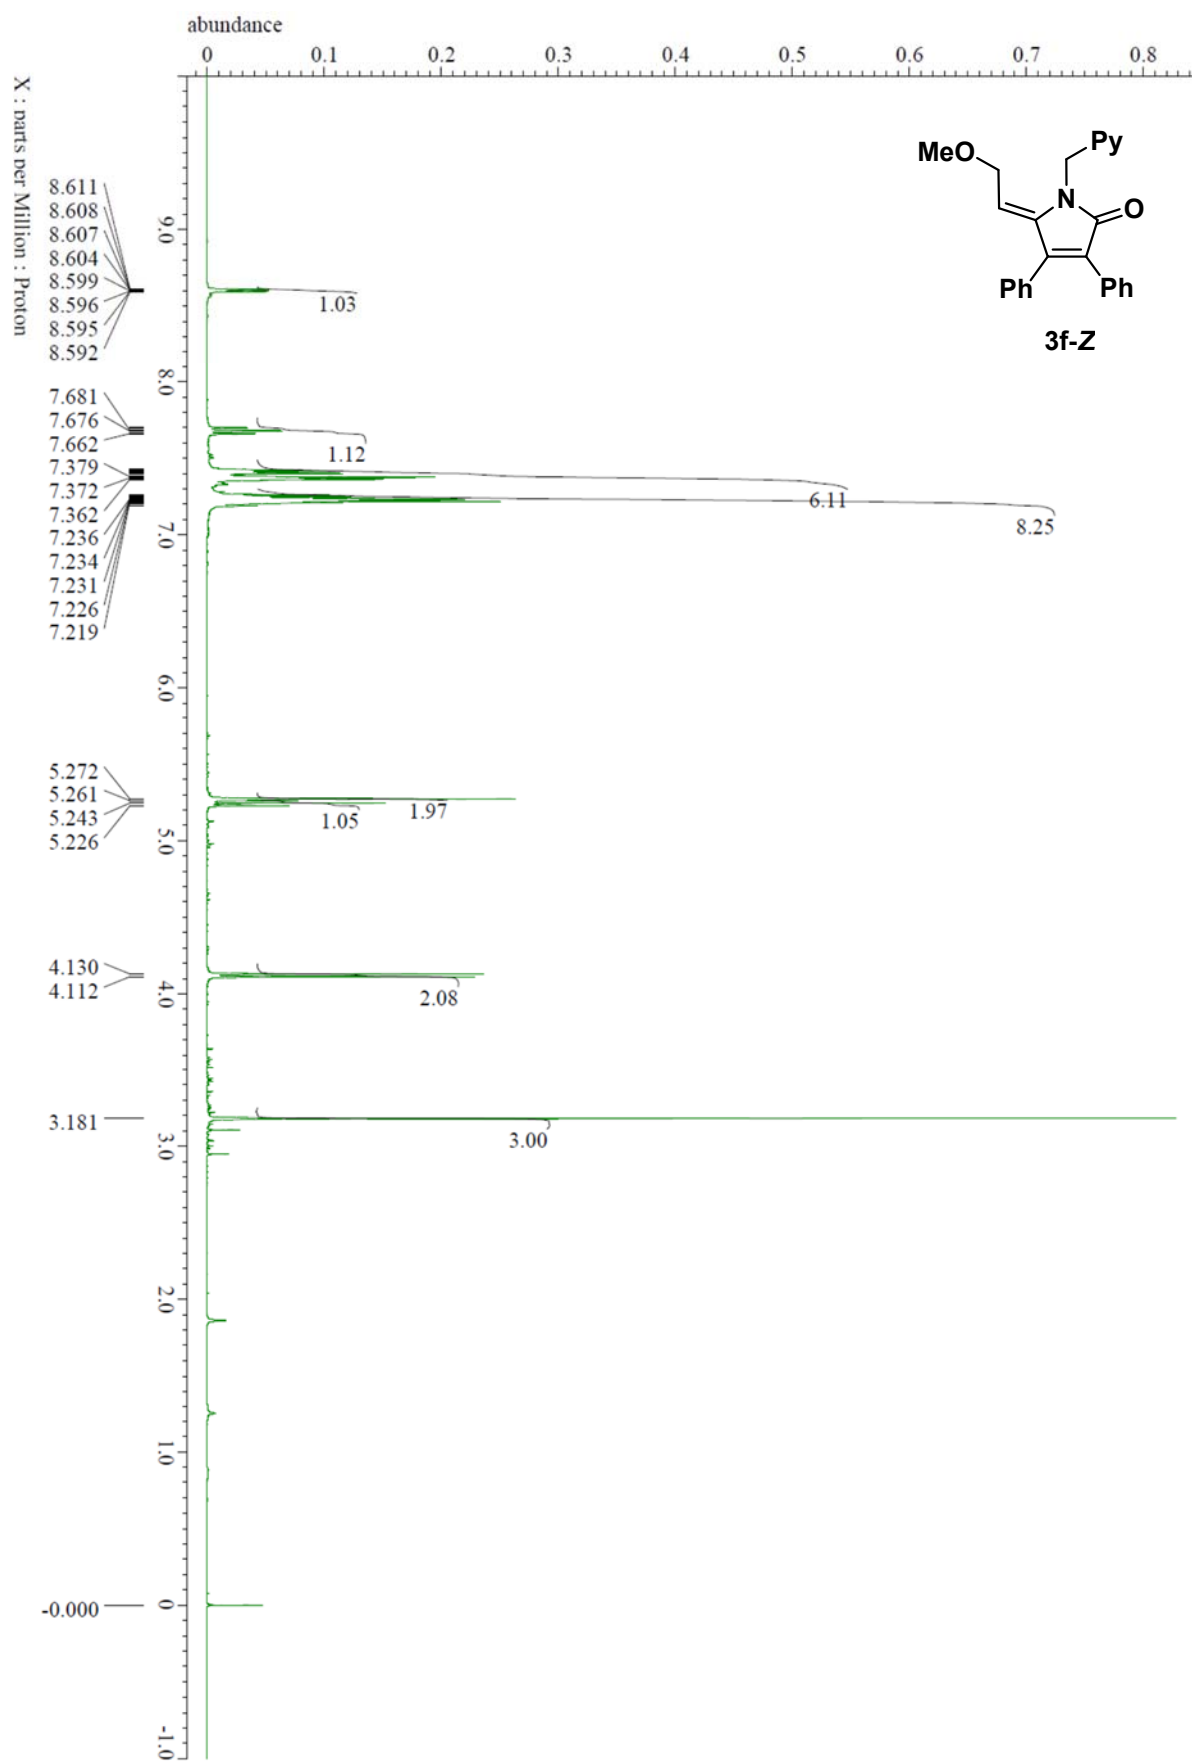

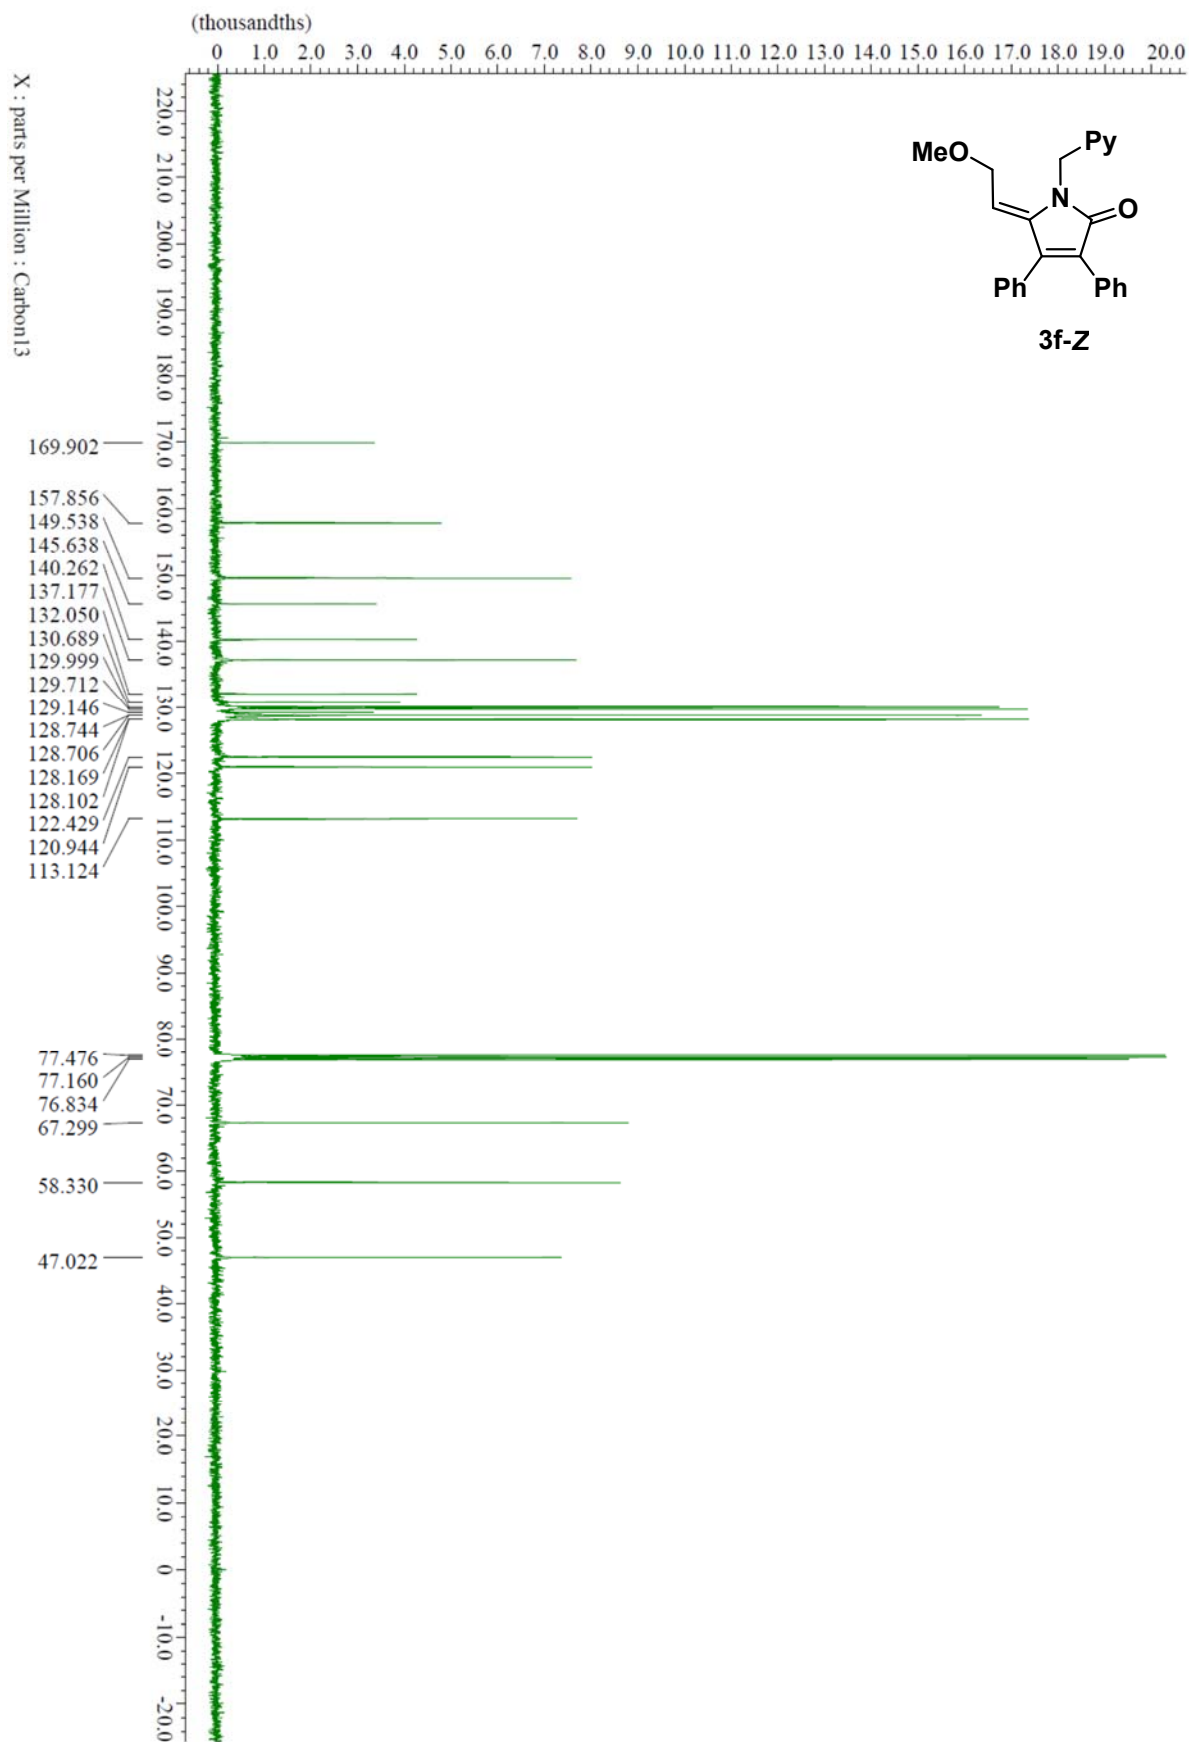

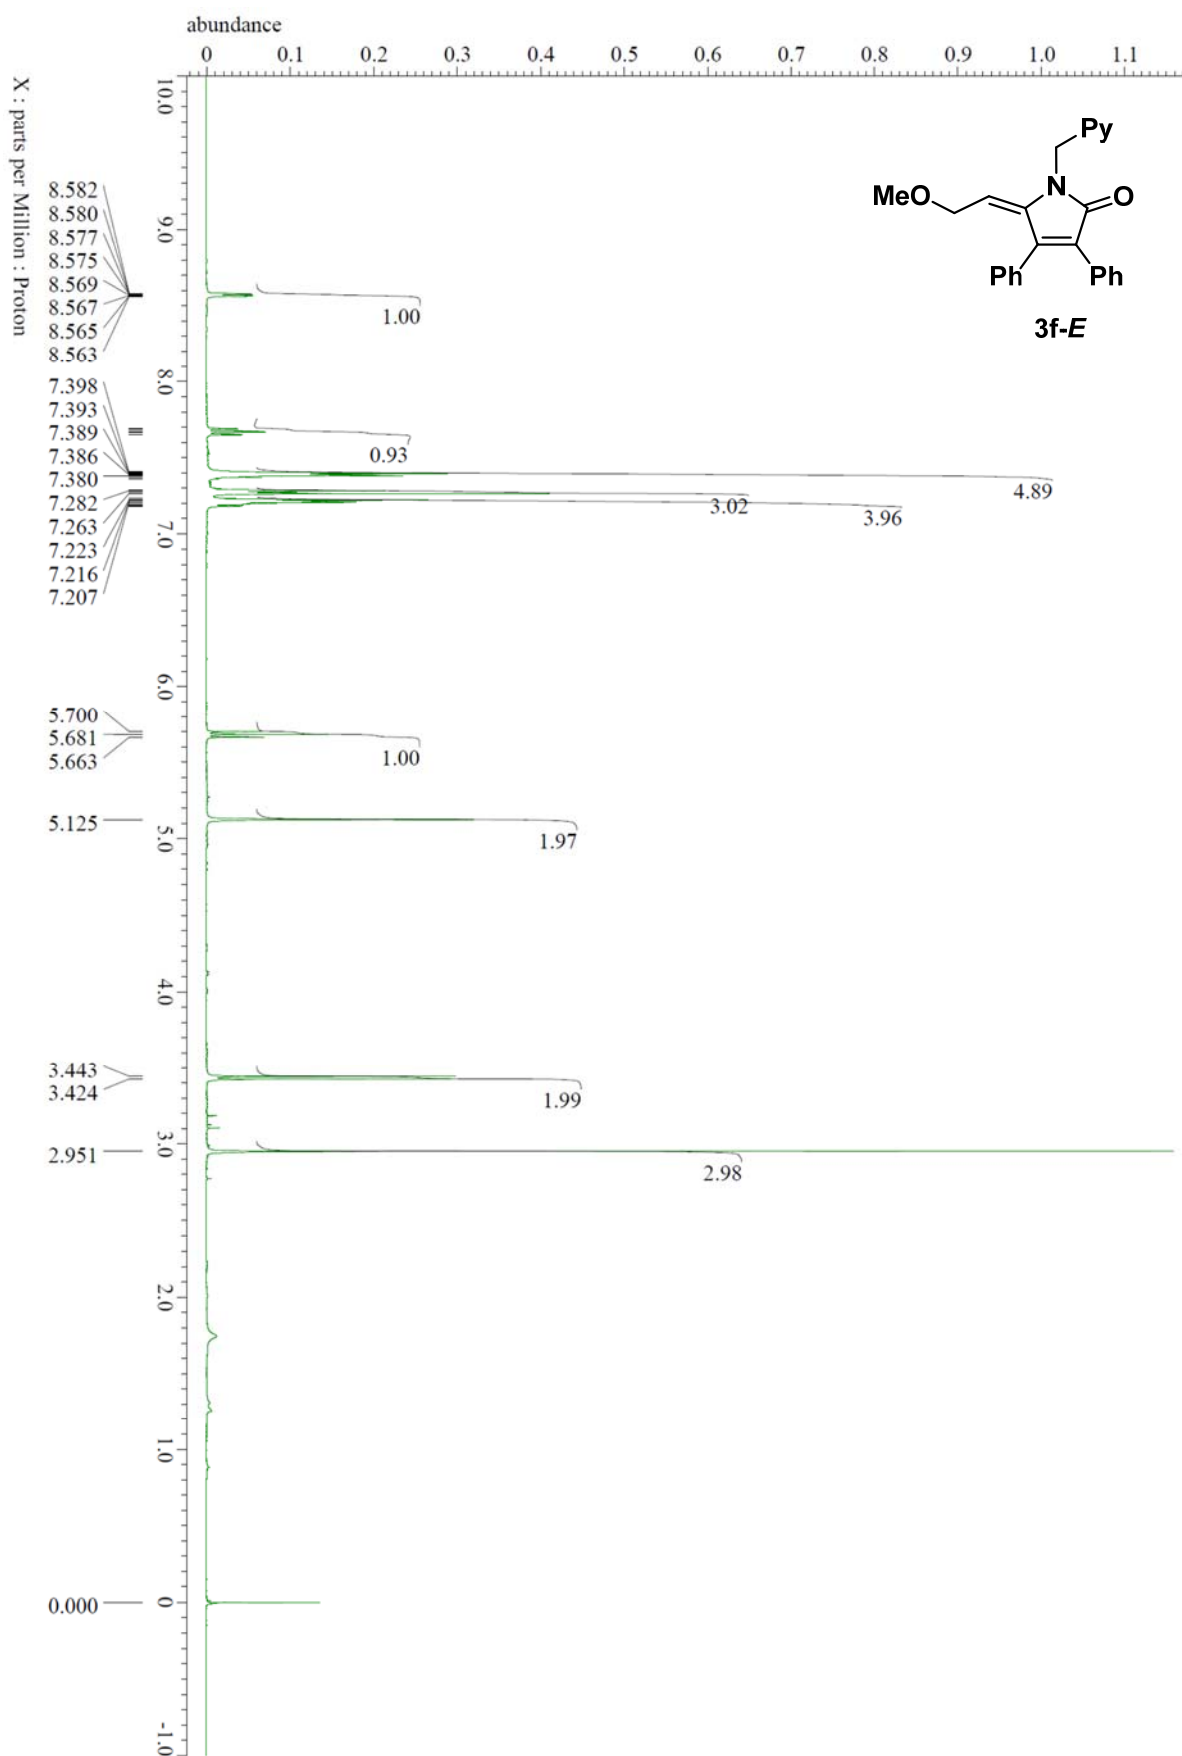

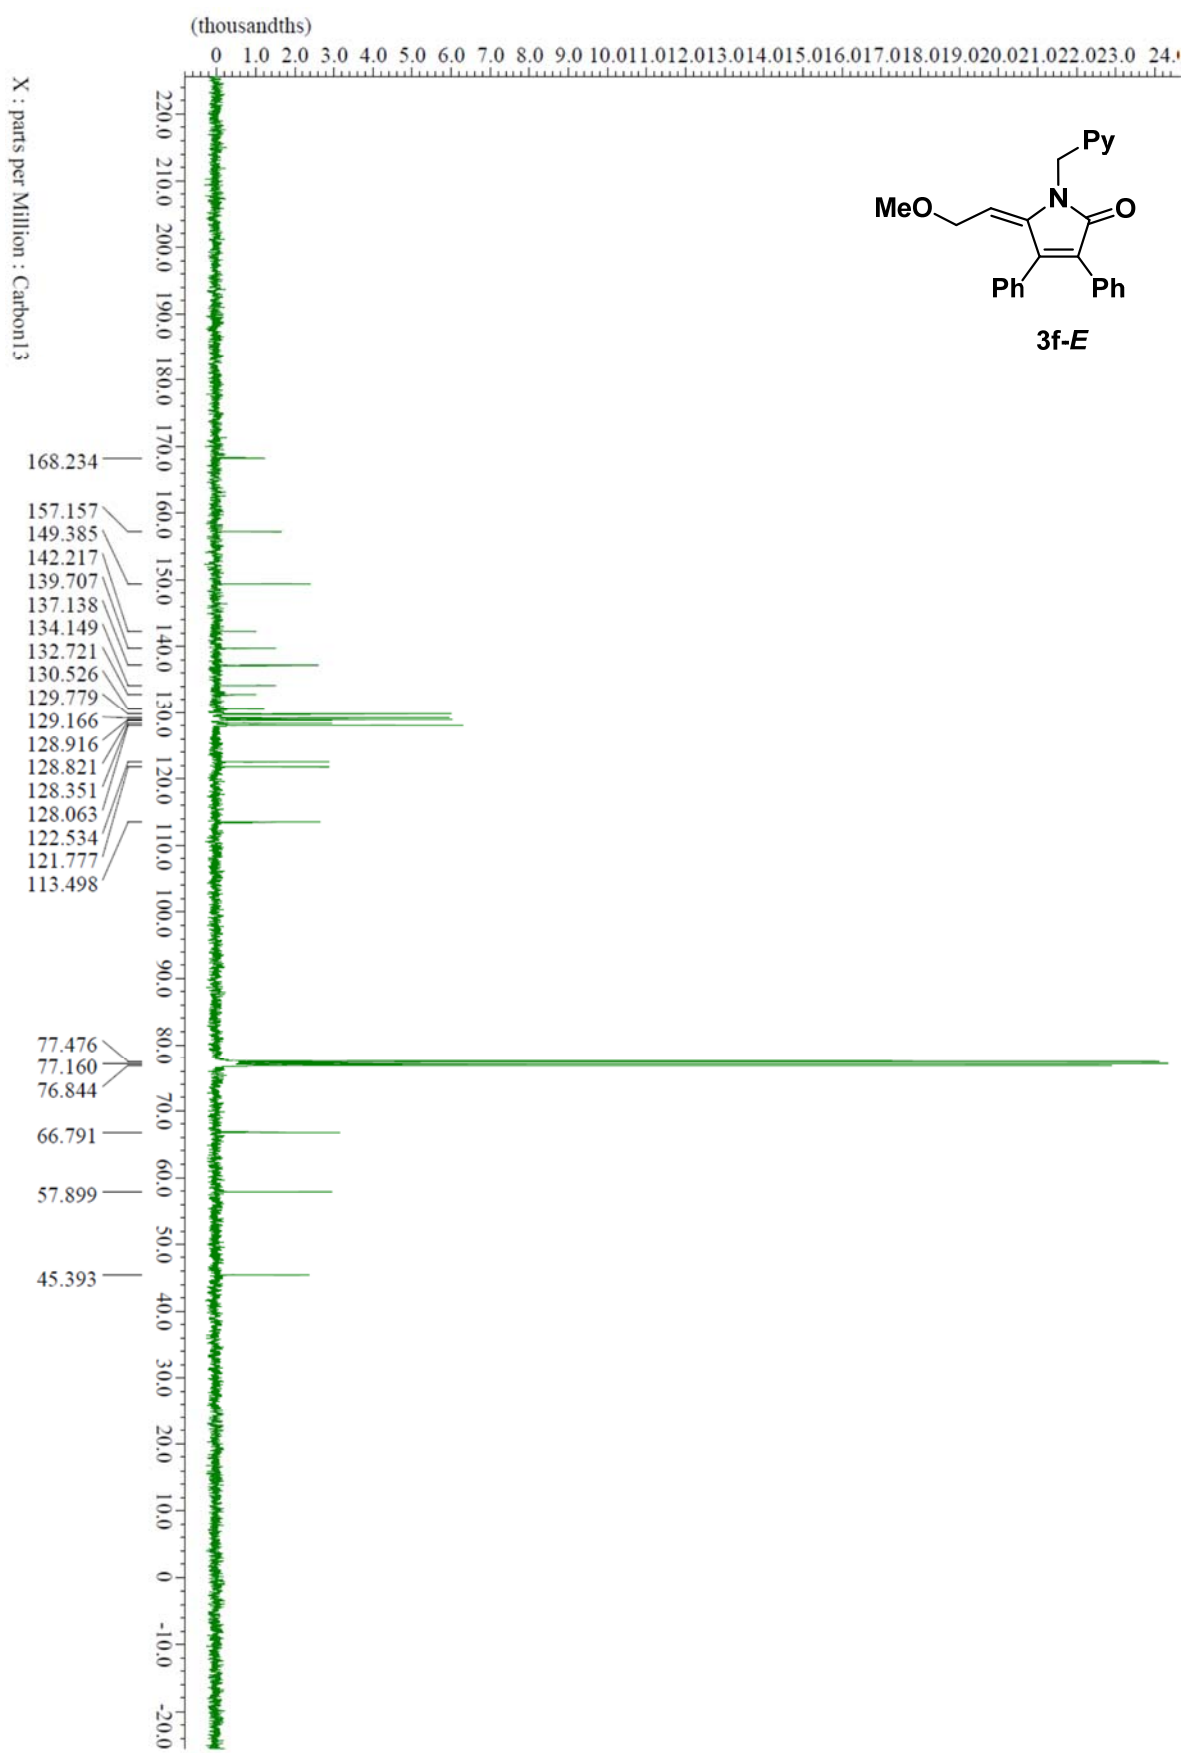

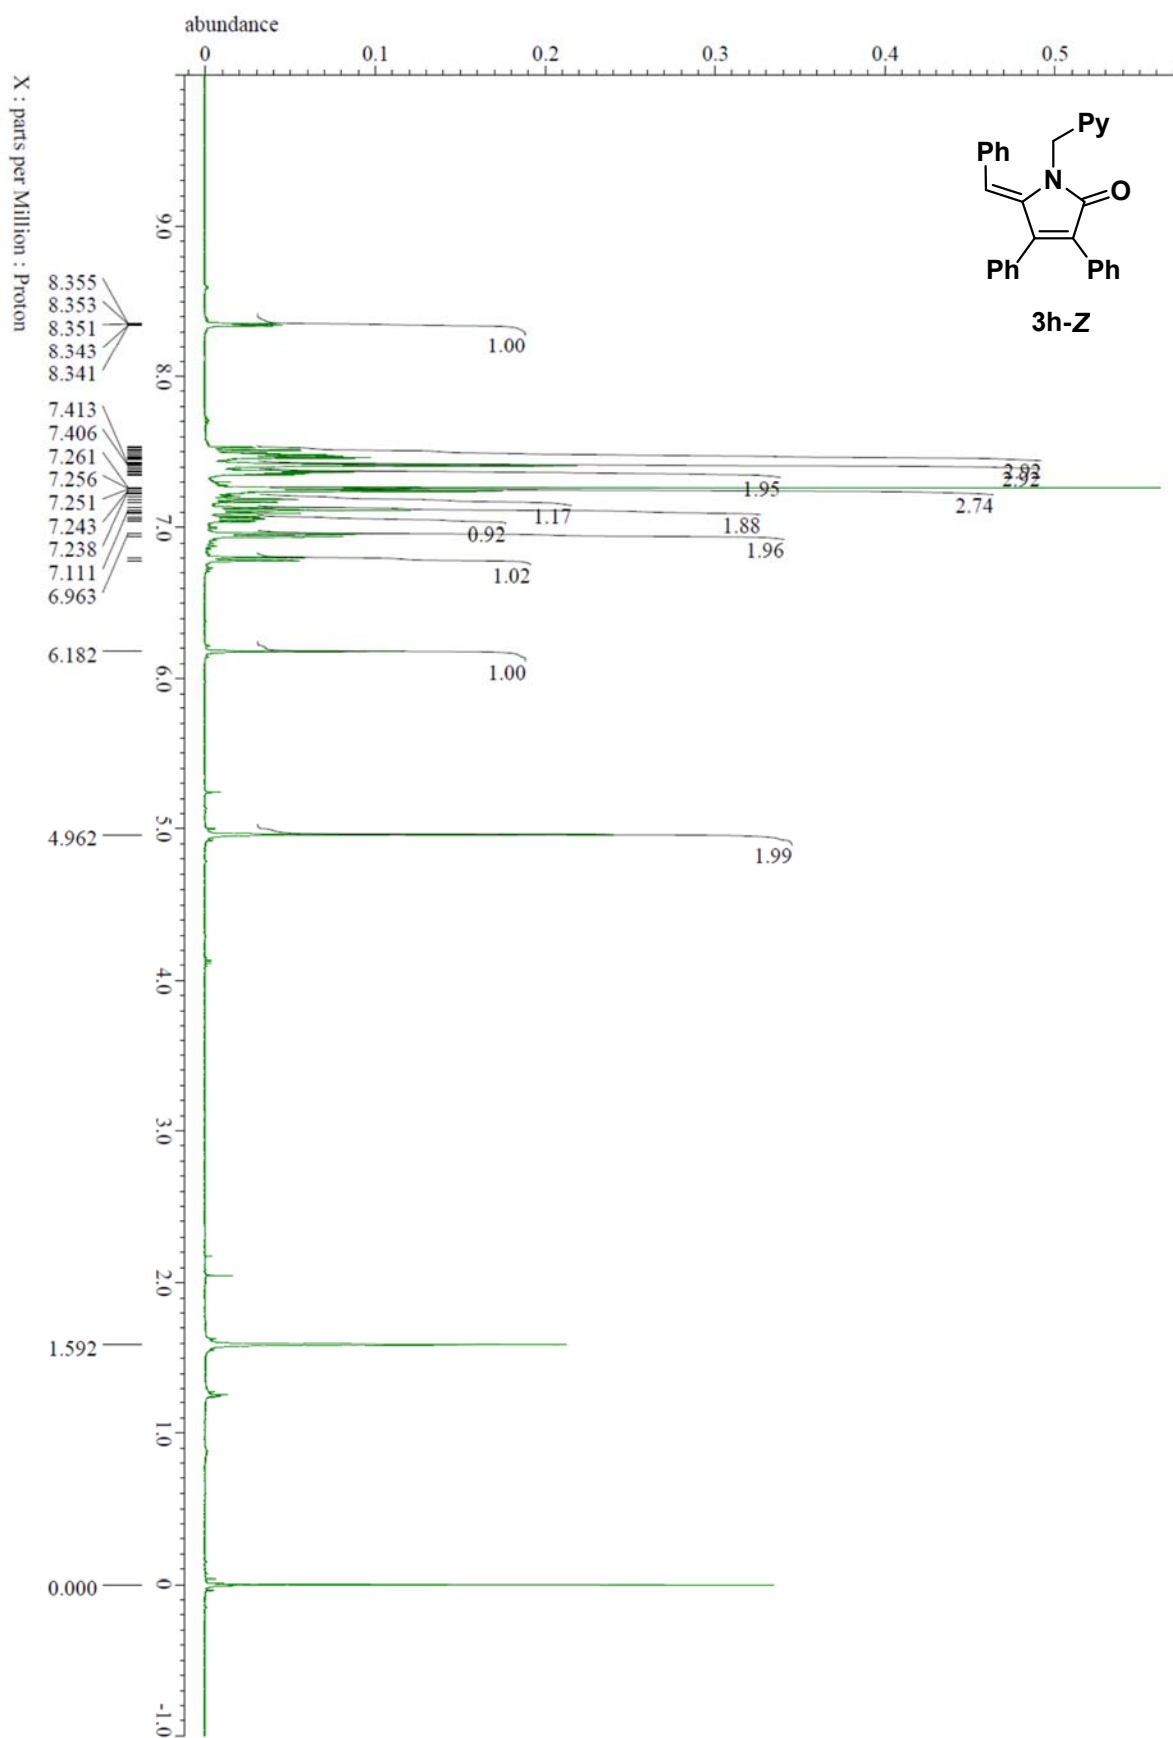



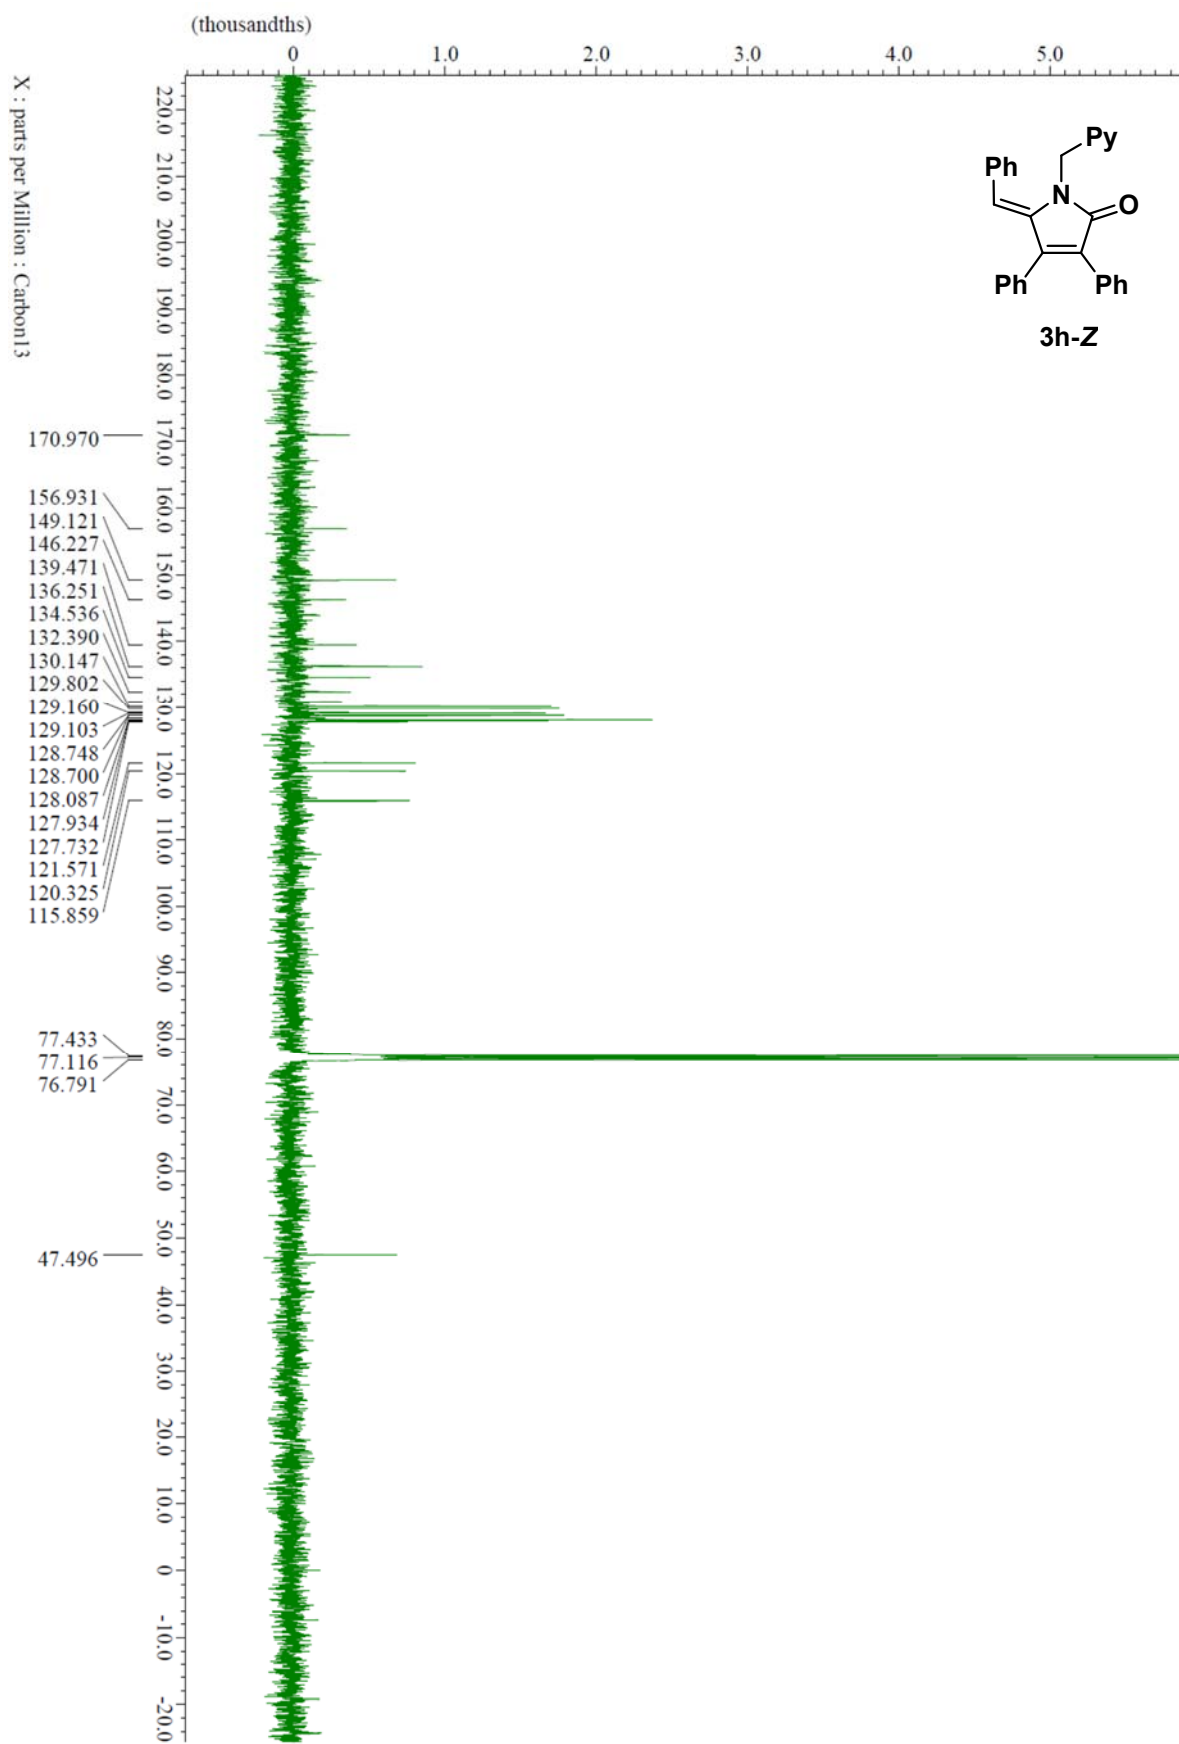

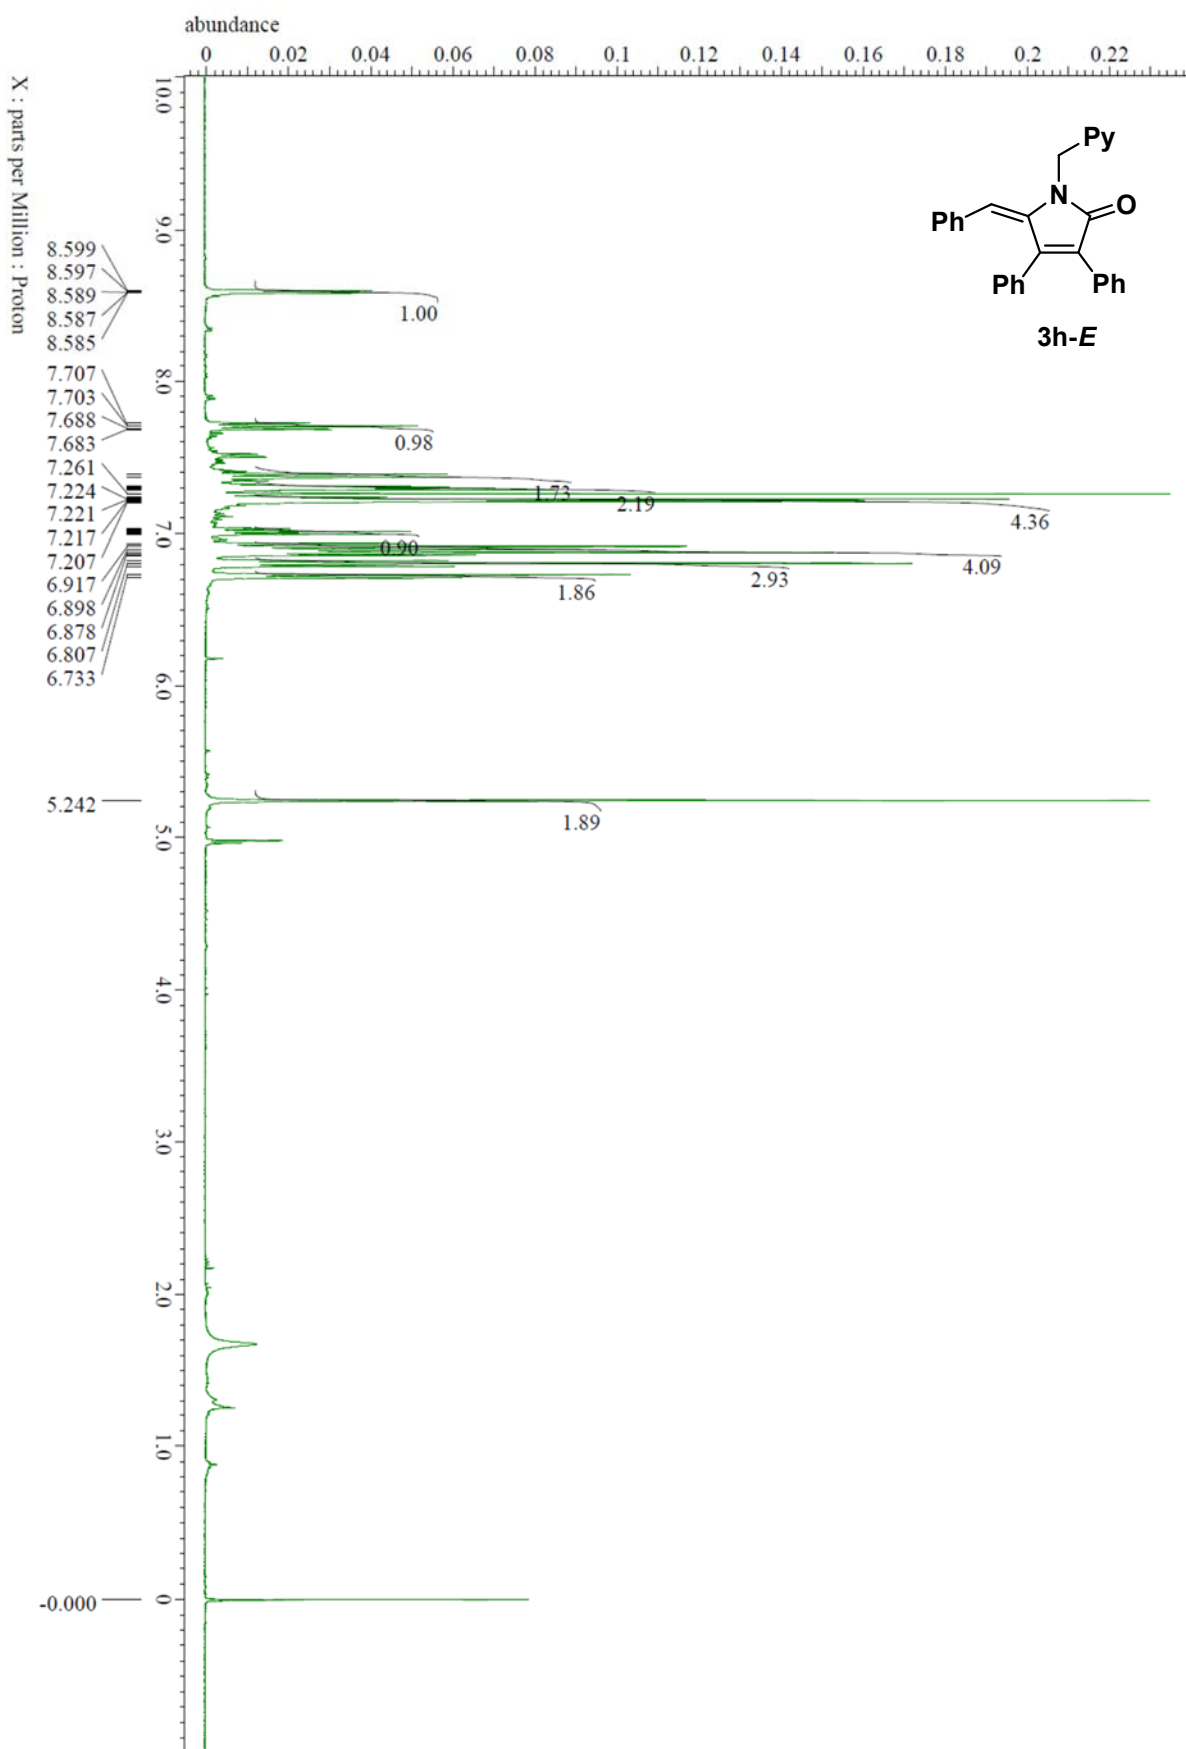

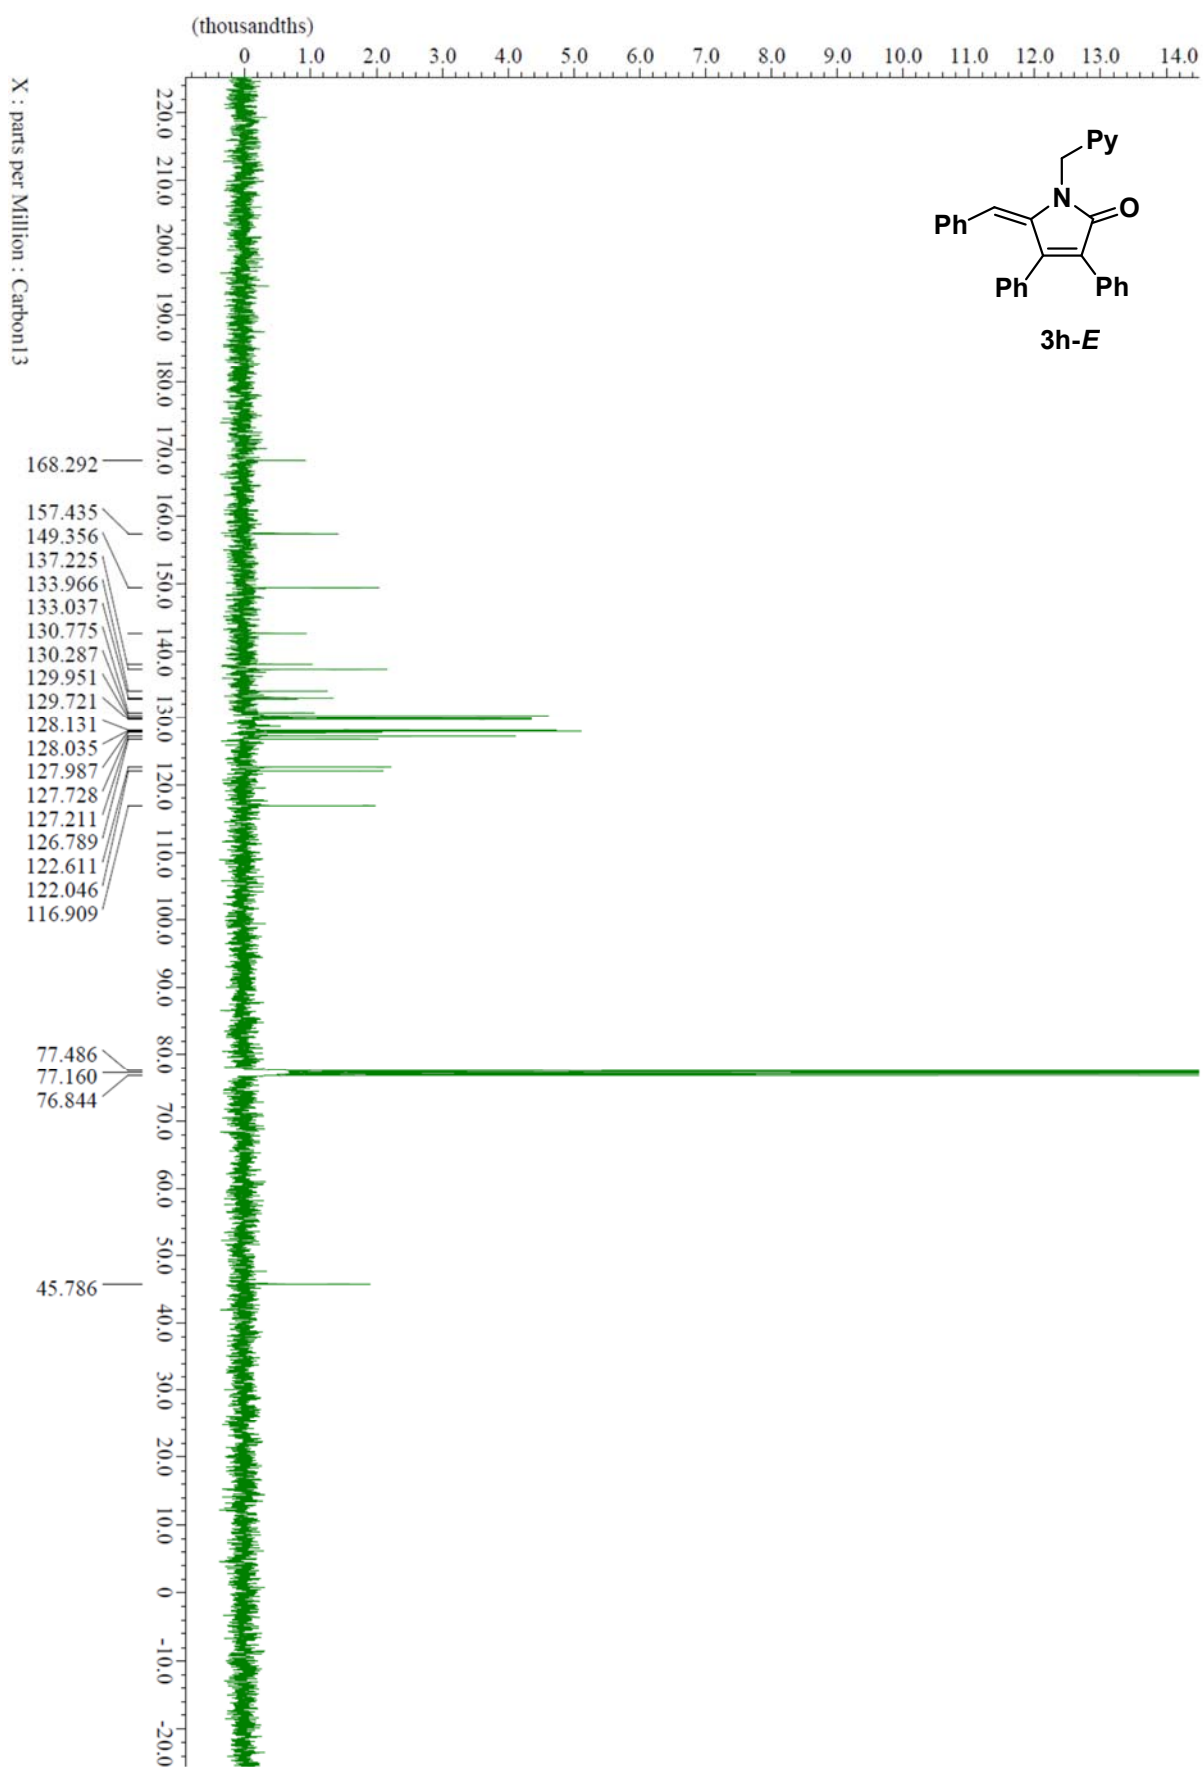

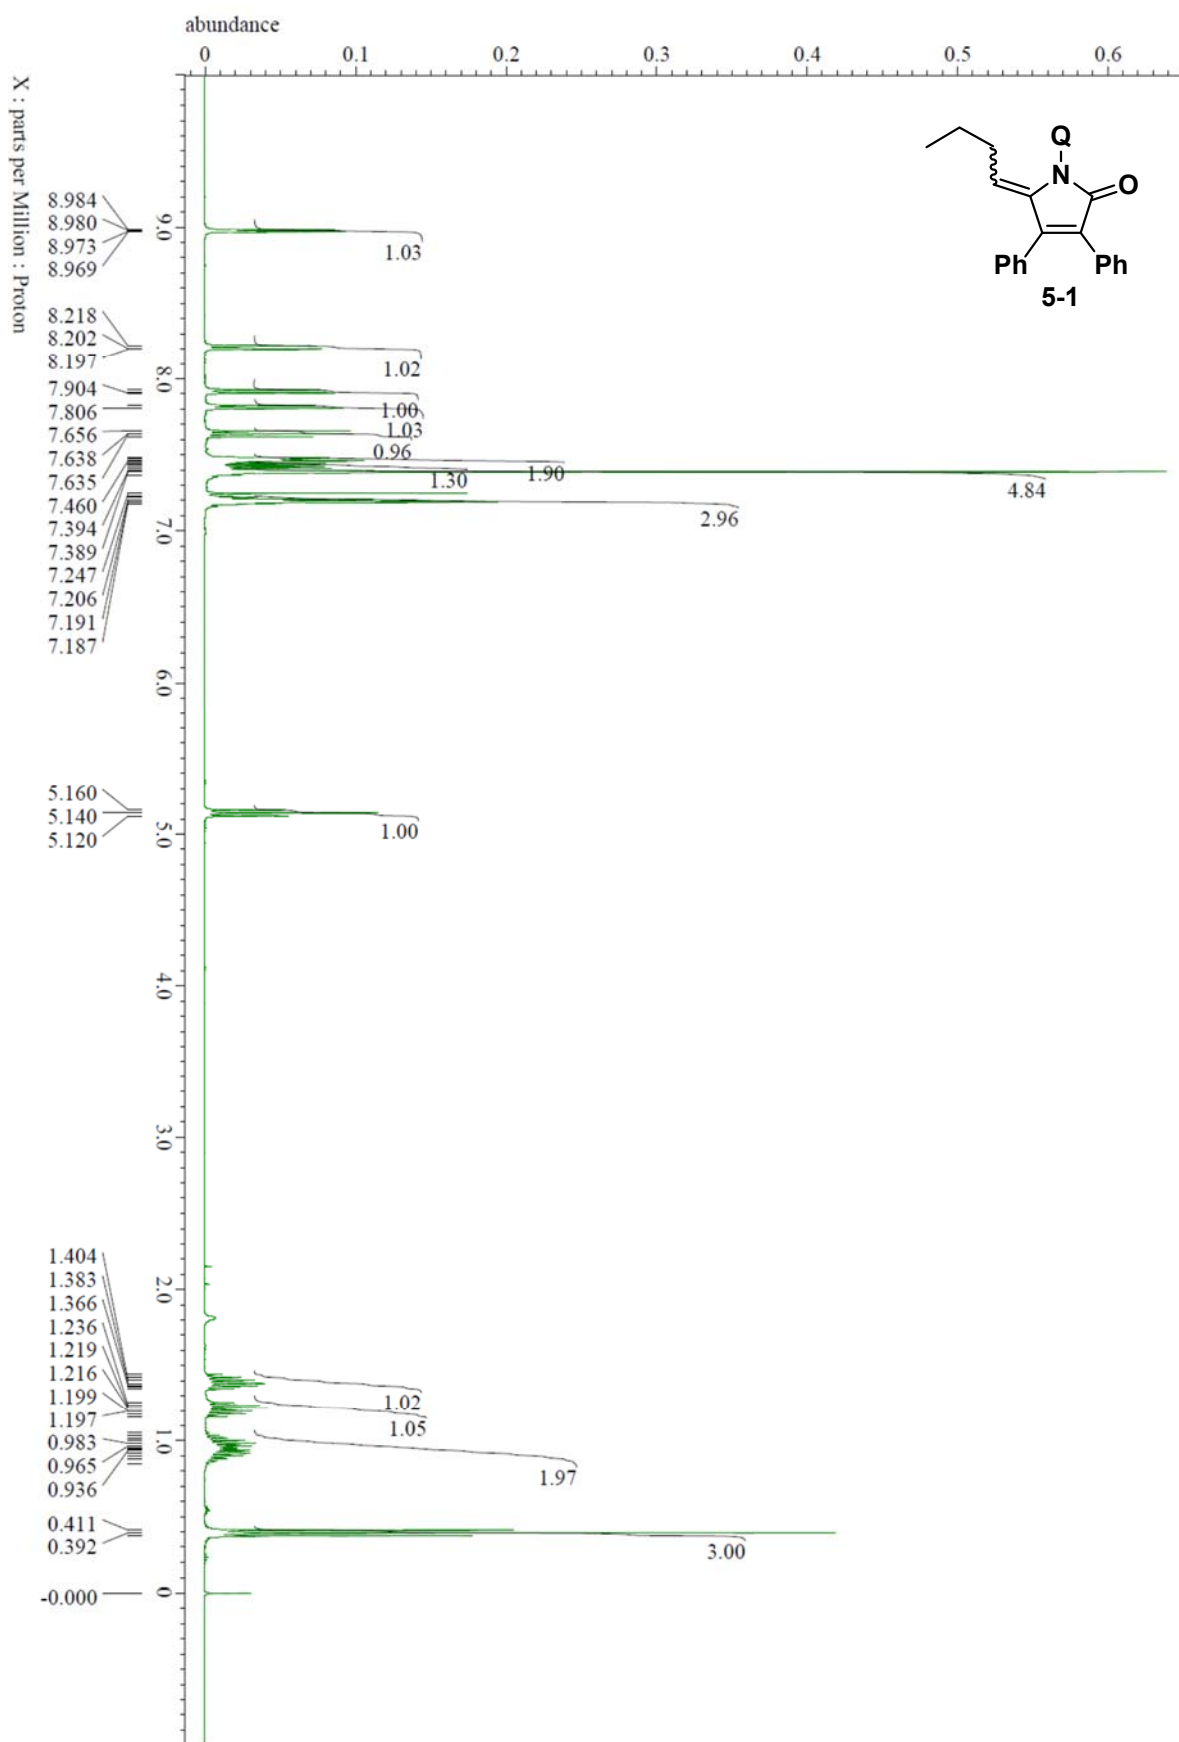

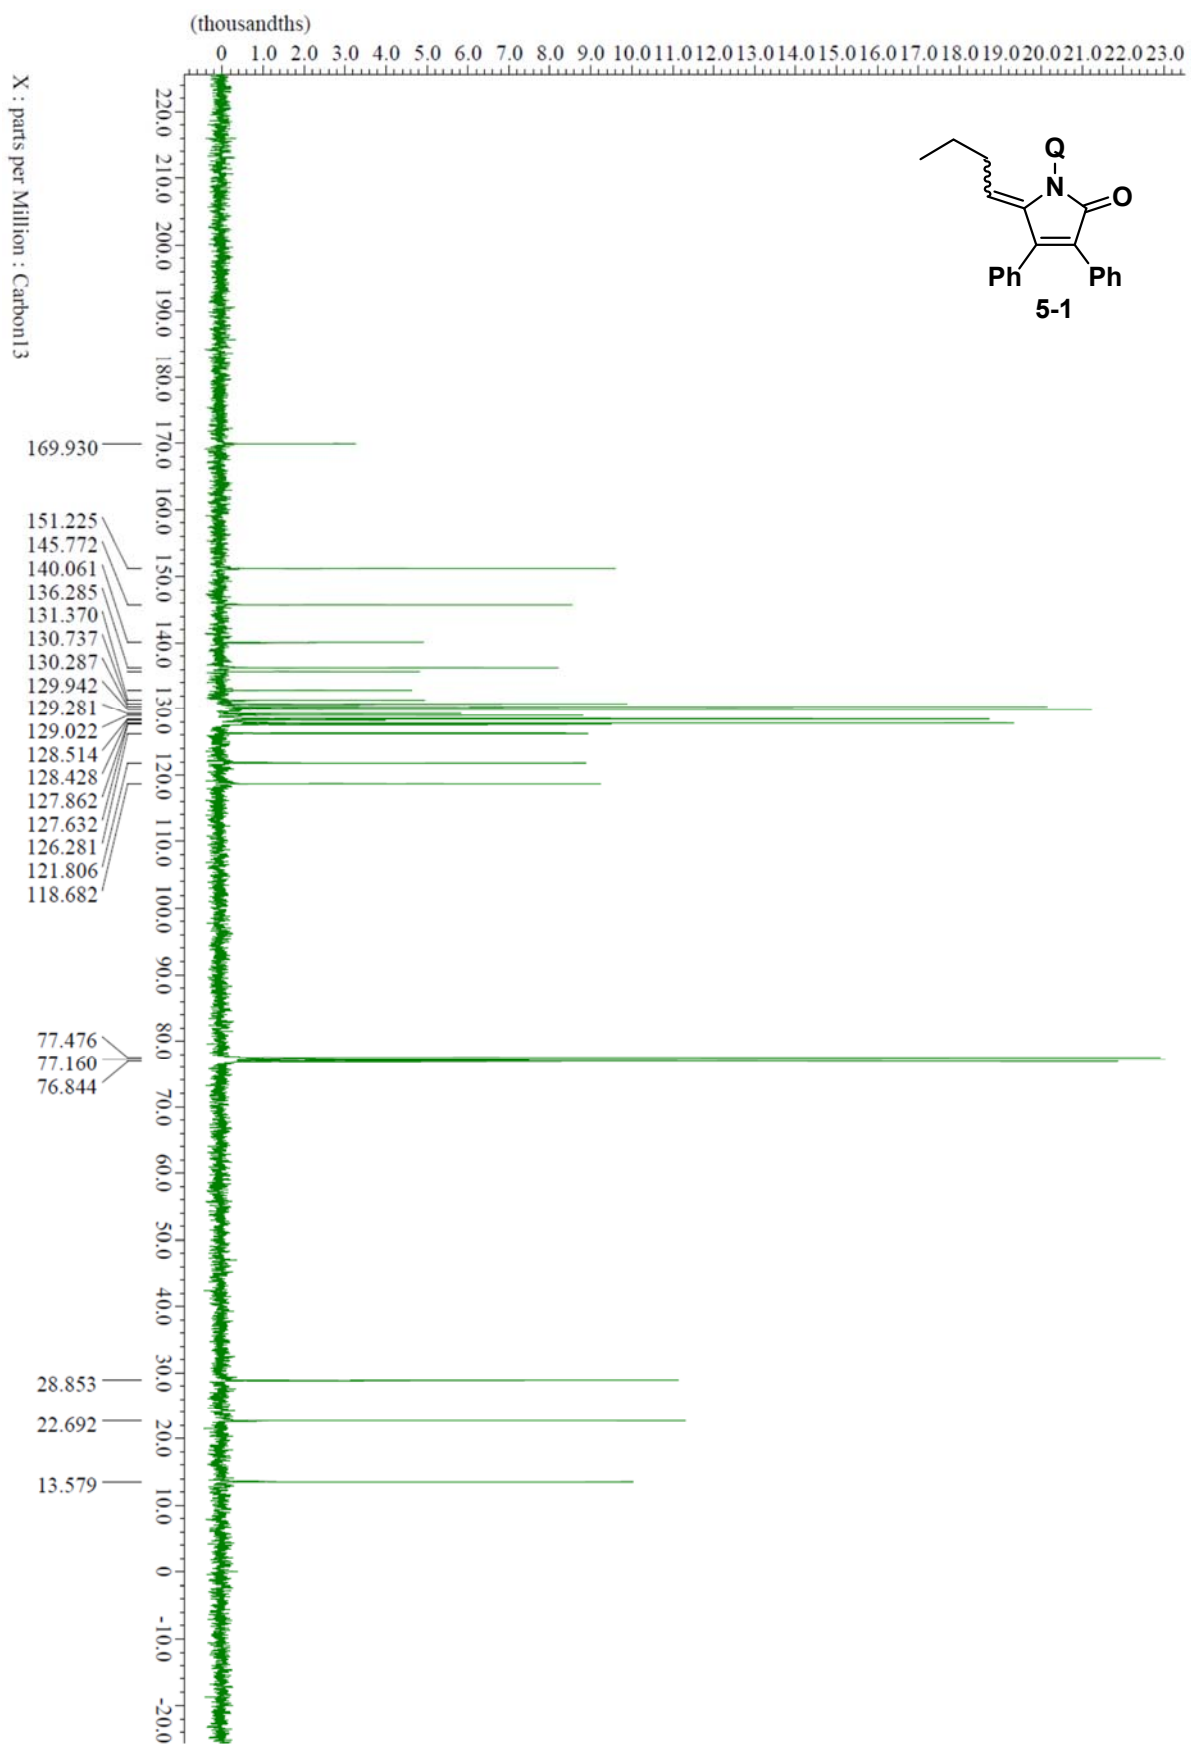

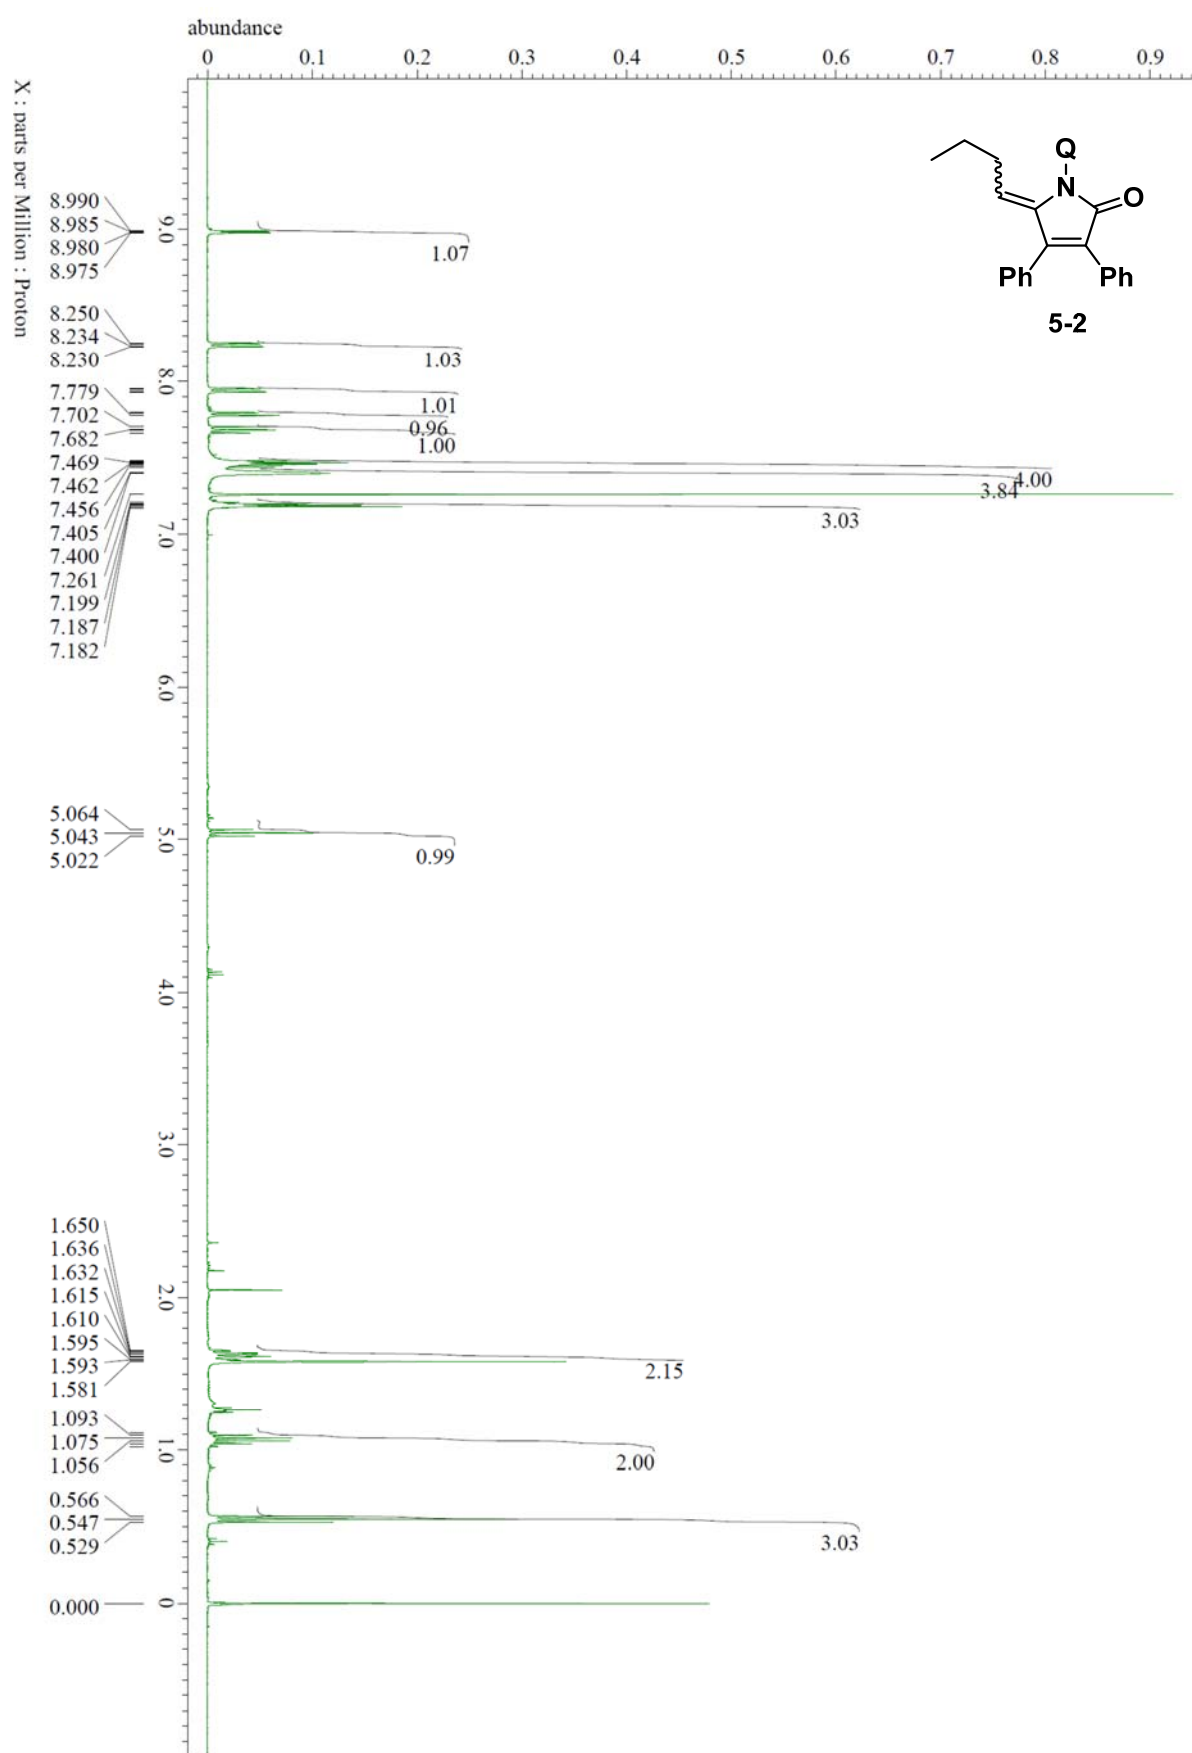

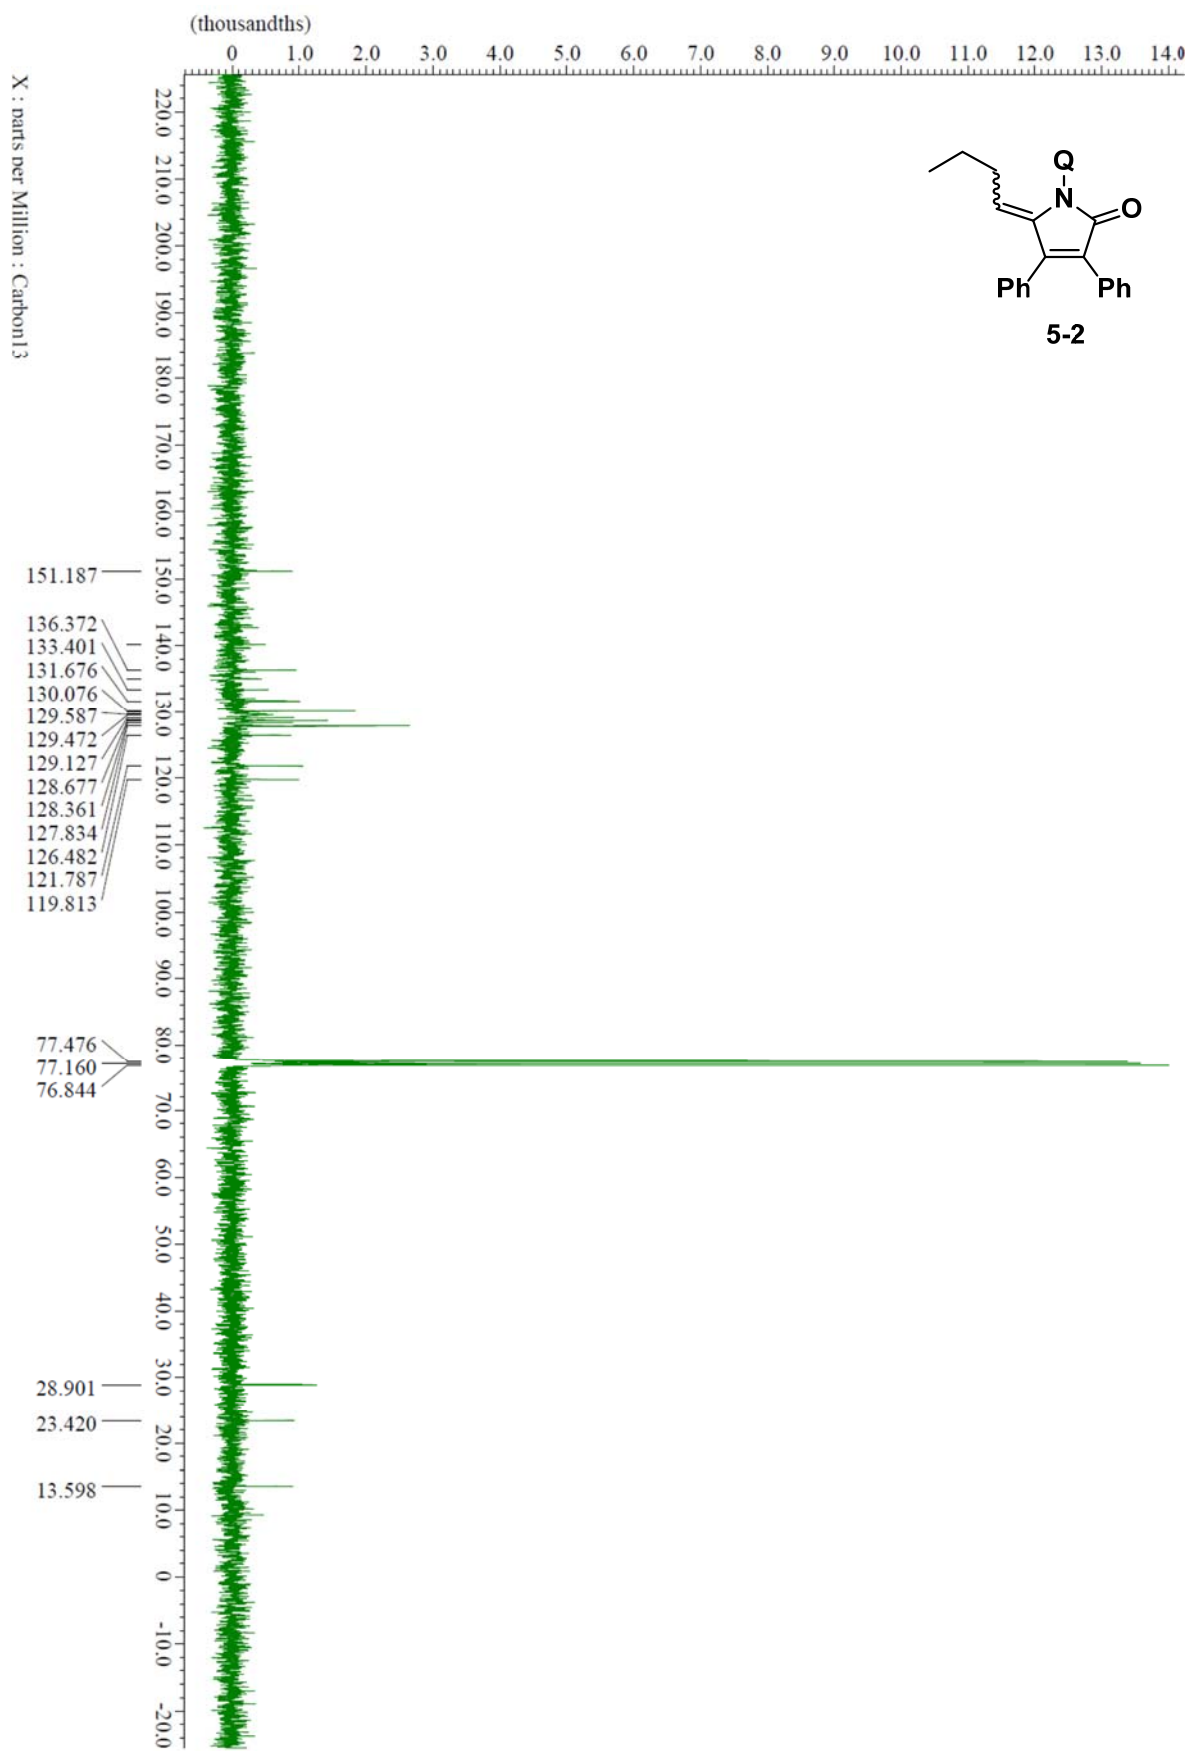

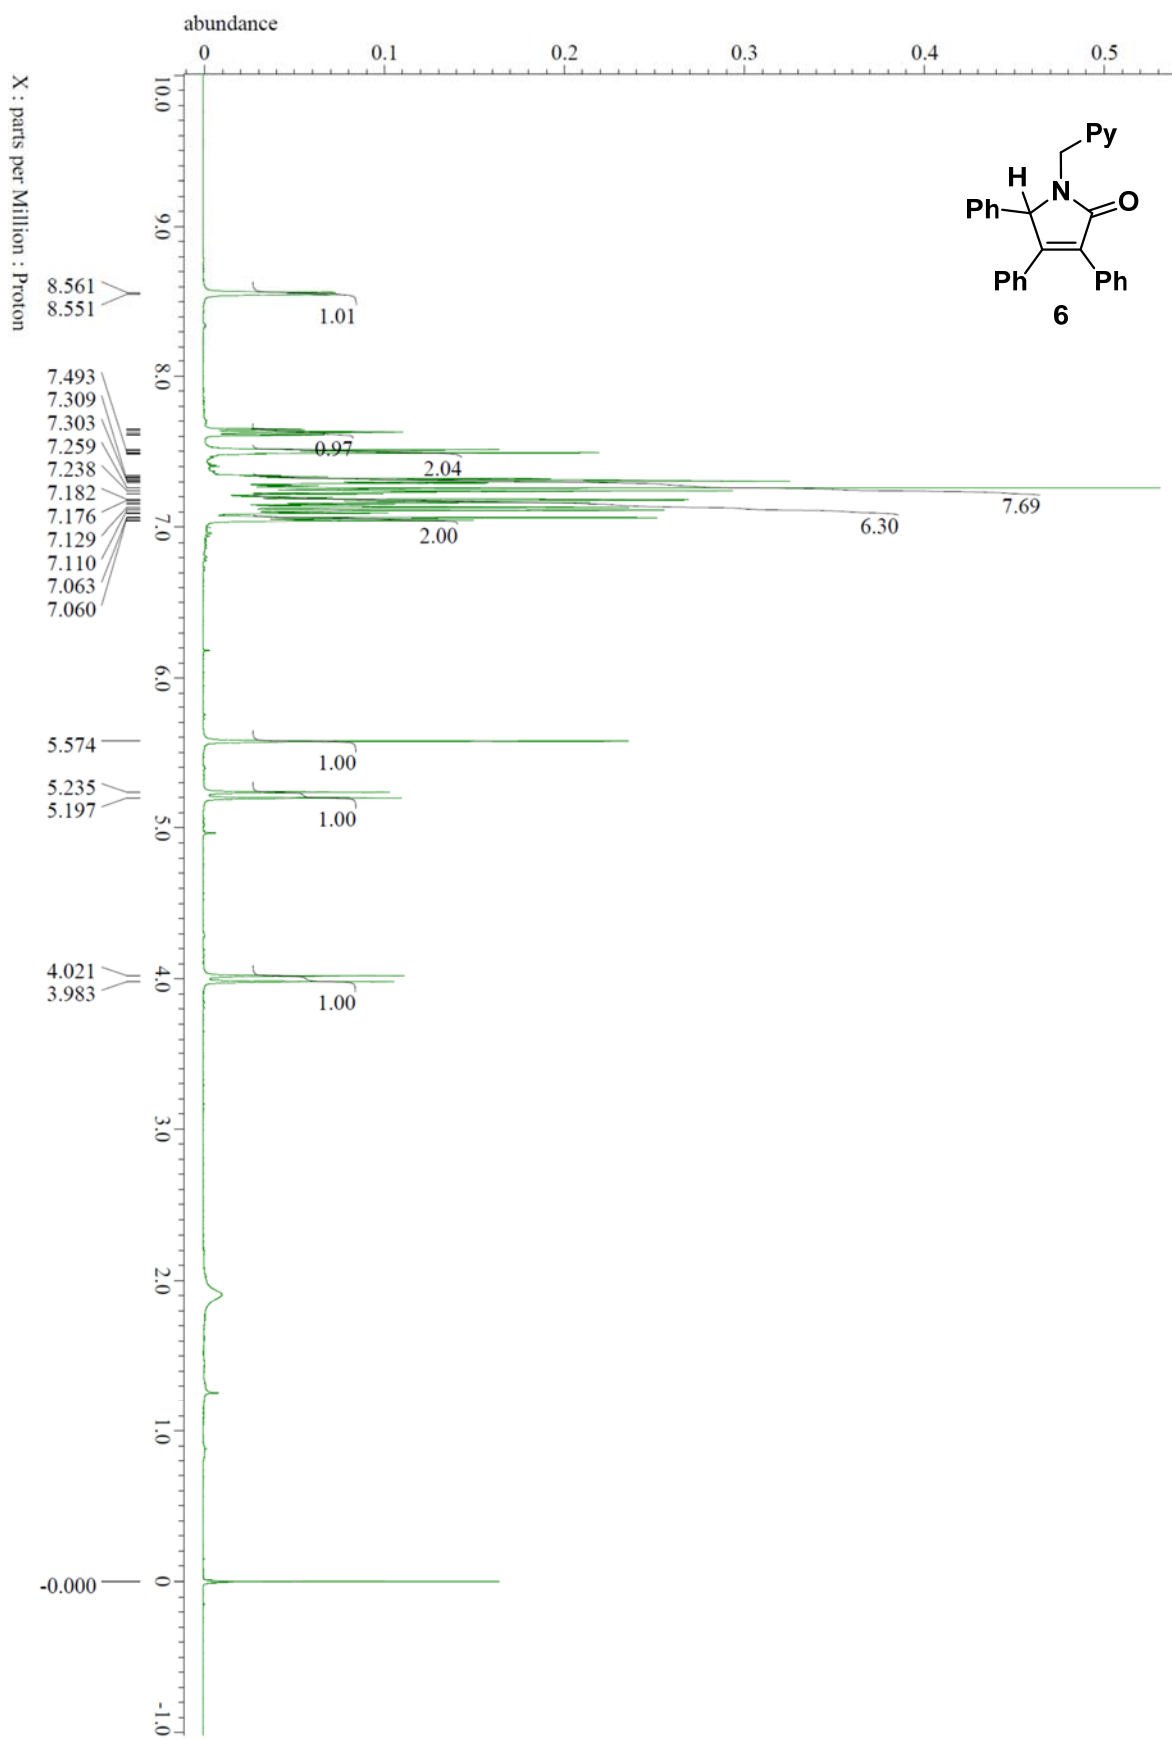



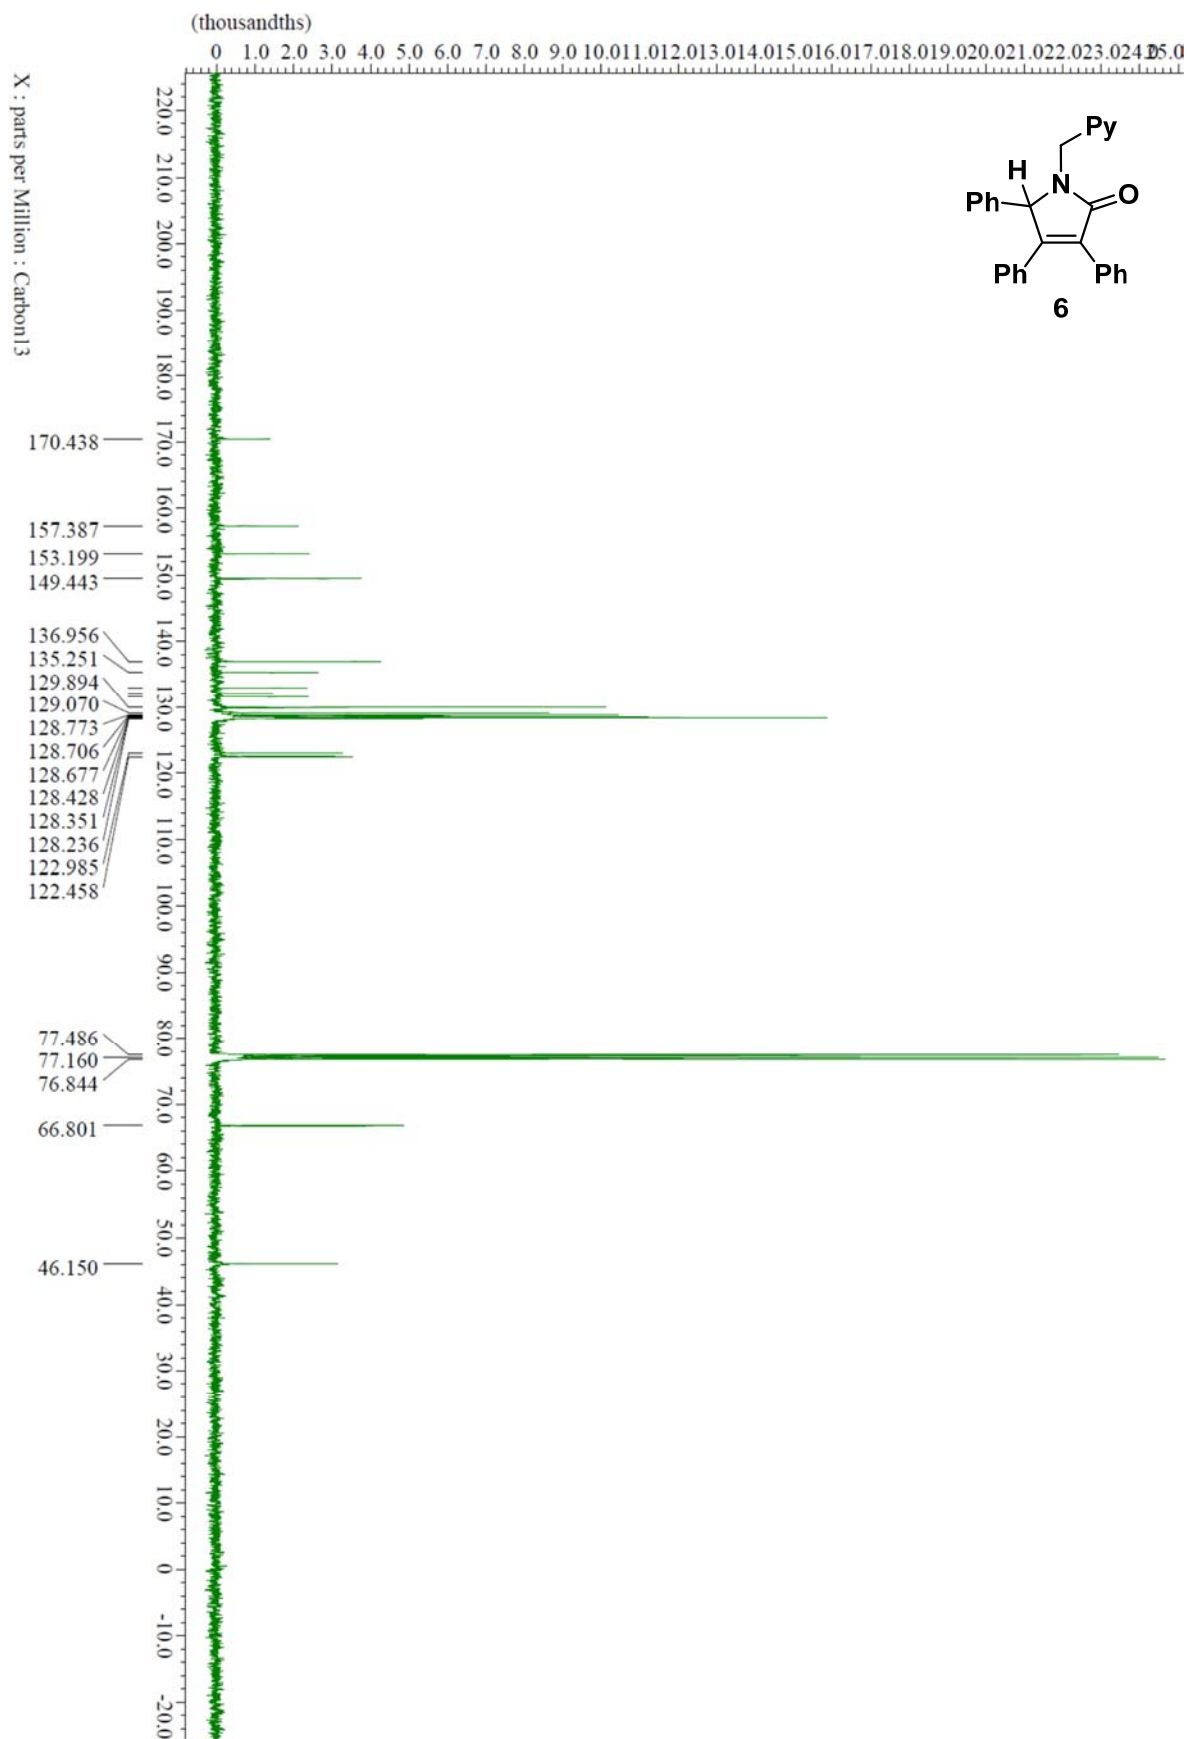

## IX. References

- <sup>1</sup> J. Chatt, L. M. Venanzi, *J. Chem. Soc.*, 1957, 4735.
- <sup>2</sup> Y.-T. Chang, J. Choi, S. Ding, E. E. Prieschl, T. Baumruker, J.-M. Lee, S.-K. Chung, P. G. Schultz, *J. Am. Chem. Soc.*, 2002, **124**, 1856.
- <sup>3</sup> Y. Wang, Y. Zhang, B. Yang, A. Zhang, Q. Yao, *Org. Biomol. Chem.*, 2015, **13**, 4101.
- <sup>4</sup> A. M. Signori, E. Latocheski, B. L. Albuquerque, D. Faggion, T. B. Bisol, L. Meier, J. B. Domingos, *New J. Chem.*, 2015, **39**, 1574.
- <sup>5</sup> N. Hasegawa, V. Charra, S. Inoue, Y. Fukumoto, N. Chatani, *J. Am. Chem. Soc.*, 2010, **133**, 8070.
- <sup>6</sup> K. Shibata, N. Hasegawa, Y. Fukumoto, N. Chatani, *ChemCatChem*, 2012, **4**, 1733.
- <sup>7</sup> S. Inoue, H. Shiota, Y. Fukumoto, N. Chatani, *J. Am. Chem. Soc.*, 2009, **131**, 6898.
- <sup>8</sup> D. S. Roman, V. Poiret, G. Pelletier, A. B. Charette, *Eur. J. Org. Chem.*, 2015, 67.
- <sup>9</sup> Y. Ano, M. Tobisu, N. Chatani, *Org. Lett.*, 2012, **14**, 354.
- <sup>10</sup> C. M. Vanos, T. H. Lambert, *Angew. Chem. Int. Ed.*, 2011, **50**, 12222.
- <sup>11</sup> T. Stach, J. Dräger, P. H. Huy, *Org. Lett.*, 2018, **20**, 2980.
- <sup>12</sup> R. Breslow, L. J. Altman, A. Krebs, E. Mohacsi, I. Murata, R. A. Peterson, J. Posner, *J. Am. Chem. Soc.*, 1965, **87**, 1326.
- <sup>13</sup> S. Kathiravan, S. Ghosh, G. Hogarth, I. A. Nicholls, *Chem. Commun.*, 2015, **51**, 4834.
- <sup>14</sup> F.-R. Gou, X.-C. Wang, P.-F. Huo, H.-P. Bi, Z.-H. Guan, Y.-M. Liang, *Org. Lett.*, 2009, **11**, 5726.
- <sup>15</sup> A. Altomare, G. Casciarano, C. Giacovazzo, A. Guagliardi, Completion and Refinement of Crystal Structures with SIR92. *J. Appl. Cryst.* 1993, **26**, 343.
